# Supplementary material
Source: Elsevier journal article supplement (https://www.sciencedirect.com/science/article/pii/S0213005X1830168X)
Supplement: mmc1 [file S0213005X1830168X:mmc1.pdf]

## CONSENSUS STATEMENT

### **Resumen ejecutivo del tratamiento antimicrobiano domiciliario endovenoso (TADE): Guía de la Sociedad Española de Enfermedades Infecciosas y Microbiología Clínica (SEIMC) y la Sociedad Española de hospitalización a domicilio (SEHAD)**

*Luis Eduardo López Cortés (Coordinator)<sup>\*,a</sup>, Abel Mujal Martínez (Coordinator)<sup>b</sup>, Magdalena Fernández Martínez de Mandojana<sup>c</sup>, Natalia Martín<sup>d</sup>, Mercè Gil Bermejo<sup>e</sup>, Joan Solà Aznar<sup>f</sup>, Eulalia Villegas Bruguera<sup>g</sup>, Maria José Peláez Cantero<sup>h</sup>, Pilar Retamar Gentil<sup>a</sup>, Miriam Delgado Vicente<sup>i</sup>, Víctor José González-Ramallo<sup>j</sup>, Miguel Ángel Ponce González<sup>k</sup>, Manuel Mirón Rubio<sup>l</sup>, M<sup>a</sup> Montserrat Gómez Rodríguez de Mendarozqueta<sup>m</sup>, Miguel Ángel Goenaga Sánchez<sup>n</sup>, Pedro Sanroma Mendizábal<sup>ñ</sup>, Elena Delgado Mejía<sup>o</sup>, Marcos Pajarón Guerrero<sup>p</sup>, on behalf of the Sociedad Española de Enfermedades Infecciosas y Microbiología Clínica (SEIMC) and the Sociedad Española de Hospitalización a Domicilio (SEHAD) Group.*

<sup>a</sup> Unidad Clínica de Enfermedades Infecciosas y Microbiología, Hospital Universitario Virgen Macarena/Instituto de Biomedicina de Sevilla (IBiS)/Universidad de Sevilla/Centro Superior de Investigaciones Científicas, Seville, Spain.

<sup>b</sup> Home Hospital Unit, Department of Internal Medicine, Sabadell Hospital, Corporació Sanitària Parc Taulí, Universitat Autònoma de Barcelona.

<sup>c</sup> OSI Debarrena

<sup>d</sup> Hospital San Pedro, Logroño.

<sup>e</sup> Hospital Universitario de Bellvitge, Barcelona

<sup>f</sup> Parc Taulí Hospital Universitari, Barcelona

<sup>g</sup> Hospital Dos de Maig, Barcelona.

<sup>h</sup> Hospital Materno-Infantil Carlos Haya, Málaga

<sup>i</sup> Hospital Universitario de Álava

<sup>j</sup> Hospital General Universitario Gregorio Marañón, Madrid

<sup>k</sup> Hospital Universitario de Gran Canaria Dr. Negrín

<sup>l</sup> Hospital de Torrejón, Madrid

<sup>m</sup> Hospital Universitário de Alava.

<sup>n</sup> OSI Donostialdea

<sup>ñ</sup> Hospital Marqués de Valdecilla, Santander

<sup>o</sup> Hospital Son Espases, Palma de Mallorca

<sup>p</sup> Hospital Marqués de Valdecilla, Santander

## **CAPITULO 1. Definición de TADE. Composición de un equipo TADE. Circuito asistencial del programa TADE.**

**Autores:** Carmen Garde Orbaiz. Hospital Universitario Donostia.  
Magdalena Fernández Martínez de Mandojana. OSI Debarrena.

### **INTRODUCCIÓN**

El TADE (Tratamiento Antibiótico Domiciliario Endovenoso) o su acrónimo más utilizado en inglés, OPAT (*Outpatient Parenteral Antimicrobial Therapy*), se definen como la administración de un antibiótico por vía parenteral en un paciente ambulatorio<sup>1</sup>.

El término fue descrito por primera vez en 1974 por Rucker *et al.* en una publicación sobre antibioterapia administrada de forma parenteral en niños con fibrosis quística pero que pernoctaban fuera del hospital<sup>2</sup>. La primera experiencia en pacientes adultos se describió en 1978 por Antoniskis *et al.* en trece pacientes principalmente con osteomielitis y que se autoadministraron el antibiótico por vía parenteral<sup>3</sup>. Este estudio, demostró tanto la efectividad como la seguridad de esta modalidad asistencial, así como un ahorro significativo sobre el grupo control que fue tratado en el hospital.

Progresivamente los programas TADE se han ido estableciendo y desarrollando en diferentes países: Canadá, Australia, Nueva Zelanda, Singapur, Italia, Irlanda, Reino Unido, Bélgica, España<sup>4-7</sup>, mostrando ventajas tanto para los pacientes como para el sistema sanitario. Durante estos años se han ido publicando revisiones sistemáticas sobre más de 60.000 episodios TADE no hallando diferencias en cuanto a la duración de los tratamientos o sus efectos adversos en comparación con los pacientes tratados en hospitalización convencional (HC), mostrando además una alta satisfacción de los pacientes a los que se les aplicó esta modalidad asistencial<sup>8</sup>.

El TADE por tanto es una modalidad asistencial segura, efectiva y más eficiente que la HC en el tratamiento de los procesos infecciosos<sup>9</sup>. Cuando el paciente recibe el alta precoz de HC o se realiza el tratamiento de la infección sin ingreso hospitalario, las complicaciones asociadas al medio hospitalario se reducen consiguiendo una recuperación más rápida favoreciendo además el retorno precoz del paciente al medio familiar, social y laboral<sup>7,10</sup>.

Una gran variedad de infecciones son candidatas a TADE: infecciones de piel y partes blandas (IPPB), infecciones respiratorias, del tracto urinario (ITU), infecciones osteoarticulares, endocarditis, bacteriemias por grampositivos y gramnegativos resistentes a terapias orales, entre otras<sup>4,11</sup>.

La experiencia en los programas TADE ha ido creciendo y evolucionando como se constata al revisar la literatura: el alta hospitalaria cada vez más precoz siendo mayor el porcentaje de tiempo del tratamiento en el domicilio, el inicio del tratamiento antibiótico sin hospitalización previa, el incremento del uso de catéteres centrales de inserción periférica (CCIP) para tratamientos prolongados así como la atención a pacientes pediátricos o de edad avanzada<sup>12,13</sup>.

El TADE se ha ido desarrollando de forma heterogénea tanto en nuestro país como en el resto de países que practican esta modalidad asistencial. Este hecho obedece en España a múltiples factores entre los que se encuentran: las necesidades de los propios servicios hospitalarios, los recursos de cada centro y sobre todo el conocimiento y la decisión de las propias consejerías de Sanidad de incluir esta modalidad asistencial en los hospitales de cada comunidad autónoma. En otros países, los diferentes sistemas sanitarios y la geografía de los mismos, pueden también marcar diferencias.

Durante estos últimos años y en un intento de homogeneizar su práctica han ido surgiendo diversas guías de TADE desarrolladas por expertos de diferentes especialidades<sup>4,12,14,15</sup>. El TADE, sin guías de recomendación ni supervisión adecuada, podría asociarse a un mayor riesgo clínico con respecto a pacientes en régimen hospitalario<sup>16,17</sup>, o bien a realizar una prescripción antibiótica inadecuada, prolongando así la terapia parenteral y retrasando la terapia secuencial oral<sup>18</sup>.

En un programa TADE se deben definir cinco áreas clave<sup>15</sup>:

- Estructura del servicio y componentes del equipo.
- Selección adecuada de los pacientes.
- Manejo y administración de cada antibiótico.
- Monitorización de los pacientes durante el proceso.
- Resultados y gestión clínica.

Todas ellas se desarrollarán a lo largo de este documento de consenso.

## **COMPOSICIÓN DE UN EQUIPO TADE**

Hay un acuerdo general en que los TADE deben llevarse a cabo mediante un enfoque de equipo, dirigido por un médico especialista y con experiencia en TADE<sup>1,7,18,19</sup>.

En España, el TADE se puede realizar en unidades específicas de Hospitalización a Domicilio (HAD), con personal médico y de enfermería propios y que integran esta modalidad asistencial en su cartera de servicios<sup>11,20</sup>, aunque también existen unidades de HAD integradas en servicios hospitalarios como Medicina Interna, Hematología, Pediatría, entre otros<sup>21</sup> y dedicados a la realización del TADE de sus propios pacientes con sus propios especialistas o teniendo a infectólogos y microbiólogos como referentes.

En esta modalidad asistencial es clave el papel del personal de enfermería. Su actividad, además de la administración del tratamiento parenteral, incluye: la selección del acceso venoso más idóneo según el antibiótico y la duración del tratamiento, la educación y el entrenamiento del paciente en las diferentes modalidades de administración, corresponsabilizándose con el médico del equipo del control clínico y evolutivo del paciente<sup>4</sup>.

La implicación del servicio de Farmacia con el equipo TADE es esencial, conociendo los tiempos de estabilidad de los antibióticos, los efectos adversos, las interacciones o la necesidad de monitorización de algunos de ellos, los volúmenes en los que diluir el antibiótico dependiendo de su concentración máxima posible, de la estabilidad a temperatura ambiente del mismo y de la modalidad de administración, todo ello con el objetivo de facilitar el trabajo del equipo asistencial y un mejor manejo de los propios pacientes<sup>18,22</sup>.

Asimismo, debe existir una estrecha relación con los servicios de Enfermedades Infecciosas y de Microbiología, realizando en colaboración con el resto de servicios hospitalarios protocolos de tratamiento para las patologías más frecuentes, colaborando en las indicaciones y tratamientos iniciados por ellos y posibilitando su actuación como consultores cuando se solicite.

Es fundamental el soporte administrativo, tanto para la propia actividad del equipo TADE, ya de por sí compleja, como para la coordinación con otros profesionales intra y extrahospitalarios, así como con el resto de estructuras presentes en la organización en la que se integra.

## **CIRCUITO ASISTENCIAL DEL PROGRAMA TADE**

Los pacientes susceptibles de ser atendidos en un programa TADE, pueden proceder de cualquier enclave hospitalario ya sean plantas de HC, consultas externas, servicio de Urgencias, áreas de corta estancia, etc., así como de centros socio-sanitarios e incluso de Atención Primaria.

El médico responsable del paciente, debe contactar con el equipo TADE que, previo a la inclusión del paciente en el mismo, deberá valorar<sup>4</sup>:

- La estabilidad del paciente
- La idoneidad del tratamiento a realizar,
- La posibilidad de que ese tratamiento pueda ser llevado a cabo por parte del equipo TADE, bien por la propia medicación a administrar, bien por cobertura horaria o geográfica.
- La situación social del paciente para poder llevar a cabo el programa TADE en su domicilio
- La aceptación por parte del paciente y/o su familia del ingreso en esta modalidad asistencial.

Una vez aceptado, el control clínico del paciente y el tratamiento se realizará fuera de una cama de hospitalización, habitualmente en su domicilio.

## RECOMENDACIONES FINALES

- La administración de un antibiótico parenteral en un paciente ambulatorio (TADE) es una práctica cada vez más frecuente, segura, efectiva y con menor coste (A-II).
- Gran variedad de infecciones son candidatas a TADE (A-III).
- El paciente susceptible de esta terapia puede ser derivado desde cualquier nivel asistencial (B-II).
- Debe ser un programa multidisciplinar: personal médico, de enfermería y administrativo adscrito al programa, en estrecha colaboración con farmacéuticos y microbiólogos (A-II).
- Se necesitan guías de recomendación y supervisión adecuada para garantizar la idoneidad y seguridad del tratamiento (A-II).

## BIBLIOGRAFÍA

1. Tice AD, Rehm SJ, Dalovisio JR, Bradley JS, Martinelli LP, Graham DR, Gainer RB, Kunkel MJ, Yancey RW, Williams DN; IDSA. Practice guidelines for outpatient parenteral antimicrobial therapy. IDSA guidelines. *Clin Infect Dis* 2004; 38(12):1651-72.
2. Rucker RW, Harrison GM. Outpatient intravenous medications in the management of cystic fibrosis. *Pediatrics* 1974; 54(3):358-60.

3. Antoniskis A, Anderson BC, Van Volkinburg EJ, Jackson JM, Gilbert DN. Feasibility of outpatient self-administration of parenteral antibiotics. *West J Med* 1978; 128(3):203-6.
4. Seaton RA, Barr DA. Outpatient parenteral antibiotic therapy: Principles and practice.s.l. : *European Journal of Internal Medicine*, 2013, Vols. 24:617-623.
5. Silvano, Exposito. La terapia antibiótica iniettiva domiciliare: il modello italiano. *La Infezioni in Medicina*. 2001, Vols. 1:7-12.
6. Muldoon EG, Snyderman DR, Penland EC, Allison GM. Are we ready for an outpatient parenteral antimicrobial therapy bundle? A critical appraisal of the evidence. *Clin Infect Dis* 2013; 57(3):419-24.
7. Ravelingien T, Buyle F, Deryckere S, Sermijn E, Debrauwere M, Verplancke K, Callens S, Commeyne S, Pattyn C, Vogelaers D. Optimization of a model of out-of-hospital antibiotic therapy (OPAT) in a Belgian university hospital resulting in a proposal for national implementation. *Acta Clin Belg* 2016; 19:1-6.
8. Mitchell ED, Czoski Murray C, Meads D, Minton J, Wright J, Twiddy M. Clinical and cost-effectiveness, safety and acceptability of community intravenous antibiotic service models: CIVAS systematic review. *BMJ Open* 2017; 7(4):e013560.
9. González-Ramallo VJ, Mirón-Rubio M, Mujal A, Estrada O, Forné C, Aragón B, Rivera AJ. Costs of outpatient parenteral antimicrobial therapy (OPAT) administered by Hospital at Home units in Spain. *Int J Antimicrob Agents* 2017; 50(1):114-118.
10. Chapman A, Dixon S, Andrews D, Lillie J, Bazaz R, Patcher J. Clinical efficacy and cost-effectiveness of outpatient parenteral antibiotic therapy (OPAT): a UK perspective. *Journal of Antimicrobial Chemotherapy* 2009; 64:1316-1324.
11. Garde C, Millet M, Goenaga MA, Arzelus E, Cuende A, Sarasqueta C, Carrea JA. Treatment of respiratory infections by *Pseudomonas aeruginosa* in adult patients within a hospital at home service: clinical characteristics and analysis of prognostic factors for relapse. *Enferm Infecc Microbiol Clin* 2009; 27:257-62.
12. Williams DN, Baker CA, Kind AC, Sannes MR. The history and evolution of outpatient parenteral antibiotic therapy (OPAT). *Int J Antimicrob Agents* 2015; 46(3):307-12.

13. Mujal A, Sola J, Hernandez M, Villarino Ma, Baylina M, Tajan J, Oristrell J. Safety and effectiveness of outpatient parenteral antimicrobial therapy in older people. *J Antimicrob Chemother* 2016; 71(5):1402-7.
14. Muldoon E, Allisson G, Gallagher D, Snyderman D, Bergin C. Outpatient parenteral antibiotic (OPAT) in the Republic of Ireland: results of a national survey. *Eur J Clin Microbiol Infect Dis* 2013; 32(11):1465-70.
15. Chapman A, Seaton R, Cooper M, Hedderwick S, Godall V, Reed C, *et al.* Good practice recommendations for outpatient parenteral antimicrobial therapy (OPAT) in adults in the UK: a consensus statement. *J Antimicrob Chemother*, 2012; 66:1053-1062.
16. Chapman AL. Outpatient parenteral antimicrobial therapy in a changing NHS: challenges and opportunities. *Clin Med (Lond)* 2013; 13(1):35-6.
17. Hale CM, Steele JM, Seabury RW, Miller CD. Characterization of Drug-Related Problems Occurring in Patients Receiving Outpatient Antimicrobial Therapy. *J Pharm Pract* 2017; 30(6):600-605.
18. Ruiz-Campuzano M, Garcia-Vazquez E, Hernandez-Roca JJ, Gomez-Gomez J, Canteras-Jordana M, Mené-Fenor E, Hernandez-Torres A, Pelaez-Ballesta A. Design and implementation of an outpatient parenteral antimicrobial therapy program in primary care: the experience at a second level hospital. *Rev Esp Quimioter* 2017; 30(1): 19-27.
19. Nathwani D, Moitra S, Dunbar J, Crosby G, Peterkin G, Davey P. Skin and soft tissue infections: development of a collaborative management plan between community and hospital care. *Int J Clin Pract* 1998; 52(7):456-60.
20. Fernandez-Miera MF, Sanroma P, Sampedro I, Abad A. Methicillin-resistant *Staphylococcus aureus* and hospital at home. *Med Clin (Barc)* 2002; 119:639.
21. Cervera C, Mestres A. Daptomycin in outpatient antimicrobial parenteral therapy. *Enferm Infect Microbiol Clin* 2012; 30(Supl 1):59-63.
22. Lamont E, Seaton RA, Macpherson M, Semple L, Bell E, Thomson AH. Development of teicoplanin dosage guidelines for patients treated in an outpatient parenteral antibiotic therapy (OPAT) programme. *Antimicrob Chemother* 2009; 64: 181-7.
23. Seetoh T, Lye DC, Cook AR, Archuleta S, Chan M, Sulaiman Z, Zhong L, Llorin RM, Balm M, Fisher D. An outcomes analysis of outpatient parenteral antibiotic therapy (OPAT) in a large Asian cohort. *Int J Antimicrob Agents* 2013; 41(6):569-73.



24. Jenkins A, Hills T, Santillo M, Gilchrist M; Drug Stability Working Group of the BSAC UK OPAT Initiative. Extended stability of antimicrobial agents in administration devices. *J Antimicrob Chemother* 2017; 72(4):1217-1220.
25. Durojaiye OC, Bell H, Andrews D, Ntziora F, Cartwright K. Clinical efficacy, cost analysis and patient acceptability of outpatient parenteral antibiotic therapy (OPAT): a decade of Sheffield (UK) OPAT service. *Int J Antimicrob Agents* 2018; 51(1):26-32.

## **CAPITULO 2. Rol de cada miembro del equipo TADE. Criterios de inclusión de un paciente en un programa TADE.**

**Autores:** Dra. Natalia Martín. Hospital San Pedro (Logroño)  
Dr. Mario García Lezcano. Hospital de Can Misses (Ibiza)

### **INTRODUCCION**

El equipo asistencial para un programa TADE en HAD está compuesto por personal médico y de enfermería y por sus características especiales, también por el paciente, su cuidador y en algunos hospitales, por farmacéuticos y auxiliares de enfermería<sup>1</sup>.

El facultativo de HAD coordinará el dispositivo asistencial<sup>2,3</sup>. Será el encargado, junto con enfermería de realizar la valoración inicial del paciente en la que se decidirá si cumple los criterios de ingreso en HAD para realizar un programa TADE<sup>1</sup>. Será el responsable de la atención médica a los enfermos y del tratamiento prescrito. Se encargará además de coordinar las intervenciones con otros médicos y con el resto de los miembros del equipo asistencial<sup>2</sup>, así como de decidir cuáles serán los controles y exámenes complementarios precisos<sup>3,4</sup>. Será también el responsable del alta del paciente y de organizar su seguimiento ambulatorio posterior<sup>1</sup>.

El personal de enfermería de HAD será el encargado de llevar a cabo los cuidados generales de enfermería del paciente ingresado, del control de los accesos venosos, de llevar a término el plan terapéutico establecido y de instruir a los pacientes, tanto en los posibles efectos adversos derivados de la medicación prescrita, como en la autoadministración del TADE en el caso que de fuese necesario, y en el manejo de los dispositivos de administración que se vayan a utilizar<sup>5,6</sup>. También será el encargado de la preparación y transporte al domicilio en condiciones óptimas del antibiótico prescrito y del material

necesario para su administración<sup>6</sup>. Los auxiliares de enfermería serán los encargados de la preparación y mantenimiento de todo el material.

El paciente y/o sus cuidadores deben cumplir los criterios de ingreso en un programa TADE en HAD, estar correctamente informados y entender los beneficios, los riesgos y las posibles complicaciones del TADE<sup>6</sup>. También deben estar instruidos en el reconocimiento de complicaciones, en cómo actuar en el caso de producirse, y en el manejo de la técnica de infusión en el caso de que sea preciso (autoadministración, dispositivos electrónicos)<sup>1</sup>.

El personal de farmacia será el responsable de preparar las diluciones, de proporcionar la medicación y de asesorar en cuestiones del tratamiento<sup>2</sup>.

### **CRITERIOS DE INCLUSIÓN DE PACIENTES EN UN PROGRAMA TADE**

El factor fundamental para garantizar el éxito de un programa TADE es la adecuada selección de los pacientes<sup>6,7</sup>.

En nuestro entorno, el TADE se presenta generalmente en el marco de la HAD<sup>1</sup>, por lo que el paciente candidato a TADE debe cumplir los siguientes criterios<sup>1,6,7</sup>:

- Criterios de ingreso en un programa de HAD:
  - a. Voluntariedad del paciente y familiar/cuidador
  - b. Disponibilidad de comunicación telefónica
  - c. Residencia dentro del área de cobertura
  - d. Condiciones higiénicas del domicilio y socio familiares adecuadas
  - e. Ausencia de descompensación aguda de patología psiquiátrica y de abuso activo de alcohol o drogas
  - f. Estabilidad clínica y hemodinámica del paciente
  
- Criterios específicos para TADE:
  - a. Necesidad de administración de antimicrobiano endovenoso por no existir otras opciones o no ser recomendables
  - b. Disponibilidad de acceso venoso adecuado en calibre y localización al tipo de fármaco y la duración prevista del tratamiento
  - c. Administración de la primera dosis del antibiótico en el hospital salvo en casos seleccionados
  - d. Nivel de comprensión y colaboración adecuado del enfermo y el cuidador acerca del tratamiento propuesto

Dentro de los criterios generales de ingreso en HAD, todos los autores coinciden en que para que el TADE sea seguro y efectivo, el paciente tiene que estar en situación de estabilidad clínica y hemodinámica, entendiendo como tal que el paciente esté apirético, con constantes vitales normalizadas y que el curso de la infección esté estabilizado o razonablemente no en progresión<sup>2</sup>. Deberá realizarse además una valoración por personal médico experto en HAD y TADE en cada caso concreto.

Entre los criterios específicos de inclusión en un programa TADE cabe destacar como fundamental un nivel adecuado de comprensión y colaboración del enfermo y del cuidador. En los casos de autoadministración los factores dependientes del propio paciente, el cuidador y su entorno, son críticos para el éxito del tratamiento (agudeza visual, mental o auditiva, destreza manual, fuerza, entorno apropiado)<sup>2</sup>.

High *et al.*<sup>8</sup> resume en unas preguntas la adecuación o no de un programa TADE. Si la respuesta a todas estas preguntas es afirmativa, el TADE es una buena opción de tratamiento para ese proceso infeccioso<sup>8</sup>:

- ¿Es necesario el tratamiento endovenoso y no existen otras opciones vía oral con una eficacia equivalente?
- ¿El lugar de tratamiento (domicilio) es adecuado?
- ¿Existe estabilidad clínica?
- ¿El cuidador o el enfermo entienden y pueden realizar correctamente las indicaciones del tratamiento?
- ¿Está garantizada la comunicación?

## RECOMENDACIONES FINALES

- El equipo asistencial para un programa de TADE en HAD es, por sus características especiales, multidisciplinar, y está compuesto por personal médico, de enfermería, farmacéuticos, auxiliares y por el paciente y su cuidador (A-III).
- El factor fundamental para garantizar el éxito de un programa TADE es la adecuada selección de los pacientes (A-III).
- Para que el TADE sea seguro y efectivo, el paciente tiene que estar en situación de estabilidad clínica y hemodinámica y cumplir los criterios de ingreso generales y específicos de inclusión en un programa TADE (A-III).
- Las preguntas de High *et al.* resumen y valoran la adecuación del ingreso en un programa TADE (A-III).

## BIBLIOGRAFÍA

1. Sanroma P, Sampedro I, González CR, Baños MT. Recomendaciones clínicas y procedimientos en HAD. Sección VII. Capítulo 2. Imprenta Regional de Cantabria 2012. ISBN: 978-84-693-5969-3.
2. Poretz DM. Evolution of outpatient antibiotic therapy. *Infect Dis Clin North America* 1998; 1: 827-34.
3. Nolet BR. Patient selection in outpatient parenteral antimicrobial therapy. *Infect Dis Clin North America* 1998; 12: 835-48.
4. Estrada O. Análisis de los indicadores de seguridad y eficacia para la evaluación del programa de tratamiento antibiótico endovenoso de una Unidad de Hospitalización a Domicilio. Tesis doctoral. Departamento de Medicina. UAB 2010.
5. Esposito S, Noviello S, Leone S, Tice A *et al*., International OPAT Registry. Outpatient parenteral antibiotic therapy (OPAT) in different countries: a comparison. *International Journal of Antimicrobial Agents* 2004; 24: 473-8.
6. Mirón M, Estrada O, González Ramallo V. Protocolos de tratamiento antimicrobiano domiciliario (TADE). Capítulo I, Capítulo III. Editorial Elsevier 2008. ISBN: 978-84-691-3742-0
7. Tice AD, Nolet BR. Update on Outpatient Antimicrobial Therapy. *Home Health Care Consultant* 2001; 8: 22-9.
8. High KP. Outpatient Parenteral Antimicrobial Therapy: a long-overdue option for older adults. *JAGS* 2007; 55: 792-3.

## **CAPITULO 3. Modalidades de administración de antimicrobianos en TADE y accesos venosos. Complicaciones de los accesos venosos.**

**Autor: Mercè Gil Bermejo.** Hospital Universitario de Bellvitge. (Barcelona).

## INTRODUCCIÓN

El importante desarrollo tecnológico y farmacológico, alcanzado en la actualidad, permite la administración parenteral de la mayoría de antimicrobianos, tanto en forma de terapia única como combinada.

Un elemento clave del éxito del TADE radica en la acertada elección de la modalidad de administración, así como del tipo de acceso venoso, en función del antimicrobiano a administrar, duración del tratamiento y de las características y habilidades del paciente/cuidador<sup>1,2</sup>.

## MODALIDADES DE ADMINISTRACIÓN Y DISPOSITIVOS DE INFUSIÓN

La selección de una u otra modalidad de administración dependerá de las características del fármaco a infundir (estabilidad tras su dilución, perfil de seguridad, volumen mínimo de la dilución y número de dosis), de las características del paciente/cuidador y de los recursos disponibles en cada centro<sup>3,4</sup>.

Podemos distinguir entre las siguientes modalidades de administración:

- Vía intravenosa directa: hace referencia a la administración mediante jeringa de 10-20 ml en 3-5 minutos, del fármaco reconstituido. Requiere la presencia del personal sanitario y sólo será posible cuando lo permitan las características del fármaco.
- Infusión *por gravedad* del fármaco diluido en minibolsas. Es una modalidad sencilla y económica. A pesar de que habitualmente se utilizan con sistemas reguladores de flujo, la velocidad de infusión no es exacta y debe evitarse en aquellos fármacos que requieran una velocidad constante de infusión. Su facilidad de uso permite la autoadministración por el paciente y la familia tras un período de entrenamiento, lo que facilita su uso en terapias que precisan múltiples dosis, siempre y cuando la estabilidad del fármaco diluido a temperatura ambiente o en nevera lo permitan.
- Dispositivos de infusión electrónicos con multiprogramas: permiten tanto la infusión continua del antimicrobiano, cuando así se requiera, como la administración intermitente de varias dosis sin necesidad de colaboración del paciente/cuidador y con menor manipulación del acceso venoso. Permite así mismo, la dilución del fármaco en grandes volúmenes. En este tipo de dispositivos es imprescindible asegurar la estabilidad del fármaco tras su dilución a temperatura ambiente, como mínimo 24 horas.
- Dispositivos de infusión elastoméricos: se trata de unos dispositivos no-electrónicos, portátiles y desechables, constituidos por un globo hinchable o reservorio, habitualmente de silicona, rodeado por una carcasa protectora con un punto de inyección para la entrada de la medicación. Se dispone de distintos volúmenes de capacidad y distintas

velocidades de flujo lo que permite una amplia variedad de tiempos de perfusión, desde 30 minutos hasta 7 días<sup>5</sup>. Son de manejo muy sencillo y su uso en TADE, facilita la autoadministración tanto de antibióticos en perfusión continua, como de antibióticos en multidosis. Como en el caso anterior es imprescindible asegurar la estabilidad del fármaco tras su dilución a temperatura ambiente durante las horas que se calcule que dura la perfusión del elastómero.

Si el antimicrobiano tiene estabilidad de varios días a Tª de 2°C-8°C, es factible la preparación de varias dosis con anticipación y su conservación en nevera. Dado que el tiempo transcurrido desde la preparación hasta la administración del medicamento es un factor crítico de cara a la contaminación microbiológica de un medicamento, especialmente cuando se prepara fuera de las cabinas estériles<sup>6</sup>, se aconseja la preparación de estos los dispositivos en cámara de flujo laminar, para asegurar la estabilidad microbiológica de la dilución.

Es importante recordar que las bajas temperaturas enlentecen la velocidad de perfusión del elastómero y las temperaturas demasiado altas lo aceleran<sup>5</sup>. Por este motivo en el caso que se conserven refrigerados, se recomienda ponerlos a temperatura ambiente con la anticipación necesaria, habitualmente será suficiente con 30 minutos, dependiendo del volumen del infusor. Respecto a las temperaturas elevadas se debe tener especial cuidado con los dispositivos de perfusión continua en los meses del año más calurosos y considerar la necesidad de mantenerlos refrigerados, por ejemplo, con bolsas de gel frío, mientras se está administrando la perfusión.

También hay que tener en consideración la posible fotosensibilidad del fármaco, procurando una adecuada protección de la luz en caso necesario.

La autoadministración se ha demostrado una forma segura y eficaz en el TADE y facilita la asociación simultánea de dos o más antibióticos, lo que a veces es esencial en el tratamiento de infecciones por gérmenes multirresistentes, permitiendo realizar TADE complejo en el domicilio del paciente<sup>7-10</sup>.

En dicho modelo de autoadministración, se recomienda asegurar el adecuado entrenamiento del cuidador en la técnica de administración del fármaco. Se ha demostrado de gran utilidad facilitar soporte gráfico al paciente y/o cuidador sobre el manejo de la conexión y desconexión del antibiótico (Ver figura 1).

## **ELECCIÓN DEL ACCESO VENOSO**

La adecuada elección del acceso venoso es clave para el éxito del TADE y dependerá de las características del fármaco a infundir (osmolaridad, pH y

capacidad vesicante), número de dosis diarias, duración del tratamiento y las características propias del paciente<sup>11-14</sup>.

Los catéteres venosos se pueden clasificar en periféricos (CVP) ya sean cortos o medios y en centrales (CVC), que a su vez pueden ser de inserción periférica (CCIP), central no tunelizado, central tunelizado o con reservorio totalmente implantado (Tabla 2).

### **Tipos de accesos venosos y características principales**

- CVP corto es aquel cuya longitud no sobrepasa los 8 cm, usualmente se insertan en las venas de la mano y de antebrazo. Se aconseja su uso en terapias de menos de 7 días de duración.
- CVP de línea media es un dispositivo de acceso venoso periférico entre 7.6 a 20.3 cm de longitud. Se inserta por vía antecubital hasta el segmento proximal de la vena basílica o cefálica. Dado que por su longitud no se sitúa en las venas centrales, no precisa control radiológico tras su colocación. Su duración no está bien determinada, aconsejándose su uso en terapias de 6 a 14 días de duración, aunque consta experiencia de su uso durante 4-6 semanas sin complicaciones<sup>15</sup>. Los CVP (tanto cortos como de línea media) no van a permitir la infusión de terapias vesicantes o con osmolaridad mayor >500-600 mOsm o pH <5 o >9.
- CVC es aquel cuyo extremo distal se localiza en el tercio proximal de la vena cava superior, aurícula derecha o vena cava inferior. Puede ser de una o varias luces. Se puede diferenciar entre los CVC de inserción central (no tunelizados, tunelizados y totalmente implantables) y los CCIP, que se insertan a través de la vena basílica, cefálica o braquial. En este caso todos los CVC permiten la administración de terapias vesicantes y/o con osmolaridad mayor >500-600 mOsm y/o pH <5 o >9.

### **Elección del acceso venoso**

En cuanto a la elección del acceso venoso, se recomienda el uso de un CVP corto si la duración prevista de la terapia no excede los 6 días<sup>16</sup> y el uso de un CVP de

línea media en tratamientos de 1 a 2 semanas de duración, cuando las características del fármaco y del paciente lo permitan. Una segunda opción en este caso sería la colocación de un CCIP (Tabla 3). Por otro lado, se desaconseja la administración de fármacos directamente con aguja removible, por el riesgo de extravasación.

En terapias de más larga duración (>2-4 semanas) o con fármacos altamente fleboirritantes se aconseja la utilización de un CVC:

- Se aconseja colocación de CCIP o CVC tunelizado si se prevé que la terapia se prolongará más de 15-30 días, para minimizar el riesgo de bacteriemia asociada a catéter. Se debe evitar el uso de CVC no tunelizado para terapia de más de 30 días<sup>17</sup>
- En el caso de pacientes sometido a hemodiálisis (HD) o con insuficiencia renal crónica candidatos a HD deben tenerse en cuenta las siguientes consideraciones:
  - El uso de CCIP en pacientes con insuficiencia renal es controvertido debido al riesgo de trombosis venosa o estenosis, que podría complicar las opciones de acceso venoso a largo plazo<sup>18</sup>. Por este motivo en un reciente documento de consenso sobre el correcto uso de los CCIP<sup>17</sup> se desaconseja su utilización en pacientes con insuficiencia renal crónica estadio 3b (Filtrado Glomerular < 45ml/min) y que sean posibles candidatos a HD, recomendando la utilización de catéteres periféricos colocados en el dorso de la mano en TADE de duración < 6 días y CVC tunelizados en caso de duración mayor.
  - También queda desaconsejado el acceso de vena subclavia por alto riesgo de estenosis a este nivel <sup>19,20</sup>.

El pH, la osmolaridad y la capacidad irritativa propia del fármaco, determinarán finalmente su mayor o menor capacidad vesicante. Se deberá valorar el sumatorio de estos tres factores, junto con el número dosis diarias y tiempo previsto de tratamiento, para la correcta elección del acceso venoso. Se tendrá en cuenta también la disponibilidad de catéteres de cada centro.

En la Tabla 3 se resume una aproximación para una correcta elección del acceso venoso.

En el caso de pacientes con insuficiencia renal crónica en HD o candidatos a HD, se aconseja evitar CCIP y acceso subclavio. Una alternativa podría ser catéter yugular tunelizado para terapias prolongadas. Se aconseja consensuar el acceso venoso con el nefrólogo.



## **Frecuencia de recambio de los catéteres utilizados**

En el CVP corto no se ha demostrado que el recambio programado con una frecuencia superior a 72-96 hora reduzca las tasas de infección o flebitis<sup>16,21,22</sup>. Un reciente metaanálisis concluye incluso que no se evidencia beneficio entre el cambio rutinario del catéter o el que se practica por criterio clínico tanto en el ámbito hospitalario como en el domiciliario<sup>23-25</sup>.

En el resto de catéteres, incluidos los de línea media, sólo se aconseja su recambio por criterios clínico<sup>16</sup>.

## **COMPLICACIONES RELACIONADAS CON EL USO DE CATÉTERES**

Las complicaciones más comunes relacionadas con el uso catéteres venosos son la obstrucción, la flebitis y la extravasación. Con menor frecuencia se puede producir la fragmentación o migración del catéter, la trombosis o perforación de la vena, o la ulceración y celulitis en el lugar de inserción.

Sin embargo, las complicaciones que comportan un mayor riesgo y se asocian con un mayor consumo de recursos son las infecciones relacionadas con el uso de catéteres, tanto locales como sistémicas, entre ellas destaca la bacteriemia relacionada con el catéter vascular (BRCV), por la morbilidad que implica.

La incidencia de BRCV varía en función del tipo de catéter, de su frecuencia de manipulación y de los factores relacionados con el huésped (enfermedad de base o estado clínico crítico).

### **BRCV y tipo de catéter**

Según los resultados de una revisión sistemática de 200 estudios prospectivos, la tasa de incidencia de BRCV/1000 días de catéter es menor en los CVP que en los CVC y, entre los periféricos, es menor en los de línea media que en los cortos con una tasa de BRCV de 0,2 y 0,5 respectivamente<sup>26</sup>.

Respecto a los CVC la tasa de BRCV es menor en los totalmente implantados con tasa de 0,1 y en los tunelizados con tasas 1,6 y es mayor en CCIP y CVC no tunelizados, que registran tasas de 2,1 y 2,7 respectivamente.

En otro estudio prospectivo se registraron tasas similares de BRCV en CCIP y en CVC (de 2.3 vs 2.4 x 1000 días de catéter), aunque hay que destacar que el tiempo transcurrido hasta el desarrollo de la infección fue significativamente más largo en los pacientes con CCIP (23 vs 13 días,  $p = 0,03$ )<sup>27</sup>.

Aunque en general los CVP se asocian a un riesgo de infección mucho menor que los CVC, ocasionan sin embargo una gran morbilidad por la frecuencia con la que se usan.

- BRCV y número de luces: A mayor número de luces y más días de catéter más riesgo de infección, por lo que se recomienda el uso del menor número de luces suficientes para el manejo del paciente y retirar el catéter tan pronto como ya no sea preciso su uso<sup>16</sup>.
- BRCV y técnica de inserción: En cuanto a la técnica de inserción de los CVC, es preferible la inserción guiada por ecografía siempre que sea posible, porque ha demostrado disminuir el número de intentos de canulación y de complicaciones mecánicas<sup>16,28</sup>.
- BRCV y lugar de inserción: Por otro lado, el lugar de inserción de los catéteres puede influir en el riesgo de aparición de infecciones. Así, los catéteres colocados en las venas femorales o yugulares tienen un riesgo superior de colonización y de infección que los insertados en las venas subclavias. Los catéteres colocados en las venas periféricas o en venas centrales con inserción periférica tienen también un riesgo inferior.
- BRCV y material de composición del catéter: La capacidad trombogénica de los catéteres y su composición influyen en la capacidad de desarrollar infecciones relacionadas. Los catéteres de teflón o poliuretano se asocian con menos complicaciones infecciosas que los catéteres de clorhidrato de polivinilo o polietileno.

Se conoce también que ciertos microorganismos, especialmente *estafilococos* y especies del género *Candida*, tienen mayor capacidad de adherirse a los catéteres de polivinilo que a los fabricados con teflón<sup>29</sup>.

### **Complicaciones relacionadas con el uso de catéteres vasculares en domicilio**

En cuanto al riesgo de complicaciones de los catéteres vasculares en domicilio, la amplia experiencia de la antibioterapia parenteral domiciliaria confirma que las complicaciones relacionadas con el uso de catéteres en TADE son similares a las reportadas en el uso hospitalario y en pocas ocasiones obliga al reingreso del paciente. Según datos facilitados por el Registro TADE español se registró una tasa de complicaciones relacionadas con el acceso venoso causantes de traslado al hospital y/o de modificación o suspensión del tratamiento antibiótico de 1,4/1000 días de tratamiento antibiótico en domicilio; con una tasa de incidencia de BRCV de 0,04/1000 días de tratamiento<sup>30</sup> (tabla 4). Esta tasa es menor que la reportada en un programa de vigilancia hospitalaria de nuestro medio, que detecta tasas que oscilan entre 0,36 episodios/1000 días de

hospitalización en los hospitales con mayor número de camas y de 0,09/1000 días de hospitalización en los de menor número de camas<sup>31</sup>.

## RECOMENDACIONES FINALES

- Un elemento clave para el éxito del TADE radica en la acertada elección de la modalidad de administración, así como del tipo de acceso venoso, en función del antimicrobiano a administrar, duración del tratamiento y de las características y habilidades del paciente/cuidador (A-III).
- La autoadministración se ha demostrado una forma segura y eficaz en el TADE y facilita la asociación simultánea de dos o más antibióticos (A-II).
- Si el antimicrobiano tiene estabilidad de varios días a Tª de 2°C-8°C, es factible la preparación de varias dosis con anticipación y su conservación en nevera. En estos casos, se aconseja la preparación de los dispositivos de infusión en cámara de flujo laminar para asegurar la estabilidad microbiológica de la dilución (A-III).
- La adecuada elección del acceso venoso es clave para el éxito del TADE y dependerá de las características del fármaco a infundir, número de dosis diarias, duración del tratamiento y las características propias del paciente (A- III).
- Los catéteres venosos periféricos (CVP), tanto cortos como de línea media, no están recomendados para la administración de terapias vesicantes o con osmolaridad >500-600 mOsm y/o pH <5 ó >9 (A-III).
- Los CVP cortos se recomiendan cuando la duración prevista del TADE sea inferior a 7 días. (B-III).
- Los CVP de línea media se recomiendan en TADE de duración entre 7 y 14 días. (B-III).
- Los catéteres venosos centrales (CVC), ya sean catéteres centrales de inserción periférica (CCIP) o de inserción central se recomiendan para la administración de terapias vesicantes o con osmolaridad >500-600 mOsm y/o pH <5 ó >9 (A-III).
- Los CCIP se recomiendan cuando la duración prevista del TADE sea superior a 15 días. (B-III).
- Se desaconseja el uso de CCIP en pacientes con insuficiencia renal crónica estadio 3b (Filtrado Glomerular < 45ml/min) y que sean posibles candidatos a hemodiálisis (A-II).

- Se desaconseja asimismo el acceso de vena subclavia en pacientes con insuficiencia renal crónica estadio 3b (Filtrado Glomerular < 45ml/min) y que sean posibles candidatos a hemodiálisis (A-I).
- Se recomienda que el recambio del CVP corto se haga según criterio clínico o de forma programada cada 72-96 horas con la finalidad de reducir las tasas de infección o flebitis (B-I).
- En el resto de catéteres, incluidos los de línea media, sólo se aconseja su recambio por criterios clínico (A-III).
- Las complicaciones relacionadas con el uso de catéteres en TADE son similares a las reportadas en el uso hospitalario y en pocas ocasiones obliga al reingreso del paciente (A-III).

## BIBLIOGRAFÍA

1. Gorski LA. Integrating standards into practice—revised standards for home care infusion: what has changed? *Home Heal Nurse* 2006; 24(10):627–31.
2. Tice AD, Rehm SJ, Dalovisio JR, Bradley JS, Martinelli LP, Graham DR, *et al.* Practice guidelines for outpatient parenteral antimicrobial therapy. IDSA guidelines. *Clin Infect Dis* 2004; 38(12):1651–72.
3. Seaton RA. Outpatient parenteral antibiotic therapy: principles and practice. *Eur J Intern Med* 2013; 24(7):617–23.
4. Paladino JA. Outpatient Parenteral Antimicrobial Therapy Today. *Clin Infect Dis* 2010; 15(51 Suppl 2):S198–208.
5. Baxter Corporation. Baxter Elastomeric Pumps: Clinician Guide. 2010 [Internet]. Available from: <http://www.capca.ca/wp-content/uploads/Baxter-Elastomeric-Pumps-Clinician-Guide11.pdf>
6. Ministerio de Sanidad. Guía de buenas prácticas de preparación de medicamentos en servicios de farmacia hospitalaria [Internet]. 2014. Available from: [http://www.sefh.es/sefhpdfs/GuiaBPP\\_JUNIO\\_2014\\_VF.pdf](http://www.sefh.es/sefhpdfs/GuiaBPP_JUNIO_2014_VF.pdf)
7. Matthews PC, Conlon CP, Berendt AR, Kayley J, Jefferies L, Atkins BL, *et al.* Outpatient parenteral antimicrobial therapy (OPAT): Is it safe for selected patients to self-administer at home? A retrospective analysis of a large cohort over 13 years. *J Antimicrob Chemother* 2007; 60(2):356–62.
8. Kieran J, O'Reilly A, Parker J, Clarke S BC. Self-administered outpatient parenteral antimicrobial therapy: a report of three years experience in the Irish healthcare setting. *Eur J Clin Microbiol Infect Dis* 2009; 28(11):1369–74.

9. Barr DA, Semple L SR. Self-administration of outpatient parenteral antibiotic therapy and risk of catheter-related adverse events: a retrospective cohort study. *Eur J Clin Microbiol Infect Dis* 2012; 31(10):2611–9.
10. Mujal A, Sola J, Hernandez M, Araguas C, Machado ML, Oristrell J. Eficacia y seguridad del tratamiento antibiotico domiciliario endovenoso en pacientes con patologia infecciosa procedentes del servicio de urgencias. *Emergencias* 2013; 25(1):31–6.
11. Williams DN, Rehm SJ, Tice AD, Bradley JS, Kind AC CW. Practice guidelines for community-based parenteral anti-infective therapy. ISDA Practice Guidelines Committee. *Clin Infect Dis* 1997; 25(4):787–801.
12. Gilbert DN, Dworkin RJ, Raber SR, Leggett JE C. Outpatient parenteral antimicrobial-drug therapy. *N Engl J Med* 1997; 337(12):829–38.
13. Pereira-da-Silva L, Henriques G, Videira-Amaral JM, Rodrigues R, Ribeiro L, Virella D. Osmolality of solutions, emulsions and drugs that may have a high osmolality: aspects of their use in neonatal care. *J Matern Fetal Neonatal Med* 2002; 11(5):333–8.
14. Stranz, M Kastango E. A Review of pH and Osmolarity. *Int J Pharm Compd* 2002; 6(3):216–20.
15. Infusion Nurses Society. Infusion nursing standards of practice. *J Infus Nurs* 2011; 34(Suppl 1):S1-109.
16. O’Grady NP, Alexander M, Burns LA, Dellinger EP, Garland J, Heard SO, *et al.* Guidelines for the Prevention of Intravascular Catheter-related Infections. *Clin Infect Dis* 2011; 52(9):e162-93.
17. Chopra V, Flanders SA, Saint S, Woller SC, O’Grady NP, Safdar N, *et al.* The Michigan appropriateness guide for intravenous catheters (MAGIC): Results from a multispecialty panel using the RAND/UCLA Appropriateness Method. *Ann Intern Med* 2015; 163(6 Suppl):S1–40.
18. Ters M El, Schears GJ, Taler SJ, Williams AW, Albright RC, Jenson BM, *et al.* Association between prior peripherally inserted central catheters and lack of functioning arteriovenous fistulas: a case-control study in hemodialysis patients. *Am J Kidney Dis* 2012; 60(4):601–8.
19. Schillinger F, Schillinger D, Montagnac R, Milcent T. Post catheterisation vein stenosis in haemodialysis: comparative angiographic study of 50 subclavian and 50 internal jugular accesses. *Nephrol Dial Transplant* 1991; 6(10):722–4.
20. Trerotola SO, Kuhn-Fulton J, Johnson MS, Shah H. Ambrosius, WT. Kneebone P. Tunneled infusion catheters: increased incidence of symptomatic venous

thrombosis after subclavian versus internal jugular venous access. *Radiology* 2000; 217(1):89–93.

21. KK L. Safety of prolonging peripheral cannula and i.v. tubing use from 72 hours to 96 hours. *Am J Infect Control* 1998; 26(1):66–70.

22. Lee WL, Chen HL, Tsai TY, Lai IC, Chang WC, Huang CH FC. Risk factors for peripheral intravenous catheter infection in hospitalized patients: a prospective study of 3165 patients. *Am J Infect Control* 2009; 37(8):683–6.

23. Webster J, Osborne S, Rickard CM NK. Clinically-indicated replacement versus routine replacement of peripheral venous catheters. *Cochrane Database Syst Rev*. 2015; (8):CD007798.

24. Rickard CM, Webster J, Wallis MC, Marsh N, McGrail MR, French V, *et al*. Routine versus clinically indicated replacement of peripheral intravenous catheters: a randomised controlled equivalence trial. *Lancet* 2012; 380(9847):1066–74.

25. Van Donk P, Rickard CM, McGrail MR DG. Routine replacement versus clinical monitoring of peripheral intravenous catheters in a regional hospital in the home program: A randomized controlled trial. *Infect Control Hosp Epidemiol* 2009; 30(9):915–9.

26. Maki DG, Kluger DM CC. The risk of bloodstream infection in adults with different intravascular devices: A systematic review of 200 published prospective studies. *Mayo Clin Proc* 2006; 81(9):1159–71.

27. Al Raiy B, Fakih MG, Bryan-Nomides N, *et al*. Peripherally inserted central venous catheters in the acute care setting: A safe alternative to high-risk short-term central venous catheters. *Am J Infect Control* 2010; 38(2):149–53.

28. Schweickert WD, Herlitz J, Pohlman AS, Gehlbach BK, Hall JB KJ. A randomized, controlled trial evaluating postinsertion neck ultrasound in peripherally inserted central catheter procedures. *Crit Care Med* 2009; 37(4):1217–21.

29. Raad I, Hanna H MD. Intravascular catheter-related infections: advances in diagnosis, prevention, and management. *Lancet Infect Dis* 2007; 7:645–57.

30. Grupo Español de Seguimiento del Tratamiento Antimicrobiano Domiciliario Endovenoso. Registro TADE. Informe de resultados 01-17 (del 04-07-2011 al 30-12-2016).

31. Almirante B, Limón E, Freixas N GFVincP. Laboratory-based surveillance of hospital-acquired catheter-related bloodstream infections in Catalonia. Results of the VINCat Program (2007-2010). *Enferm Infecc Microbiol Clin* 2012; 30(Suppl 3):13–9.

#### **CAPITULO 4. Características farmacocinéticas, farmacodinámicas y estabilidad de los fármacos administrados en TADE. Criterios de elección del antimicrobiano. Asociación simultánea de antibióticos en TADE.**

**Autores:** **Andima Basterretxea Ozamiz.** Hospital Universitario Cruces, Baracaldo (Vizcaya)

**Joan Solà Aznar.** Parc Taulí Hospital Universitari, Sabadell (Barcelona)

**María Victoria Gil Navarro.** Hospital Universitario Virgen del Rocío. (Sevilla)

**Sara Ortonobés Roig.** Parc Taulí Hospital Universitari, Sabadell (Barcelona)

#### **Características farmacocinéticas, farmacodinámicas y estabilidad de los antimicrobianos administrados en TADE:**

El conocimiento de las propiedades farmacocinéticas y farmacodinámicas del producto a infundir es uno de los aspectos más determinantes a la hora de elegir un antimicrobiano para su administración en un programa TADE, pues dichas características van a condicionar la modalidad de infusión (manual o mecánica) y la elección del acceso vascular<sup>1,2</sup>.

La estabilidad microbiológica del producto es el parámetro, y a su vez el limitante, más importante dentro del TADE pues va a condicionar en muchos casos la adopción de alternativas a la administración de los antimicrobianos como podría ser la utilización de bombas de infusión o requerir programas de autoadministración<sup>3</sup>. Hay que diferenciar la estabilidad del antibiótico reconstituido y una vez diluido (que pueden ser distintas), así como si la reconstitución y dilución se ha realizado en condiciones estériles en campana de flujo laminar o no. Si el antibiótico no se va a administrar de forma inmediata es recomendable preparar la dilución en campana de flujo laminar para una mayor estabilidad según la matriz de riesgo de la guía de buenas prácticas de preparación de medicamentos en los Servicios de Farmacia Hospitalaria<sup>4,5</sup>.

La semivida del producto condiciona la posología (dosis diarias a infundir), por lo que parecen idóneos para su utilización aquellos fármacos que por su larga vida media puedan administrarse en dosis única diaria ya que reducen las cargas de trabajo, se minimizan las complicaciones (infección de catéter secundaria a la manipulación de los accesos venosos) y ocasiona menos interferencias en las actividades del paciente. No obstante, en ocasiones, el tratamiento de gérmenes multirresistentes obliga a tratamientos con fármacos de vida media corta que exigen múltiples dosis al día.

Otras propiedades a tener en cuenta son el pH, la osmolaridad y la capacidad irritante del producto, de cara a minimizar potenciales complicaciones como es la flebitis química. No menos importantes van a ser el tipo de diluyente y la posible incompatibilidad con otros fármacos, por lo que se debe consultar siempre la ficha técnica del producto<sup>6-9</sup>.

En la Tabla 5 se presentan los antimicrobianos más comúnmente utilizados en TADE con las características más relevantes respecto del fármaco como son:

- La concentración recomendada
- El tipo de suero compatible
- La necesidad de proteger de la luz
- Las distintas opciones de administración (bolo directo, intermitente o en perfusión continua)
- El tiempo de infusión
- El riesgo de flebitis
- La posibilidad de emplear dispositivos alternativos de administración (infusores elastoméricos o bombas de infusión electrónicas)
- La estabilidad en bolsa de suero tanto en nevera como a temperatura ambiente, una vez reconstituida y diluida la preparación.

Para determinar la estabilidad en infusores elastoméricos se recomienda revisar los datos de los estudios de compatibilidad y estabilidad de cada una de las marcas comercializadas de elastómeros. Además, es necesario advertir que existen importantes diferencias sobre la estabilidad de un mismo fármaco, según las fuentes consultadas, tipos de estudios realizados y dependiendo de la presentación comercial.

Los antibióticos que necesitan mantenerse en frío para garantizar su estabilidad (como el meropenem) deberán ser transportados en frío a los domicilios de los pacientes (en nevera portátil o recipiente isotérmico) y mantenerse en frío en el domicilio del paciente (frigorífico). Habría que reseñar la importancia de la temperatura ambiente sobre la estabilidad del fármaco. La mayoría de estudios han sido realizados a 25°C y en no pocas situaciones de la vida cotidiana esta temperatura es superada en el entorno del paciente. Recientemente se ha publicado un trabajo<sup>10</sup> que analiza este aspecto, en relación a infusión mediante dispositivos elastoméricos, y concluye que antimicrobianos como cefazolina, cefepima y piperacilina-tazobactam son estables 24 horas a temperaturas de hasta 33°C y que cloxacilina pierde propiedades en un 11%.

Son numerosos los trabajos de investigación que se han publicado acerca de la administración de antibióticos betalactámicos en infusión continua o extendida. Los resultados obtenidos indican que podría tratarse de una estrategia terapéutica de gran utilidad en el tratamiento de la infección nosocomial, las agudizaciones de las infecciones pulmonares de pacientes con fibrosis quística y el tratamiento de la neutropenia febril. Desde el punto de vista



farmacodinámico, los antibióticos betalactámicos tienen un patrón de actividad dependiente del tiempo y es el tiempo durante el cual la concentración de antibiótico libre supera la concentración inhibitoria mínima del microorganismo responsable de la infección, el índice farmacocinético/farmacodinámico que mejor se correlaciona con la eficacia clínica. La administración de betalactámicos en infusión continua logra maximizar el citado índice, y además algunos estudios indican que podría resultar también ventajosa en término económicos<sup>11</sup>.

### **Criterios de elección del antimicrobiano**

La selección de los antimicrobianos constituye un apartado de enorme relevancia ya que presenta algunas singularidades respecto a la administración en las plantas del hospital<sup>12</sup>. En términos generales, se puede utilizar cualquier antimicrobiano para TADE, pero la prescripción de la pauta terapéutica más adecuada se verá influenciada por aspectos como:

- Tipo de infección y el/los microorganismos implicado/s
- La estabilidad de los fármacos
- Las condiciones del paciente (como patologías concomitantes o dificultad para el acceso venoso, las condiciones higiénicas del domicilio y el grado de colaboración del paciente y/o cuidador),
- Los recursos disponibles por parte de la Unidad de hospitalización a domicilio

En cualquier caso, deberíamos de tener siempre presentes las medidas genéricas para mejorar la prescripción de antimicrobianos<sup>13</sup>:

- Mejorar la adecuación del tratamiento antibiótico empírico.
- Optimización de la dosificación según los parámetros farmacocinéticos y farmacodinámicos de los antibióticos.
- Suspender precozmente el tratamiento antibiótico en los casos en que no se demuestre patología infecciosa.
- Favorecer el tratamiento dirigido con antibióticos del espectro más reducido posible.
- Evitar los tratamientos innecesariamente prolongados.
- Siempre que las condiciones clínicas del paciente lo permitan, utilizar la vía oral, tan pronto como sea posible.

### **Asociación simultánea de antibióticos en TADE**

En no pocas ocasiones se precisa la administración simultánea de antimicrobianos. Es el caso del tratamiento de patologías complejas como la

endocarditis, tratamiento de infecciones ocasionadas por microorganismos multirresistentes, entre otras.

En los próximos años se espera un notable incremento de infecciones por microorganismos multirresistentes, lo que obligará a pautas de antimicrobianos cada vez más complejas<sup>14</sup>. Es factible realizarlo de forma segura y eficaz en las unidades de hospitalización a domicilio<sup>15</sup>. Este tipo de tratamientos precisan una elección exquisita del acceso vascular, adecuación de los sistemas de infusión, y por regla general, requieren mayor dedicación por parte del equipo, o bien la autoadministración por parte del paciente y/o cuidador. La autoadministración del antimicrobiano por parte del paciente o cuidador es un método seguro si se realiza la formación adecuada<sup>16</sup>, y permite realizar TADE complejo (múltiples dosis y múltiples antibióticos) a un coste razonable. Cuando el TADE es de un solo antibiótico en múltiples dosis una alternativa son las bombas de infusión electrónicas.

Cuando se administre un antibiótico con riesgo alto de flebitis (ver Tabla) o TADE de forma prolongada, multidosis o asociando simultáneamente antimicrobianos, es aconsejable utilizar un acceso vascular de larga duración (catéter central de inserción periférica o port-a-cath). Los catéteres de línea media recientemente comercializados se presentan como una interesante alternativa a los catéteres centrales. Pueden canalizarse en el domicilio del paciente, su inserción no requiere comprobación radiológica y permiten tratamientos de hasta 6 semanas de duración. Su uso no estaría recomendado para infundir soluciones con un pH menor de 5, mayor de 9 y osmolaridad mayor de 500 mOsm.

Cuando sea necesario la administración de varios antimicrobianos en la misma bolsa de infusión o en "sistema en Y" es necesario consultar si existen estudios de estabilidad que lo permitan.

## RECOMENDACIONES FINALES

- Las propiedades farmacocinéticas y farmacodinámicas del antimicrobiano a infundir en un programa TADE van a condicionar la modalidad de infusión (manual o mecánica) y la elección del acceso vascular (B-II).
- Si el antimicrobiano no se va a administrar de forma inmediata es recomendable preparar la dilución en campana de flujo laminar (B-II)
- La autoadministración del antimicrobiano por parte del paciente o cuidador es un método seguro y permite realizar TADE complejo (múltiples dosis y múltiples antibióticos) y más eficiente (B-II).

- Las bombas de infusión electrónicas son dispositivos útiles en caso de administración de antimicrobianos en múltiples dosis (B-II).

A continuación, se presentan las principales fuentes bibliográficas recomendadas para consultar la estabilidad de las disoluciones de los antimicrobianos:

- Páginas web:
  - Fichas técnicas de la Agencia Española del Medicamento y Productos Sanitarios (AEMPS). Disponible en: <https://www.aemps.gob.es/cima/fichasTecnicas.do?metodo=buscar>
  - Base de datos Micromedex. Disponible en: <http://www.micromedexsolutions.com/>
  - Base de datos de estabilidad y compatibilidad: Stabilis. Disponible en: <http://www.stabilis.org/Monographie.php?Forme=Inyectables&codeLangue=SP-sp-IV dilution guidelines. McAnley DF. Disponible en: http://www.globalrph.com>
- Revisiones publicadas:
  - Gaspar Carreño M et al. Medicamentos de administración parenteral: recomendaciones de preparación, administración y estabilidad. Farm Hosp. 2014; 38(6):461-467
  - F. J. Candel, et al. Current status in outpatient parenteral antimicrobial therapy: a practical view. Rev Esp Quimioter 2016; 29(2):55-68
- Libros: Trissel LA. Handbook on Inject. Drugs. 17th Ed. Bethesda. American Society of Health-System Pharmacist; 2013.
- Aplicaciones: Guía de Administración de medicamentos vía parenteral del Hospital Son Espases publicada en App Store. Guía Parenteral. Guía GAP ed. 2016

## BIBLIOGRAFIA

1. Mirón Rubio M, Estrada Cuxart O, González Ramallo VJ. Tratamiento antimicrobiano domiciliario endovenoso. Madrid: Elsevier-Doyma 2008; 77-86.
2. Tice AD, Rehm SJ, Dalovisio JR, Bradley JS, Martinelli LP, Graham DR, et al. Practice guidelines for outpatient parenteral antimicrobial therapy. IDSA guidelines. *Clin Infect Dis* 2004; 38(12):1651-72.
3. Matthews PC, Conlon CP, Berendt AR, Kayley J, Jefferies L, Atkins BL, et al. Outpatient parenteral antimicrobial therapy (OPAT): is it safe for selected patients to self-administer at home? A retrospective analysis of a large

- cohort over 13 years. *The Journal of antimicrobial chemotherapy* 2007; 60(2):356-62.
4. Casaus Lara ME, Tamo Fernández ML, Martín de Rosales Cabrera AM, García Salom P, López Cabezas C, *et al.* Guía de Buenas Prácticas de preparación de medicamentos en Servicios de Farmacia Hospitalaria. Ministerio de Sanidad, Servicios Sociales e Igualdad. Junio1014.
5. Gaspar Carreno M, Torrico Martin F, Novajarque Sala L, Batista Cruz M, Ribeiro Goncalves P, Porta Oltra B, *et al.* Medicamentos de administración parenteral: recomendaciones de preparación, administración y estabilidad. *Farmacia Hospitalaria* 2014; 38(6):461-467.
6. Trissel LA. Handbook on Inject. Drugs. 17th Ed. Bethesda. American Society of Health-System Pharmacist; 2013.
7. Fichas técnicas de la AEMPS. Disponible en: <https://www.aemps.gob.es/cima/fichasTecnicas.do?metodo=buscar>. Fecha de última consulta: Abril 2017.
8. Base de datos de estabilidad y compatibilidad: Stabilis. Disponible en: <http://www.stabilis.org/Monographie.php?Forme=Injectables&codeLanguage=SP-sp>. Fecha de última consulta: Abril 2017.
9. Base de datos Micromedex. Disponible en: <http://www.micromedexsolutions.com/>. Fecha de última consulta: Abril 2017.
10. Voumard R, Van Neyghem N, Cochet C, Gardiol C, Decosterd L, Buclin T, *et al.* Antibiotic stability related to temperature variations in elastomeric pumps used for outpatient parenteral antimicrobial therapy (OPAT). *J Antimicrob Chemother* 2017. doi: 10.1093/jac/dkw582
11. López E, Soy D, Miana MT, Codina C, Ribas J. Algunas reflexiones acerca de la administración de antibióticos betalactámicos en infusión continua. *Enfermedades infecciosas y microbiología clínica*. 2006 Aug-Sep;24(7):445-52.
12. Paladino JA, Poretz D. Outpatient parenteral antimicrobial therapy today. *Clinical infectious diseases*. 2010; 51 Suppl 2:S198-208
13. Rodríguez-Bano J, Pano-Pardo JR, Alvarez-Rocha L, Asensio A, Calbo E, Cercenado E, *et al.* Programas de optimización de uso de antimicrobianos (PROA) en hospitales españoles: documento de consenso GEIH-SEIMC, SEFH y SEMPSPH. *Enfermedades infecciosas y microbiología clínica*. 2012; 30(1):22 e1- e3.
14. O'Neill J. Tackling drug-resistant infections globally: Final Report and Recommendations. *Review on Antimicrobial Resistance* 2016.
15. Mújal A, Sola J, Hernandez M, Villarino MA, Machado ML, Baylina M, *et al.* Safety and effectiveness of home intravenous antibiotic therapy for multidrug-resistant bacterial infections. *European journal of clinical microbiology & infectious diseases*. 2015; 34(6):1125-33.
16. Barr DA, Semple L, Seaton RA. Self-administration of outpatient parenteral antibiotic therapy and risk of catheter-related adverse events: a

retrospective cohort study. *European journal of clinical microbiology & infectious*. 2012; 31(10):2611-9.

17. Medicamentos peligrosos. Medidas de prevención para su preparación y administración. Instituto Nacional de Seguridad e Higiene en el Trabajo (INSHT). Disponible en: <http://www.insht.es/InshtWeb/Contenidos/Documentacion/FICHAS%20DE%20PUBLICACIONES/EN%20CATALOGO/Higiene/2016%20medicamentos%20peligrosos/Medicamentos%20peligrosos.pdf>. Fecha de última consulta: noviembre 2017.

## **CAPITULO 5. Monitorización de los pacientes en TADE. Interacciones farmacológicas. Efectos adversos. Manejo de las complicaciones del TADE.**

**Autores:** Eulalia Villegas Bruguera. Hospital Dos e Maig. Barcelona.

Eva Llobet Barberí. Hospital Dos de Maig. Barcelona.

### **INTRODUCCIÓN**

El TADE implica un menor seguimiento clínico directo del paciente respecto a la hospitalización convencional, por lo que son necesarias directrices claras e individualizadas de monitorización durante la terapia, así como un correcto conocimiento de las posibles complicaciones derivadas de la misma. El circuito de respuesta de los profesionales, y la forma de derivación y reingreso en caso necesario deben ser ágiles y estar claramente protocolizados, para evitar retrasos y riesgos innecesarios.

A continuación, se describen las principales interacciones farmacológicas de los antibióticos utilizados en TADE, sus principales efectos adversos y las recomendaciones de manejo de los mismos

### **Interacciones farmacológicas**

En los pacientes con TADE, las interacciones de los antibióticos con otros fármacos pueden ser muchas y muy variadas. Estas interacciones se producen a través de diversos mecanismos, aunque el más conocido es la interacción enzimática<sup>1</sup> (generalmente la CYP450). La inhibición de los grupos enzimáticos, la más habitual, provocará el aumento de las concentraciones del fármaco, mientras que la inducción enzimática implica la disminución de dicha concentración. Por otra

parte, muchos antibióticos no admiten su mezcla en la misma solución con otros fármacos (incompatibilidad química o farmacotécnica).

A continuación, se describen las interacciones más relevantes por grupos de antibióticos:

1. Aminoglucósidos. No deben mezclarse en la misma solución con otros fármacos porque se inactivan, en especial con penicilinas. Aumentan los efectos de anticoagulantes orales. En combinación con diuréticos del asa potencian la ototoxicidad, y la nefrotoxicidad al combinarse con otros fármacos nefrotóxicos (anfotericina B, ciclosporina, colistina). La asociación con otros antimicrobianos se realiza para ampliar el espectro y mejorar el sinergismo en infecciones severas (*Pseudomonas*, *Klebsiella*), especialmente con penicilinas y cefalosporinas.
2. Tetraciclinas. Incrementan la nefrotoxicidad provocada por las tiazidas y anestésicos generales como el metoxifluorano. La vida media de las tetraciclinas puede disminuir drásticamente en combinación con barbitúricos, fenitoina o carbamazepina, por activación de enzimas microsomales.
3. Clindamicina. Potencia el efecto bloqueante neuromuscular de aminoglucósidos. Químicamente incompatible con ampicilina, fenitoína, barbitúricos, aminofilina, gluconato de calcio y sulfato de magnesio<sup>2</sup>.
4. Sulfamidas (cotrimoxazol). Potencia la acción de antiagregantes e hipoglucemiantes.
5. Glucopéptidos. Cuando se administran con drogas oto o nefrotóxicas, especialmente aminoglucósidos, deben monitorizarse frecuentemente la función y niveles plasmáticos y ajustar dosis en consecuencia.
6. Metronidazol. Inhibe el metabolismo de anticoagulantes orales, aumentando y prolongando su acción.
7. Quinolonas. Inhiben el metabolismo de la teofilina. Interaccionan con anticoagulantes orales. Químicamente incompatibles con furosemida.
8. Carbapenems, disminuyen los niveles de ácido valproico.

### **Efectos adversos más frecuentes de los antibióticos usados en TADE**

Las reacciones adversas medicamentosas (RAM) previsibles pueden aparecer en cualquier individuo, suelen ser dosis-dependientes y se relacionan con la propia acción farmacológica del antibiótico (por ejemplo, la nefrotoxicidad de los aminoglucósidos). Su detección puede implicar un cambio en la monitorización

(por ejemplo, titulación de niveles plasmáticos y controles de la función renal), y en ocasiones incluso la retirada del fármaco.

Aunque las RAM más habituales entre casi todos los grupos antibióticos de TADE son las erupciones cutáneas, seguidas de las náuseas y dispepsias, determinados grupos antibióticos se relacionan con RAM más concretas<sup>3</sup>. Es el caso de la nefrotoxicidad y ototoxicidad de los aminoglucósidos, que pueden ser minimizadas con la administración en dosis única diaria a dosis ajustadas al filtrado glomerular. En la tabla 1 se comparan las RAM previsibles más relevantes de los principales grupos de antibióticos de TADE.

Además de los controles analíticos básicos semanales (hemograma y parámetros bioquímicos descritos previamente), según el perfil del paciente y del fármaco que estemos utilizando en TADE deberán realizarse test específicos, como la determinación de niveles farmacológicos (vancomicina, aminoglucósidos), la creatinina (CPK) en pacientes en tratamiento con daptomicina, o del perfil hepático si se administran quinolonas o carbapénems.

A continuación, se enumeran las RAM más destacables según el órgano diana:

- Reacciones de hipersensibilidad/alergia. Las más conocidas son con los beta-lactámicos, hasta en el 10% de los casos (5% con penicilinas, 5-10% de éstos también a cefalosporinas y/o carbapenems)<sup>4</sup>, y pueden oscilar desde urticaria o prurito leves hasta muy graves (síndrome de Stevens-Johnson). Excepto en casos leves y sin otras opciones terapéuticas, es aconsejable retirar el antibiótico y pautar otro sin reacciones cruzadas. Paralelamente y en caso necesario puede darse tratamiento local o sistémico (antihistamínicos, corticoides...) según su intensidad<sup>5</sup>. En algunos casos es aconsejable administrar previamente un antihistamínico, y enlentecer la administración del antibiótico. La posibilidad de fotosensibilidad (quinolonas) hace aconsejable evitar la exposición solar.
- Nefrotoxicidad: La más conocida es por aminoglucósidos (20% de los casos, que aumenta hasta el 50% en tratamientos de más de 10-14 días) y vancomicina (pueden ser reversibles), anfotericina B convencional (que puede provocar también hipokaliemia e hipomagnesemia, como anfotericina B liposomal, menos nefrotóxica) y por colistina (a dosis terapéutica es nefrotóxica en más del 25% de los casos y potencialmente irreversible)<sup>6</sup>, por lo que en los tratamientos de más de 3 días se aconseja monitorizar los niveles de fármaco y la función renal (y de potasio y magnesio si anfotericina B) y ajustar dosis o retirar el fármaco si es necesario. Además, es aconsejable mantener una correcta hidratación y valorar añadir calcioantagonistas<sup>7</sup>.

- **Ototoxicidad:** En el caso de tratamiento con aminoglucósidos, irreversible. Se aconsejan tratamientos de corta duración, y valorar realizar controles con audiometría de alta frecuencia.
- **Efectos en sistema nervioso:** Cuando se emplean aminoglucósidos se han de valorar antecedentes de miastenia gravis, hipomagnesemia, hipocalcemia, uso de relajantes musculares, por riesgo de bloqueo neuromuscular, en especial con administración rápida en bolo. Los beta-lactámicos, y especialmente carbapenems, pueden provocar crisis convulsivas, debido a su estructura similar al GABA, con el que compiten. Además de retirar el fármaco, puede ser necesario el uso de anticonvulsivantes, siendo de primera elección las benzodiacepinas<sup>8</sup>. Para evitar la miopatía por daptomicina se recomienda monitorizar semanalmente las CPK. Linezolid puede causar un síndrome serotoninérgico si se suma a agentes serotoninérgicos (IRSS). La colistina provoca neurotoxicidad dosis dependiente, efecto curarizante capaz de inducir parálisis respiratoria.
- **Alteraciones hematológicas:** Todos los grandes grupos de antibióticos empleados en TADE pueden provocar alteraciones de una o varias series hematológicas, por lo que, como ya se ha comentado, siempre es aconsejable realizar controles semanales de hemograma<sup>9</sup>. La anemia hemolítica está descrita sobretodo asociada al uso de cefalosporinas. En el caso de betalactámicos como los carbapénems, los aminoglucósidos y quinolonas se han descrito agranulocitosis. Está descrita la eosinofilia asociada a betalactámicos y sulfamidas, sin repercusión clínica o incluso un síndrome DRESS). Pueden aparecer trombocitopenias en tratamientos con vancomicina y linezolid (especialmente a partir de la segunda semana). Algunos antibióticos, como las quinolonas, pueden presentar interacciones con anticoagulantes orales.
- **Alteraciones intestinales.** La clindamicina induce diarreas con cierta frecuencia. La diarrea por *Clostridium difícil* puede asociarse a cualquier antibiótico. Debe llevarse a cabo la retirada del fármaco lo antes posible, y realizar tratamiento con metronidazol o vancomicina oral en función de la gravedad del proceso.

### **Monitorización y control de los pacientes en TADE. Recomendaciones generales**

Aproximadamente el 25% de los pacientes en TADE padecerán algún efecto secundario derivado del mismo, que condicionará la retirada y cambio del mismo hasta en el 10% de los casos<sup>10</sup>. Debe advertirse a los pacientes/cuidadores de la posibilidad de precisar reingreso en el centro hospitalario si aparecen complicaciones de manejo imposible en el domicilio (en el 4-8% de los casos según las series publicadas)<sup>11</sup>.



Una vez iniciado el TADE, y partiendo de la base de una visita diaria como máximo, la monitorización del paciente debe individualizarse atendiendo a diferentes factores:

1. El perfil clínico (situación clínica actual, comorbilidad a controlar durante el TADE)
2. El perfil de seguridad del antibiótico escogido (interacciones, efectos adversos). Por ejemplo, en el caso de los aminoglucósidos, deben vigilarse los síntomas otológicos y vestibulares.
3. La estabilidad del fármaco una vez reconstituido y diluido, que permita una visita cada 24 o 48 horas
4. La posología y forma de administración del TADE escogido (autoadministración, bomba elastomérica, bomba de infusión eléctrica, dosis diaria administrada por el equipo HAD), que implicará también visita del equipo diaria o cada 48h
5. La capacidad del entorno cuidador.

Con independencia del fármaco que decida utilizarse, deben seguirse las siguientes pautas generales de actuación y control de los mismos:

- a) La selección del fármaco debe realizarse siguiendo las guías y recomendaciones de las sociedades médicas relevantes<sup>12</sup>
- b) El seguimiento evolutivo debe realizarse por miembros del equipo asistencial capacitados para la detección precoz de efectos adversos
- c) No es recomendable espaciar las visitas (médicas y/o de enfermería) más allá de cada 48 horas durante un tratamiento con TADE
- d) Todas las administraciones del fármaco deben quedar debidamente registradas en la documentación oficial del paciente
- e) La primera dosis de antibiótico debe ser administrada de forma supervisada adecuadamente por personal capacitado para manejar una posible reacción anafiláctica
- f) Es aconsejable la realización semanal de controles analíticos que incluyan hemograma, función renal, hepática (según paciente y fármaco utilizado) y proteína C reactiva (PCR). Si los parámetros se alteran, debe aumentarse la frecuencia de los controles. Según el fármaco utilizado (vancomicina, aminoglucósidos) se aconseja realizar niveles plasmáticos, en especial si se alteran parámetros analíticos (por ejemplo, función renal).

- g) El catéter para la administración del TADE debe ser revisado periódicamente (mínimo dos veces por semana los periféricos, semanalmente los centrales)

## RECOMENDACIONES FINALES

- Los efectos secundarios del TADE son relativamente frecuentes, y pueden obligar al retorno al centro hospitalario, por lo que los circuitos de detección y respuesta de los profesionales ante dichas complicaciones deben ser ágiles y estar claramente protocolizados (B-II).
- La monitorización debe individualizarse atendiendo al perfil clínico del paciente y su entorno cuidador, a las características del fármaco y a su forma de administración (A-III).
- Todo TADE debe realizarse siguiendo las guías y recomendaciones de las sociedades médicas relevantes, debe incluir una adecuada vigilancia clínica y analítica, y debe quedar correctamente registrada en la documentación del episodio (A-II).
- Los profesionales deben conocer las interacciones farmacológicas del TADE, ya que pueden provocar el aumento o disminución de la concentración de los medicamentos, los cambios en la efectividad de los fármacos en interacción (disminuyéndola o aumentándola), y/o la gravedad de sus efectos secundarios (A-II).
- Se recomienda la monitorización de las RAM previsibles (A-II). Por ejemplo, la realización de niveles valle de gentamicina para evitar la nefrotoxicidad o la determinación de la creatinin-fosfoquinasa durante la administración de daptomicina para reducir el riesgo de rabdomiolisis grave.
- Los profesionales de los equipos TADE deben proveerse del tratamiento necesario para afrontar una RAM potencialmente grave en el domicilio según el riesgo conocido de la misma (corticoides en los beta-lactámicos, anticonvulsivantes con los carbapenems entre otros) (A-III).
- Es aconsejable realizar controles analíticos semanales que incluyan un hemograma, función renal y hepática. (B-II).

## BIBLIOGRAFÍA

1. Lynch T, Pryce A. The effect of cytochrome P450 metabolism on drug response, interactions, and adverse effects. *Am Fam Physician* 2007; 76(3):391-6.

2. Clindamicina. Ficha técnica del Ministerio de Sanidad y consumo.  
[http://www.aemps.gob.es/cima/pdfs/es/ft/64426/FT\\_64426.pdf](http://www.aemps.gob.es/cima/pdfs/es/ft/64426/FT_64426.pdf)
3. Tice A, Rehm S, Dalovisio J *et al.* Practice guidelines for outpatient parenteral antimicrobial therapy. *Clin Infect Dis* 2004; 38:1651-72
4. Mar Marín M, Gudiol F. Antibióticos betalactámicos. *Enferm Infecc Microbiol Clin* 2003; 21(1):42-55
5. Garcia-Patos V, Garcia D. Toxicodermias. Protocolos de Dermatología de la AEP. 2007.<http://www.aeped.es/documentos/protocolos-dermatologia>
6. Pogue JM, Lee J, Marchaim D, *et al.* Incidence of and risk factors for colistin-associated nephrotoxicity in a large academic health system. *Clin Infect Dis* 2011; 53: 879-884.
7. Guías de la SEN. Actuación en el fracaso renal agudo. *Revista de Nefrología* 2007, vol. 27 supl. 3.
8. Miller A, Ball A, Bookstaver P, *et al.* Epileptogenic Potential of Carbapenem Agents. *Pharmacotherapy* 2011; 31(4):408-423.
9. Mintzer D, Billet S, Chmielewski L. Drug-induced hematologic syndromes. *Advances in Hematology* 2009; Volume 2009, Article ID 495863, 11 pages, doi:10.1155/2009/495863
10. Chapman A, Seaton R, Cooper M, Hedderwick *et al.* Good practice recommendations for outpatient parenteral antimicrobial therapy (OPAT) in adults in the UK: a consensus statement. *J Antimicrob Chemother* 2012; 67:1053-1062.
11. Chapman ALN, Dixon S, Andrews D *et al.* Clinical efficacy and cost effectiveness of outpatient parenteral antibiotic therapy (OPAT): a UK perspective. *J Antimicrob Chemother* 2009; 64: 1316.
12. Protocolos de tratamiento antimicrobiano domiciliario endovenoso (TADE). Sociedad Española de Medicina Interna. Coord.: M. Mirón, O. Estrada, VJ González. Elsevier Doyma, 2008 (Ed).

## CAPITULO 6. Consideraciones de TADE en pediatría

**Autor:** M<sup>a</sup> José Peláez Cantero. Hospital Materno-Infantil Carlos Haya. Málaga

### INTRODUCCIÓN

Clásicamente, y sobre todo en pacientes pediátricos, se ha asociado la administración de tratamientos intravenosos a la necesidad de ingreso hospitalario. Esta situación comienza a modificarse en 1974 cuando Rucker y Harrison *et al*<sup>1</sup> presentaron su experiencia clínica en relación con el tratamiento antibiótico domiciliario en niños con fibrosis quística. Desde esta fecha se ha demostrado con diferentes publicaciones, que se trata de un procedimiento eficaz y seguro que aporta beneficios tanto al paciente como a sus familiares y que goza de una buena relación coste-beneficio<sup>2-5</sup>.

La literatura específica sobre TADE en pediatría no es tan extensa como la literatura sobre el tratamiento ambulatorio de los adultos, y la mayoría hacen referencia a un número limitado de pacientes o están referidos a enfermedades concretas<sup>6,7</sup>. Publicaciones actuales ponen de manifiesto que las indicaciones más frecuentes de TADE en pediatría son para el tratamiento de infecciones óseas y articulares, infecciones relacionadas con el catéter, infecciones intraabdominales, infecciones de piel y tejidos blandos y reagudizaciones respiratorias en pacientes con fibrosis quística, obteniendo buenos resultados tanto en seguridad como en eficacia<sup>8-10</sup>.

Eficacia y seguridad son los criterios principales para la selección de los antimicrobianos<sup>11</sup>. En lo posible se eligen fármacos con largos intervalos de dosificación, estables, menor toxicidad y menor manipulación por parte del paciente. En cuanto a la elección del acceso venoso se aconseja seguir las mismas pautas que en el caso de los pacientes adultos sometidos a TADE y ya comentadas en el capítulo 3 de este documento de consenso<sup>12-14</sup>.

En cuanto a la administración del fármaco en otros países, el paciente debe acudir de manera diaria al servicio de urgencias para que una enfermera le administre el tratamiento, o bien una enfermera se desplaza diariamente al domicilio para la infusión del tratamiento<sup>15,16</sup>. En nuestro país un aspecto diferente en pediatría es que la administración puede ser llevada a cabo por parte de la enfermería o sus cuidadores. En el caso que los cuidadores sean los responsables de la administración del fármaco en domicilio se les enseña a la autoadministración de la medicación correspondiente y valoración de posibles incidencias durante el ingreso hospitalario. Tras un adecuado adiestramiento de la técnica, la comprobación de su realización correcta, y la administración de, al menos, una primera dosis intravenosa en el hospital, a fin de detectar posibles

reacciones de anafilaxia, se traslada al paciente a su domicilio para continuar con el tratamiento.

En la población pediátrica la seguridad del TADE debe ser uno de los aspectos más relevantes. Por eso debemos conocer el tipo y la frecuencia de las complicaciones de este tipo de terapia. Aproximadamente un tercio de los pacientes que reciben TADE van a presentar algún tipo de complicación, siendo las más frecuentes las asociadas al fármaco (erupción cutánea, neutropenia) y al catéter (infección, obstrucción, dislocación)<sup>2,17,18</sup>. Esto generará visitas domiciliarias no planificadas, consultas al servicio de Urgencias o el reingreso del paciente. Estudios recientes en adultos demuestran que la formación del equipo por un personal entrenado y la supervisión estrecha aumenta la seguridad del TADE<sup>19,20</sup>. Las complicaciones en los niños que reciben TADE plantean una preocupación por la rentabilidad real y la satisfacción del cuidador, que merece más estudio.

La tasa de curación global reportada por las diferentes publicaciones se sitúa entre el 89% y el 99%<sup>9,17,18,20</sup>.

## RECOMENDACIONES FINALES

- El TADE en pediatría proporciona mejor calidad de vida y mayor satisfacción para los pacientes y sus familias (A-I).
- El TADE en pediatría es efectivo y seguro en pacientes previamente seleccionados (B-II).
- La elección del antimicrobiano para TADE en pediatría debe seguir los mismos conceptos (farmacocinética, eficacia y seguridad) que para el paciente adulto (B-II).
- Los CVP cortos se recomiendan cuando la duración prevista del TADE sea inferior a 7 días. (B-III).
- Los CVP de línea media se recomiendan en TADE de duración entre 7 y 14 días. (B-III).
- Los CCIP se recomiendan cuando la duración prevista del TADE sea superior a 15 días. (B-III).
- Aunque la administración del antimicrobiano la realiza habitualmente personal de enfermería, tras un adecuado adiestramiento, puede ser llevada a cabo también por los cuidadores del paciente, de una forma eficaz y segura (C-III).

## BIBLIOGRAFÍA

1. Rucker RW, Harrison GM. Outpatient intravenous medications in the management of cystic fibrosis. *Pediatrics* 1974; 54:358-60.
2. Tice AD, Rehm SJ, Dalovisio JR, Bradley J, Martinelli L, Graham D, *et al.* Practice guidelines for outpatient parenteral antimicrobial therapy. *Clinical Infectious Diseases* 2004; 38:1651-72.
3. Barr DA, Semple L, Seaton RA. Outpatient parenteral antimicrobial therapy (OPAT) in a teaching hospital-based practice: a retrospective study describing experience and evolution over 10 years. *Int J Antimicrob Agents* 2012; 39:407-13.
4. Paladino JA, Poretz D. Outpatient parenteral antimicrobial therapy today. *CID* 2010;51 (Supl 2): 198-208.
5. Goenaga Sánchez MA, Garde Orbáiz C, Millet Sampedro M, Carrera Macazaga JA. Tratamientos antimicrobianos parenterales en domicilio. Experiencia de 5 años. *Rev Clin Esp* 2002; 202:142-7.
6. Van Winkle P, Whiffen T, Liu IL. Experience using peripherally inserted central venous catheters for outpatient parenteral antibiotic therapy in children at a community hospital. *Pediatr Infect Dis J* 2008; 27:1069-72.
7. Peláez Cantero MJ, Madrid Rodríguez A, Urda Cardona A, Jurado Ortiz A. Tratamiento antimicrobiano parenteral domiciliario: análisis prospectivo de los últimos 12 años. *An Pediatr (Barc)* 2014; 81:86-91.
8. Hodgson KA, Huynh J, Ibrahim LF, *et al.* *Arch Dis Child* 2016; 101:886–93.
9. Madigan T, Banerjee R. Characteristics and outcomes of outpatient parenteral antimicrobial therapy at an academic Children's Hospital. *Pediatr Inf Dis J* 2013; 38:346-9.
10. Wheeler AM, Heizer HR, Todd JK. Influence of culture results on management and outcome of pediatric osteomyelitis and/or septic arthritis. *J Ped Infect Dis* 2012; 1:152-6.
11. Moore DL, Bortulossi R. Home intravenous therapy: Accessibility for Canadian children and youth. *Paediatr Child Health* 2011; 16:105- 9.
12. Salcedo A, Girón RM, Beltrán B, Martínez A, Máiz L, Suárez L. Conferencia de consenso. Tratamiento antibiótico intravenoso domiciliario en la fibrosis quística. *Arch Bronconeumol* 2003; 39:469-75.

13. Buck C, Holl R, Kohne E, Wofl A. Silastic catheters for home antibiotics therapy in patients with cystic fibrosis. *Eur J Pediatr* 1997; 156:209-11.
14. Van Winkle P, Whiffen T, Amy Liu AL. Experience using peripherally inserted central venous catheters for outpatient parenteral antibiotic therapy in children at a Community Hospital. *Pediatr Infect Dis J* 2008; 27:1069–72.
15. Suau T, Piñera C, Díaz S, Troncoso R. Terapia antimicrobiana endovenosa ambulatoria: alternativa a la hospitalización en un servicio de urgencia pediátrico. *Rev Chil Infect* 2008; 25:374-8.
16. Esposito S, Noviello S, Leone S, Tice A, Seibold G, Nathwani D, *et al.* Outpatient parenteral antibiotic therapy (OPAT) in different countries: a comparison. *Int J Antimicrob Agents* 2004; 24:473-8.
17. [M](#), [Maraga N](#), [Alvarez A](#), [Rathore M](#). Complications of outpatient parenteral antibiotic therapy in childhood. *Pediatr Infect Dis J* 2001; 20:541-3.
18. [Le J](#), [San Agustin M](#), [Hernandez EA](#), [Tran TT](#), [Adler-Shohet FC](#). Complications associated with outpatient parenteral antibiotic therapy in children. *Clin Pediatr (Phila)* 2010; 49:1038-43.
19. Heintz BH, Halilovic J, Christensen CL. Impact of a multidisciplinary team review of potential outpatient parenteral antimicrobial therapy prior to discharge from an academic medical center. *Ann Pharmacother* 2011; 45:1329-37.
20. Shrestha NK, Bhaskaran A, Scalera NM, [Schmitt SK](#), [Rehm SJ](#), [Gordon SM](#). Contribution of infectious disease consultation toward the care of inpatients being considered for community-based parenteral anti-infective therapy. *J Hosp Med* 2012; 7:365-9.

## **CAPITULO 7: Programas de optimización de uso de antimicrobianos y programas TADE: una relación necesaria.**

**Autores:**      **Francisca Sánchez Martínez.** Hospital del Mar, Barcelona.

**Manuel Mirón Rubio.** Hospital Universitario de Torrejón, Torrejón de Ardoz. (Madrid)

**Pilar Retamar Gentil.** Hospital Universitario Virgen Macarena, Sevilla.

## INTRODUCCIÓN

Los objetivos de los Programas de Optimización de uso de Antimicrobianos (PROA) se resumen en el uso de la pauta antibiótica que aporta la mayor eficacia clínica posible y conlleva menores efectos colaterales<sup>1-2</sup>. Se consideran efectos colaterales las reacciones adversas medicamentosas, la selección de resistencias antimicrobianas y los gastos asociados que se deducen del uso de antimicrobianos. Los programas TADE comparten muchos de estos objetivos en cuanto que proporcionan la terapéutica más eficaz en situaciones en las que la vía oral no es deseable o posible, a la vez que minimizan los efectos adversos y gastos asociados al ingreso hospitalario. En muchas ocasiones los programas TADE actúan como elemento facilitador de la optimización de uso de antimicrobianos, permitiendo el tratamiento de infecciones por microorganismos multirresistentes (MMRR) cuando no existen alternativas orales disponibles, o en situaciones en las que, en relación al foco tratado, la vía intravenosa se asocia a una mayor eficacia clínica (Ej. endocarditis). Además, ambos programas comparten indicadores relacionados con la seguridad clínica del paciente como la incidencia de bacteriemia de catéter y de diarrea por *Clostridium difficile* (DCD). En este sentido, y para favorecer una mayor colaboración entre ambos programas, es deseable la representación del programa TADE en los equipos de PROA de los hospitales.

En los últimos años la disponibilidad de antibióticos con mayor vida media y la existencia de dispositivos de administración de terapia endovenosa ambulatoria han favorecido la creación de nuevas unidades de TADE. En ocasiones, los objetivos de ambos programas entran en conflicto. Esto ocurre en situaciones en las que se facilita el alta del paciente con una pauta antibiótica más estable o de dosificación más sencilla a expensas de antibióticos de mayor espectro del necesario (como es el caso de ceftriaxona, ertapenem, teicoplanina o daptomicina). El uso de estos antimicrobianos favorece la selección de microorganismos MMRR y el desarrollo de infecciones secundarias y diarrea por DCD. A pesar de ello, existe evidencia de que los pacientes incluidos en programas TADE no presentan mayor tasa de colitis por DCD<sup>3-4</sup>. Es probable que el entorno del paciente (domiciliario frente a hospitalario) disminuya la posibilidad de transmisión cruzada de microorganismos MR y este efecto resulte protector en la incidencia de infecciones por estos microorganismos.

A pesar de las peculiaridades de la administración de antibióticos en los programas TADE, la selección y forma de uso de los fármacos debe adaptarse a las directrices de los Grupos PROA de referencia. En ese sentido, la selección de fármacos debe adaptarse a las guías de tratamiento disponibles y favorecer siempre que sea posible la terapia secuencial a vía oral. En cuanto a la duración del tratamiento antibiótico, la facilidad de administración y la menor evaluación periódica de los tratamientos pueden concurrir en duraciones más prolongadas de lo deseable.



En este capítulo presentaremos la utilidad del TADE como elemento facilitador de los programas PROA y los elementos de optimización de uso de antimicrobianos que deben ser tenidos en cuenta en el seguimiento de pacientes incluidos en los programas TADE.

## **ELTADE COMO ELEMENTO FACILITADOR DE LOS PROA**

### **Optimización del tratamiento empírico: situaciones clínicas en las que no es deseable la vía oral**

Todas las infecciones agudas que, bien por la potencial agresividad del patógeno causal, por debutar como sepsis graves o por afectar a pacientes frágiles o con comorbilidades aconsejan el ingreso hospitalario, tienen indicación para tratamiento antimicrobiano parenteral. Además, situaciones concretas del huésped como los trastornos de la deglución o las alteraciones del nivel de conciencia, también aconsejan utilizar la vía parenteral. El TADE, cuando la situación clínica del paciente lo permita, es una forma segura y eficiente de completar cualquier pauta antibiótica en la que no sea deseable la vía oral<sup>5</sup>. En la Tabla 6 presentamos situaciones clínicas en las que se recomienda realizar un tratamiento intravenoso más allá de las 48-72 horas aun cuando el paciente esté estable o situaciones en los que es deseable un tratamiento intravenoso inicial y que permite plantear tratamiento TADE desde el diagnóstico<sup>6-7</sup>.

### **Optimización del tratamiento dirigido**

La ausencia de nuevas moléculas activas, especialmente frente a enterobacterias multirresistentes y microorganismos gramnegativos no fermentadores, dificulta la administración de tratamientos dirigidos adecuados. Los programas de TADE, además de reducir la presión de selección de microorganismos MMRR en el medio hospitalario y facilitar la liberación de camas de aislamiento, permiten realizar en domicilio el tratamiento antibiótico más adecuado mediante el uso controlado de antibióticos de mayor espectro antibacteriano (Tablas 6a y 6b)<sup>8</sup>. El TADE es, en este contexto, una oportunidad para optimizar el tratamiento de infecciones en situación de resistencia a los principales antibióticos. En cada caso se debe elegir, en consecuencia, el tratamiento de forma razonada y por consenso, adaptándolo a la estrategia PROA de cada hospital<sup>1-2</sup>.

## **OPORTUNIDADES PARA LA OPTIMIZACIÓN DEL USO DE ANTIBIÓTICOS EN EL SEGUIMIENTO DE PACIENTES INCLUIDOS EN PROGRAMA TADE**

La vía intravenosa se considera de elección en las infecciones graves y en aquellas que precisan hospitalización. Asegura una completa biodisponibilidad del fármaco y consigue de forma inmediata niveles séricos y tisulares en rango terapéutico. Sin embargo, el tratamiento antimicrobiano parenteral también presenta inconvenientes como son las reacciones medicamentosas adversas y complicaciones relacionadas con el uso del catéter.

La terapia secuencial permite acortar los tiempos de hospitalización (o de inclusión en un programa TADE, en nuestro caso), disminuir el tiempo de preparación del fármaco, reducir el coste del tratamiento, y en algunos casos disminuir los efectos adversos y complicaciones del tratamiento parenteral. Por el contrario, la terapia secuencial se ve limitada por situaciones en las que está comprometida la absorción oral.

La terapia secuencial no implica que deba utilizarse la formulación oral del mismo antimicrobiano administrado por vía parenteral. Si no existe formulación oral se puede utilizar un antimicrobiano con espectro equivalente. La terapia secuencial puede aprovecharse para simplificar el tratamiento de forma empírica o dirigida por cultivos.

### **El TADE como facilitador de la terapia secuencial**

La presión existente para reducir la estancia hospitalaria por su elevado coste puede llevar a un cambio precipitado del tratamiento a la vía oral, con el consiguiente riesgo de fracaso terapéutico y reingreso. En este sentido, los programas TADE permiten mantener, por su menor coste, el tratamiento por vía parenteral el tiempo necesario y realizar una terapia secuencial diferida y controlada.

En el tratamiento empírico, el TADE permite mantener el tratamiento por vía parenteral hasta conocer el resultado de los cultivos para posteriormente utilizar el tratamiento antimicrobiano oral ajustado a la susceptibilidad del microorganismo. Añadido a las ventajas anteriores, los TADE garantizan el tratamiento antimicrobiano inicial cuando existen dudas del cumplimiento terapéutico.

Una vez se considere indicado el paso a vía oral, los TADE deben seguir los criterios utilizados en los PROA para la terapia secuencial<sup>9</sup>. No existe un criterio universal para aplicar la terapia secuencial. Por ello, la decisión debe ser individualizada y basarse en los siguientes requisitos<sup>4</sup>:

- Relacionados con el paciente:
  - Mejoría de los síntomas y signos de infección
  - Estabilidad clínica y hemodinámica
  - Normalización o descenso de la temperatura
  - Normalización o descenso de los parámetros inflamatorios
  - Tolerabilidad al tratamiento oral
  - Absorción intestinal no comprometida
  - No indicación, por el tipo de infección, para continuar el tratamiento intravenoso
  
- Relacionados con el agente antimicrobiano oral:
  - Espectro antimicrobiano similar al agente intravenoso
  - Buena biodisponibilidad
  - Buena penetración en el lugar de la infección a concentraciones apropiadas
  - Buena tolerabilidad
  - Bajo potencial para la selección de resistencias

### **Riesgos del TADE para la realización de una adecuada terapia secuencial**

La utilización de la vía intravenosa puede prolongarse inadecuadamente en casos en los que:

- No existe un control y seguimiento correcto del paciente en el programa
- Los profesionales de los programas TADE no tienen una formación adecuada
- El TADE se utiliza como justificación para facilitar el alta del paciente del hospital en los casos en que ese alta es difícil por otros motivos (problemáticas sociales, inseguridad del paciente o familiares, etc.).

## **El TADE como alternativa a la terapia secuencial**

Existen situaciones en las que no es posible realizar una terapia secuencial a pesar de que la situación clínica del paciente aconseje el uso de la vía oral. Entre estas situaciones se encuentran: resistencias antimicrobianas, imposibilidad para la ingesta, alergias medicamentosas, historia de efectos adversos graves, síndrome de malabsorción, baja biodisponibilidad de los antimicrobianos y riesgo de incumplimiento terapéutico. En todos estos supuestos el TADE permite completar el tratamiento con garantía.

## **Optimización de la duración en los programas TADE**

Entre las consecuencias negativas de un uso inadecuadamente prolongado de los antibióticos se encuentran el mayor riesgo de toxicidad, la aparición de resistencias, la alteración de la microbiota y el sobrecrecimiento bacteriano, y el incremento del gasto<sup>10</sup>. Por este motivo, uno de las funciones de los PROA es vigilar que la duración del tratamiento antimicrobiano se adecúe a las guías de práctica clínica<sup>11</sup>. Un tratamiento antibiótico de corta duración debe considerarse en todo proceso infeccioso que presenta mejoría clínica excepto en los casos de inmunosupresión, pacientes graves, foco séptico no controlado o con complicaciones relacionadas (abscesificación), afectación de material protésico, escasa penetración del antibiótico en el lugar de la infección, y procesos causados por bacterias multirresistentes y de difícil tratamiento. En la actualidad existen numerosas evidencias de la eficacia de las terapias de corta duración frente a las de duración considerada estándar<sup>12</sup> (Tabla 7). En toda evaluación de pacientes candidatos a (o incluidos en) TADE debe realizarse una planificación inicial de la duración total del tratamiento basada en estas evidencias y la situación clínica del paciente que deberá ser revisada periódicamente.

Los programas TADE no pueden ser ajenos a esta realidad por lo que se impone la implantación de medidas de control sobre la duración del tratamiento antimicrobiano también en el ámbito ambulatorio. Algunos estudios sobre TADE han puesto de manifiesto duraciones de tratamiento muy por encima de los valores estándar, tanto en patologías concretas como en términos generales<sup>14</sup>. Entre las razones que explican esta mayor duración se encontraría el hecho de que muchas de las infecciones tratadas en los programas TADE son debidas a patógenos MR, ha habido fracasos con tratamientos previos, el foco de infección no está completamente controlado, o que las condiciones y características clínicas de los pacientes aconsejan realizar tratamientos de mayor duración. No obstante, la aplicación de medidas de control y seguimiento

puede contribuir a mejorar el uso de los antibióticos también en los programas TADE<sup>1</sup>.

## RECOMENDACIONES FINALES

- Se recomienda la pertenencia de uno de los responsables del grupo TADE al PROA del hospital (C-III).
- Se recomienda que la selección y forma de uso de los antimicrobianos en los programas TADE, se adapte a las directrices del PROA de referencia (C-III).
- Los TADE facilitan la optimización del uso de los antimicrobianos en situaciones empíricas en las que no es posible o deseable la utilización de la vía oral o en tratamientos dirigidos cuando no existen alternativas orales efectivas (B-II).
- Los TADE deben seguir los criterios utilizados en los PROA para la terapia secuencial (B-II).
- La duración total del tratamiento debe planificarse en base a las evidencias disponibles (A-I) y establecer medidas de evaluación y control para el cumplimiento de la misma (C-III).

## BIBLIOGRAFÍA

1. Rodríguez-Baño J, Paño-Pardo JR, Álvarez L, Asensio A, Calbo E, Cercenado E *et al*. Programas de optimización de uso de antimicrobianos (PROA) en hospitales españoles: documento de consenso GEIH-SEIMC, SEFH y SEMPSPH. *Enf Infecc Microbiol Clin* 2012; 30(1):22.e1-22.e23.
2. Society for Healthcare Epidemiology of America, Infectious Diseases Society of America, Pediatric Infectious Diseases Society. Policy statement on antimicrobial stewardship by the Society for Healthcare Epidemiology of America (SHEA), the Infectious Diseases Society of America (IDSA), and the Pediatric Infectious Diseases Society (PIDS). *Infect Control Hosp Epidemiol* 2012; 33: 322–7.
3. Barr DA, Semple L, Seaton RA. Outpatient parenteral antimicrobial therapy (OPAT) in a teaching hospital-based practice: a retrospective cohort study describing experience and evolution over 10 years. *Int J Antimicrob Agents* 2012; 39: 407–13
4. Gilchrist M, Seaton RA. Outpatient parenteral antimicrobial therapy and antimicrobial stewardship: challenges and checklists. *J Antimicrob Chemother* 2015; 70(4):965-70.

5. Tice AD, Rehm SJ, Dalovisio JR, Bradley JS, Martinelli LP, Graham DE *et al.* Practice Guidelines for Outpatient Parenteral Antimicrobial Therapy. *Clin Infect Dis* 2004; 38:1651–72.
6. Soriano A. Etiología, exploraciones y tratamiento empírico de los síndromes de causa infecciosa. En: J Mensa *et al.* Guía de Terapéutica Antimicrobiana. Editorial Antares. Barcelona, 2016.
7. Bennet, JE, Dolin R, Blaser M: Outpatient Parenteral Antimicrobial Therapy. En: Mandell, Douglas and Bennett's Principles and Practice of Infectious Diseases, Eight Edition. Vol. 1. Elsevier-Saunders. Philadelphia, 2014
8. Alfonso del Arco, Begoña Tortajada, Javier de la Torre, Julián Olalla, José Luís Prada, Natalia Montiel *et al.* Programa de asesoramiento en tratamiento antibiótico en un hospital de segundo nivel: resultados de un año de actuación. *Rev Esp Quimioter* 2011; 24(2):96-98.
9. Heintz BH, Halilovic J, Christensen CL. Impact of a multidisciplinary team review of potential outpatient parenteral antimicrobial therapy prior to discharge from an academic medical center. *Ann Pharmacother* 2011; 45(11):1329-37.
10. Pasquau J, Sadyrbaeva S, De Jesús SE, Hidalgo-Tenorio C. El papel de los programas de optimización de la antibioterapia (PROA) en el control de las resistencias bacterianas. *Rev Esp Quimioter* 2016; 29 Suppl 1:47-51
11. Hayashi Y, Paterson DL. Strategies for reduction in duration of antibiotic use in hospitalized patients. *Clin Infect Dis* 2011; 52(10):1232-40
12. Spellberg B. The New Antibiotic Mantra—"Shorter Is Better". *JAMA Intern Med* 2016; 176(9): 1254–1255
13. Pasquau J, Matesanz M. Duración del tratamiento antibiótico. *Rev Esp Quimioter* 2015; Suppl 1:30-3
14. Yong C, Fisher DA, Sklar GE, Li SC. A cost analysis of Outpatient Parenteral Antibiotic Therapy (OPAT): an Asian perspective. *Int J Antimicrob Agents* 2009; 33(1):46-51

## **CAPITULO 8. Evidencia de la eficacia y seguridad de TADE en síndromes infecciosos:**

### **8.A INFECCIÓN URINARIA**

**Autor: Miriam Delgado Vicente.** Hospital Universitario de Álava

#### **INTRODUCCIÓN**

Las infecciones del tracto urinario (ITU) constituyen una de las patologías infecciosas más frecuentes, presentando una mayor incidencia en mujeres con edades comprendidas entre los 18 y los 49 años, aumentando progresivamente a partir de los 50 años en ambos sexos<sup>1</sup>. Los estudios poblacionales ponen de manifiesto que la pielonefritis es más frecuente en la mujer joven, por lo general asociada a las relaciones sexuales, uso de contraceptivos y embarazo. En el hombre se presenta de forma más frecuente a partir de los 50 años, asociada en su mayor parte a uropatía obstructiva<sup>1,2</sup>. Los ingresos hospitalarios motivados por esta patología infecciosa son 4-5 veces más frecuentes en mujeres, aunque en los hombres la tasa de mortalidad intrahospitalaria es mayor<sup>3</sup>. Aunque la evolución clínica de la pielonefritis aguda suele ser favorable, en ocasiones pueden presentar complicaciones, pudiendo llegar a sepsis, lo que aumenta el riesgo de fallecimiento del paciente<sup>4</sup>.

La pielonefritis aguda no complicada sin intolerancia oral ni signos de deterioro clínico puede tratarse en régimen ambulatorio, sobre todo en el caso de mujeres sanas, no embarazadas, de mediana edad<sup>5,6</sup>. Son criterios de pielonefritis complicada y en ellas debe considerarse el ingreso hospitalario<sup>7</sup> los siguientes: sexo masculino (sobre todo en mayores de 75 años), la existencia de comorbilidad asociada como la diabetes mellitus, inmunodepresión, alteraciones funcionales y/o anatómicas del tracto urinario y fragilidad, entendida como el estado de susceptibilidad individual, que hace que tenga mayor probabilidad de presentar un resultado adverso cuando se encuentra en una situación de estrés (es decir pacientes con factores como: edad mayor de 80 años, pluripatología, problemas cognitivos, reingresos frecuentes, sin soporte social, patología crónica invalidante o pobreza). No hay evidencia disponible acerca de si la modalidad de tratamiento (en régimen hospitalario frente al domiciliario) implica diferencias pronósticas<sup>8</sup>. No obstante, la derivación de estos pacientes a unidades de Hospitalización a Domicilio (HaD) ha contribuido a la disminución de los ingresos hospitalarios, manteniendo indicadores de resultado adecuados (escasos reingresos y complicaciones)<sup>9,10</sup>. Las conclusiones del final del documento se han realizado utilizando la metodología de la calidad de la evidencia y el grado de recomendación. En la mayoría de los casos está limitada por tratarse de estudios prospectivos y con gran número de variables de confusión, no obstante, la información facilitada podría promover el desarrollo de más estudios.

La mayoría de los artículos publicados acerca del manejo de la ITU en HaD no son recientes y están basados en cohortes no extensas.<sup>11-13</sup>. A partir del año 2000 se han publicado varias series prospectivas y de mejor calidad metodológica. Ejemplos de ellos son los publicados por Goenaga *et al.*<sup>14</sup>, la guía de TADE de la Sociedad Americana de Enfermedades Infecciosas (IDSA) en 2004<sup>15</sup>, y otros trabajos como el de Mendoza *et al.*<sup>16</sup> en 2005, Regalado *et al* en 2006<sup>10</sup>, Horcajada JP *et al.*<sup>17</sup> en 2007 y Pérez López *et al.* en 2008<sup>18</sup>. Estudios recientes observacionales prospectivos y otros aleatorizados en poblaciones infantiles han demostrado también efectividad, seguridad y menor coste respecto a la hospitalización convencional<sup>19,20</sup>. En todos ellos se demuestra que la asistencia en régimen TADE en pacientes con ITU, es una alternativa eficaz que evita en numerosas situaciones el ingreso hospitalario. Disponemos de escasos trabajos que hayan analizado la eficacia y seguridad del TADE en pacientes derivados directamente desde los Servicios de Urgencias. El publicado por Mujal A *et al.*<sup>21</sup> puso de manifiesto que el TADE en esta situación concreta no se asoció a mayor riesgo de reingreso hospitalario ni peor evolución de la infección.

## DEFINICIONES BASICAS

1. ITU complicada: ITU (superior o inferior) asociada con una condición subyacente que incrementa el riesgo de fallo en el tratamiento. Incluye los siguientes: diabetes, embarazo, insuficiencia renal, síntomas de una semana o más de evolución, trastorno anatómico o funcional del tracto urinario (manipulación urológica reciente, sonda uretral permanente, obstrucción, litiasis, embarazo, reflujo vesicoureteral, vejiga neurógena, cicatrices renales)<sup>7</sup>. La mayoría de autores consideran las ITU que afectan al paciente varón como complicadas aunque no exista otro criterio de inclusión diferente al sexo<sup>22</sup>, en base a lo cual las prostatitis podrían también formar parte de este grupo.

2. TADE en la ITU: Una particularidad del TADE en ITU es que engloba fundamentalmente dos modalidades de manejo y tratamiento:

- a. Tratamientos previsiblemente de corta duración, por ejemplo el tratamiento de una ITU inferior complicada, en los que la HaD consistirían en la alternativa a un ingreso convencional en planta de hospitalización.
- b. Tratamientos más prolongados, como en el caso de prostatitis por microorganismos multirresistentes, adoptando una definición más clásica de TADE. En estos pacientes la hospitalización no sería necesaria para controlar la infección pero requiere tratamiento endovenoso.



Los pacientes con ITU atendidos en HaD pueden ser derivados desde los Servicios de Urgencias, Atención Primaria o desde la planta de hospitalización. La indicación de tratamiento antimicrobiano domiciliario endovenoso (TADE) en pacientes con ITU es la misma que de tratamiento antibiótico parenteral para el paciente hospitalizado. Al igual que en el resto de infecciones tratadas en el domicilio es imprescindible que la situación general y social del paciente permitan asegurar el cumplimiento del tratamiento y los cuidados a recibir sean equivalentes a los que recibiría en una unidad de hospitalización convencional<sup>23,24</sup>. En muchos casos los pacientes son derivados directamente desde Urgencias, sin hospitalización convencional inicial, por lo que el riesgo de empeoramiento brusco en la salud del paciente, desde su valoración inicial, debe ser bajo<sup>15</sup>.

### **Indicaciones de TADE en ITU:**

Aunque es imprescindible individualizar cada caso, las situaciones clínicas en las que el TADE es planteable como opción a la hospitalización convencional son las siguientes:

1. En la ITU inferior complicada, con afectación importante del estado general, infección previa en el mes previo, clínica con una duración superior a 1 semana, inmunodepresión, diabetes, insuficiencia renal y/o anomalía anatómica o funcional de la vía urinaria<sup>25,26</sup>.
2. En las primeras 24 horas en todo paciente con pielonefritis aguda<sup>7,25</sup>. Algunos expertos prefieren continuar el antibiótico parenteral hasta conocer la susceptibilidad del antibiograma, esta opción no está bien estudiada todavía, pero puede considerarse en función de la estabilidad y del juicio clínicos<sup>26</sup>.
3. En los casos en que se sospeche (o se confirme) que el microorganismo causante pueda ser multirresistente o presente resistencia a las opciones de tratamiento oral<sup>7,25,27</sup>.

Las situaciones clínicas descritas a continuación no serían candidatas a TADE:

1. Pacientes con ITU sin criterios de ingreso hospitalario como son cistitis aguda no complicada y pacientes con pielonefritis aguda no complicada (mujer premenopáusica no embarazada sin diabetes, inmunodepresión ni anomalías anatómicas o funcionales de la vía urinaria) con evolución clínica favorable tras recibir una o varias dosis de tratamiento antibiótico endovenoso en las primeras 4 a 6 horas iniciales tras el diagnóstico en un

servicio de Urgencias hospitalarias, en el que sea posible llevar a cabo un control estrecho por parte de su médico de Atención Primaria<sup>28,29</sup>.

2. Inestabilidad hemodinámica, sepsis grave o shock séptico.
3. Pacientes con pielonefritis enfisematosa, absceso renal corticomedular, absceso perinefrítico o necrosis papilar.

### **Recomendaciones específicas para el TADE en la ITU:**

Para llevar a cabo de forma adecuada el TADE en las ITU deben cumplirse una serie de premisas:

1. En el servicio de urgencias se administrará la primera dosis de antibiótico endovenoso una vez obtenido el urocultivo y/o hemocultivo. Optaremos por un antibiótico con elevada concentración en orina y buena difusión tisular<sup>30</sup> individualizando según la presentación clínica, exposición previa a otros antibióticos, resultados de cultivos previos y susceptibilidad local<sup>29</sup>
2. Se debe indicar realizar una ecografía urgente en caso de insuficiencia renal aguda, hematuria, dolor que no mejora con el tratamiento analgésico y persistencia de fiebre durante más de 72 horas tras el inicio del tratamiento. La tomografía axial computerizada con contraste es más sensible que la ecografía para abscesos de menos de 2 cm y para nefritis bacteriana aguda focal<sup>25</sup>
3. En la ITU del paciente con sondaje permanente se recomienda sustituirla sonda uretral. Algunos autores preconizan hacerlo incluso antes de iniciar el tratamiento antibiótico con el objetivo de disminuir el inóculo bacteriano y evitar el efecto del *biofilm* asociado a estos dispositivos<sup>31</sup>
4. Control telefónico y visitas programadas diarias por el equipo de Hospitalización a Domicilio durante al menos las primeras 48 horas de tratamiento en el domicilio. Posteriormente, es recomendable realizar una visita diaria del equipo de enfermería acompañada de un médico dependiendo del estado clínico del paciente.
5. Se utilizarán siempre medidas de hidratación, antitérmicos, analgésicos, así como alfa-bloqueantes si predomina la sintomatología obstructiva. Se vigilará la diuresis en las primeras 24 horas. En el caso de pacientes con prostatitis aguda que precisen sondaje, optar por una sonda uretral de diámetro, o en caso de no ser posible lo anterior, por un catéter suprapúbico<sup>29,31</sup>

## TRATAMIENTO ANTIBIOTICO

Se recomienda el tratamiento empírico intravenoso hasta disponer del antibiograma y/o defervescencia del paciente (usualmente en 48-72 horas)<sup>7,25,29</sup>. Dado que el tratamiento parenteral no suele ser prolongado, en general, es suficiente con disponer de un acceso venoso de tipo periférico<sup>15</sup>. En el caso de que la duración sea mayor de 1 semana, sería recomendable disponer de un acceso venoso de tipo "línea media"<sup>15,24</sup>.

Según las guías de práctica clínica de la Sociedad Americana de Enfermedades Infecciosas (IDSA) y la Sociedad Europea de Microbiología y Enfermedades Infecciosas (ESCMID), el tratamiento inicial de la pielonefritis aguda en mujeres con criterios de ingreso hospitalario debería realizarse utilizando fluoroquinolonas, un aminoglucósido con o sin ampicilina, cefalosporinas de amplio espectro o piperacilina-tazobactam con o sin aminoglucósido, o carbapenem.

El conocimiento de los patrones locales de resistencia contribuye al diseño de la terapéutica antimicrobiana empírica en la infección urinaria y por lo general se desaconseja la utilización de un antibiótico de forma empírica cuando su prevalencia de resistencia sobrepasa el 10%. En áreas donde la prevalencia de resistencia a fluoroquinolonas sea superior al 10% se recomienda emplear como tratamiento empírico 1 gramo de ceftriaxona o un aminoglucósido en una dosis diaria<sup>32</sup>

Los factores de riesgo para presentar una ITU por un microorganismo diferente a *E. coli* y/o multirresistentes [incluyendo a las enterobacterias productoras de betalactamasas de espectro extendido (BLEE)] y que deben ser valorados para seleccionar el tratamiento empírico son: edad avanzada, diabetes, hospitalización previa, ITU recurrente, portador de sonda permanente, manipulación urológica reciente, infección nosocomial, tratamiento antibiótico previo con quinolonas, cefalosporinas o amoxicilina/clavulánico, fracaso de tratamiento oral previo y antecedentes de infecciones urinarias en la infancia<sup>25,29</sup>

Los antibióticos más empleados en régimen de TADE son ceftriaxona, los aminoglucósidos y ertapenem (empleado en el 28,3% de los pacientes según la serie publicada por Pérez López *et al.*)<sup>15,18,24</sup>. Estos antibióticos son bien tolerados, con un adecuado espectro antimicrobiano para el tratamiento de ITU, y por su larga vida media, permiten utilizarlos en una infusión una vez al día. Los aminoglucósidos, requieren ser utilizados con cautela en ancianos, embarazadas y pacientes con insuficiencia renal, y/o hepática, recomendándose la monitorización semanal de los valores de creatinina sérica idealmente la determinación de niveles farmacocinéticos en algunos casos<sup>15</sup>.

El aumento de cepas de enterobacterias resistentes a los antibióticos más comúnmente empleados está reduciendo las opciones terapéuticas. El empleo de ertapenem en pacientes con ITU por enterobacterias productoras de BLEE en régimen TADE ha demostrado ser coste efectivo<sup>33</sup>. Meropenem no presenta suficiente estabilidad físico-química una vez reconstituido a temperatura ambiente para ser empleado en bombas electrónicas cargadas una vez al día. Su utilización en régimen de TADE mediante autoadministración por parte del paciente o sus cuidadores, o bien empleando bombas de infusión elastoméricas mantenidas refrigeradas hasta el momento de su utilización, han demostrando ser opciones eficaces y con seguridad similar a otras series donde es administrado por el equipo de HaD<sup>15,21</sup>

Piperacilina-tazobactam se considera un tratamiento antibiótico adecuado para el tratamiento de infecciones producidas por BLEE si son activos in vitro, siendo útiles como tratamiento definitivo<sup>34</sup>.

La combinación teicoplanina y tobramicina se recomienda para el tratamiento de ITU complicadas con sospecha de infección por microorganismos multiresistentes<sup>35</sup> o *Enterococcus faecium*.

Las opciones de tratamiento empírico en régimen TADE en pacientes con ITU se describen a continuación:

- ITU complicada, sin riesgo de microorganismo multirresistente (MR):  
ceftriaxona 1-2g/24h o gentamicina 4mg/kg/24h
- ITU complicada, con riesgo de MMRR:
  - a. Piperacilina-tazobactam 4-0,5g/8h/bomba IV
  - b. Tobramicina 3-5mg/kg/24h + teicoplanina 400mg/12h (tres primeras dosis y posteriormente administrado cada 24h)
  - c. Ertapenem 1g/24h cuando sea poco probable que los microorganismos causantes sean *P. aeruginosa* o *Enterococcus spp.* (sondaje permanente, nosocomial o uso de betalactámico los 3 meses previos).
  - d. Meropenem 1g/8h/autoadministrado (pacientes con filtrado glomerular < 50 mg/dl cada 12 h por el equipo de HaD).

## RECOMENDACIONES FINALES

- Las pautas de tratamiento antimicrobiano de las infecciones urinarias, así como su duración en régimen de TADE deben ser las mismas que para los pacientes en hospitalización convencional (C-III)

- La utilización de ertapenem en pacientes con ITU por enterobacterias productoras de BLEE en régimen de TADE ha demostrado ser una opción coste efectiva (B-III)

## BIBLIOGRAFÍA

1. Czaja CA, Scholes D, Hooton TM, Stamm WE. Population-based epidemiologic analysis of acute pyelonephritis. *Clin Infect Dis* 2007; 45: 273-280.
2. Scholes D, Hooton TM, Roberts PL, Gupta K, Stapleton AE, Stamm WE. Risk factors associated with acute pyelonephritis in healthy women. *Ann Intern Med* 2005; 142: 20-27.
3. Foxman, B, Klemstein KI, Brown PD. Acute pyelonephritis in US hospitals in 1997: hospitalization and in-hospital mortality. *Ann Epidemiol* 2003; 13: 144-150.
4. Efstathiou SP, Pefanis AV, Tsioulos DI, Zacharos ID, Tsiakou AG, Mitromaras AG, *et al.* Acute pyelonephritis in adults: prediction of mortality and failure of treatment. *Arch Intern Med* 2003; 163:1206-12.
5. Van Nieuwkoop C, Van't Wout JW, Spelt IC, Becker M, Kuijper EJ, Blom JW *et al.* Prospective cohort study of acute pyelonephritis in adults: safety of triage towards home based oral antimicrobial treatment. *J Infect* 2010; 60: 114-121.
6. Warren JW, Abrutyn E, Hebel JR, Johnson JR, Schaeffer AJ, Stamm WE. Guidelines for antimicrobial treatment of uncomplicated acute bacterial cystitis and acute pyelonephritis in women. Infectious Diseases Society of America (IDSA). *Clin Infect Dis* 1999; 29:745-58.
7. Nicolle LE, AMMI Canada Guidelines Committee. Complicate urinary tract infection in adults Can J Infect Dis. *Med Microbiol* 2005; 16(6):349-360.
8. Neumann I, Rojas MF, Moore P. Pyelonephritis (acute) in non-pregnant women. *Clinical Evidence* 2008; 02: 807.
9. Brown P, Ki M, Foxman B. Acute pyelonephritis among adults. Cost of illness and considerations for the economic evaluation of therapy. *Pharmacoeconomics* 2005; 23: 1-20.
10. Regalado J, Mendoza H, Aizpuru F, Altuna E, Gómez M, Cía J. Acute pyelonephritis treated in a hospital at Home Unit. Ten years'experience. *Enferm Infecc Microbiol Clin* 2006; 24:629-33.
11. Poretz DM, Eron JL, Goldenberg RI, Gilbert AF, Rising J, Sparks S, *et al.* Intravenous antibiotic therapy in an outpatient setting. *JAMA* 1982; 248:336-9.

12. Montalto M, Dunt D. Home and hospital intravenous therapy for two acute infections: an early study. *Aust New Zealand J Med* 1997; 27:19-23.
13. Chapman A, Dixon S, Andrews D, Lillie P, Bazaz R, Patchett J. Clinical efficacy and cost-effectiveness of outpatient parenteral antibiotic therapy (OPAT): a UK perspective. *Journal of Antimicrobial Chemotherapy* 2009; 64:1316-1324.
14. Goenaga MA, Sampedro I, Garde C, Millet M, Carrera JA. Tratamientos antibióticos parenterales y Unidades de Hospitalización a Domicilio: Situación actual. *Enferm Infec Microbiol Clin* 2000; 18:529.
15. Alan D, Rehm S, Dalovisio J, Bradley J, Martinelli L, Graham D, et al. Practice Guidelines for Outpatient Parenteral Antimicrobial Therapy. IDSA Guidelines. *Clin Infect Dis* 2004; 38:1651-72.
16. Mendoza-Ruiz de Zuazu H, Casas-Arrate J, Martinez-Martinez C, De la Maza I, Regalado de los Cobos J, Cía-Ruiz JM. Antibioterapia intravenosa en domicilio. Estudio de 515 casos. *Enf Inf Microbiol Clin* 2005; 23(7):396-401.
17. Horcajada JP, García L, Benito N, Cervera C, Sala M, Olivera A, et al. Hospitalización a domicilio especializada en enfermedades infecciosas. Experiencia de 1995 a 2002. *Enf Inf Microb Clin* 2007; 25:425-36.
18. Pérez López J, San José Laporte A, Alemán Manso C, Pardos-Gea J, Vilardell Tarrés M. Antibioterapia intravenosa domiciliaria en una unidad de hospitalización a domicilio: factores pronósticos de reingreso hospitalario. *Med Clin (Barc)* 2008; 131:290-2.
19. Peña, Anamaría, Zambrano, Alexsandra, Alvarado, Muriel, et al. Evaluación de la efectividad, seguridad y costes del tratamiento antimicrobiano de infusión ambulatoria (TAIA) vs hospitalizado en infección urinaria en pediatría. *Rev Chilena Infectol* 2013; 30(4):426-434,
20. Peña DA, Viviani ST, Le Corre PN, Morales MV, Montecinos BC, Gajardo SC. Treatment of urinary tract infections in febrile infants: experience of outpatient intravenous antibiotic treatment. *Rev Chilena Infectol* 2009; 26(4):350-4.
21. Mujal A, Solá J, Hernández M, Aragüas C, Machado ML, Oristrell J. Eficacia y seguridad del tratamiento antibiótico endovenoso en pacientes con patología infecciosa procedentes del servicio de urgencias. *Emergencias* 2013; 25:31-36.
22. Buonaiuto VA, Marquez I, De Toro I, Joya C, Ruiz-Mesa JD, Seara R et al. Clinical and epidemiological features and prognosis of complicated pyelonephritis: a prospective observational single hospital-based study. *BMC Infect Dis* 2014; 14: 639.
23. Nolet BR. Patient selection in outpatient parenteral antimicrobial therapy. *Infect Dis Clin North Am* 1998; 12:835-847.

24. Paladino JA, Poretz D. Outpatient Parenteral Antimicrobial Therapy Today. *Clin Infect Dis* 2010; 51(S2):S198-S208.
25. Mensa J, Gatell JM, García Sanchez JE, Letang E, López Suñé E, Marco F. Guía de terapéutica antimicrobiana 2013. Editorial Antares.
26. Talan DA, Krishnadasan A, Abrahamian FM, Stamm WE, Moran GJ and the EMERGEncy ID NET Study Group. Prevalence and risk factor analysis of trimethoprim-sulfamethoxazole and fluoroquinolone-resistant *Escherichia coli* infection among emergency department patients with pyelonephritis. *Clin Infect Dis* 2008; 47: 1150-1158.
27. Grabe M, Bjerklund-Johansen TE, Botto H, Cek M, Naber KG, Tenke P, Wagenlehner F. Guideline on urological infections. *European Association of Urology*. Update 2010.
28. Lluís M, Miró O, Perea M, Pedrol E, Mijana M, Rodellar T, Torrents A. Evolución de las pacientes con pielonefritis aguda no complicada tras su atención inicial y alta directa desde un servicio de urgencias hospitalario. *Emergencias* 2009; 21:325-332.
29. Pigrau C, Horcajada JP, Cartón JA, Pujol M, Mensa J. Infección urinaria. Protocolos SEIMC 2006. Sociedad Española de Enfermedades Infecciosas y Microbiología Clínica.
30. Jiménez S, Antolín A, Aguiló S, Sánchez M. Hospitalización a Domicilio directamente desde Urgencias. Una opción posible y eficiente. *Med Clin* 2010; 134(2):88-89.
31. Horcajada JP, Sorlí L, Montero M. Tratamiento de las infecciones no complicadas del tracto urinario inferior. Tratamiento de la pielonefritis aguda. Infección del Tracto Urinario 2011. Capítulo 5, págs: 57-72. Editorial Salvat.
32. Gupta K, Hooton T, Naber K, Wullt B, Colgan R, Miller L, *et al*. International Clinical Practice Guidelines for the Treatment of Acute Uncomplicated Cystitis and Pyelonephritis in Women: A 2010 Update by the Infectious Diseases Society of America and the European Society for Microbiology and Infectious Diseases. *Clin Infect Dis* 2011; 52 (5):e103-e120.
33. Bazaz R, Chapman AL, Winstanley TG. Ertapenem administered as OPAT for infections urinary tracts by BLEAS. *J Antimicrob Chemoter* 2010; 65(7):1510-3.
34. Rodríguez-Baño J, Navarro MD, Retamar P, Picón E, Pascual Á; Extended-Spectrum Beta-Lactamases–Red Española de Investigación en Patología Infecciosa/Grupo de Estudio de Infección Hospitalaria Group.  $\beta$ -Lactam/ $\beta$ -lactam inhibitor combinations for the treatment of bacteremia due to extended-

spectrum  $\beta$ -lactamase-producing *Escherichia coli*: a post hoc analysis of prospective cohorts. *Clin Infect Dis* 2012; 54(2):167-74.

35. Segado A, Regalado J, González VJ. Infecciones Urológicas. En: Mirón M, Estrada O, González VJ, coordinadores. Protocolos tratamiento antibiótico domiciliario endovenoso (TADE). 1ª edición. Elsevier Doyma; 2008. p. 193-210.

## 8.B INFECCION DE PIEL Y PARTES BLANDAS

**Autor:** Andima Basterretxea Ozamiz. Hospital Universitario Cruces, Baracaldo. (Vizcaya)

### INTRODUCCIÓN

Las infecciones de los tejidos superficiales son muy frecuentes, probablemente las más prevalentes en la práctica clínica diaria. Afectan a todas las edades y, en cuanto a su gravedad, puede oscilar desde la celulitis hasta la mionecrosis. Existen además situaciones especiales como las infecciones del pie diabético, las infecciones de herida quirúrgica, úlceras por presión, entre otras, que requieren un abordaje y tratamiento diferenciado<sup>1,2</sup>. El tratamiento antibiótico ha de ser empírico en la mayoría de las ocasiones por la dificultad en la obtención de muestras para cultivo. La terapia debe tener actividad frente a los gérmenes implicados con mayor frecuencia como *Streptococcus pyogenes* y *Staphylococcus aureus*.

Se han propuesto múltiples clasificaciones de las infecciones de la piel y los tejidos blandos (IPPB) atendiendo a diversos criterios. Una forma práctica de clasificación podría ser la que atiende a la severidad local (profundidad de la lesión y por la presencia o no de necrosis) y sistémica (existencia de signos y síntomas de la infección), así como, la presencia de comorbilidad<sup>3,4</sup>. No existe un criterio universalmente aceptado que ayude a los clínicos a decidir qué pacientes requieren ingreso hospitalario o bien, pueden continuar un tratamiento de forma ambulatoria. La decisión de ingreso hospitalario continúa basándose en la forma de presentación clínica, la experiencia del profesional y, muchas veces, únicamente en la necesidad de administración endovenosa de antimicrobianos, pese a no presentar factores de riesgo ni datos de gravedad. Se asume que las formas leves y moderadas pueden manejarse de forma ambulatoria<sup>5</sup>. Como proponen Verástegui *et al.*<sup>6</sup> muchos de estos pacientes con diagnóstico de celulitis pueden ser derivados directamente desde los Servicios de Urgencias para su seguimiento domiciliario tras un periodo de observación e inicio del tratamiento empírico. Se excluirían los pacientes con necesidad de desbridamiento de úlceras, sepsis grave o deterioro clínico. En el resto de



situaciones el ingreso hospitalario no aportaría más que un aumento innecesario de costes y un riesgo añadido de potenciales complicaciones, entre las que se encuentran las caídas, trombosis venosa, infección, flebitis por catéter, entre otros. La presencia de fiebre y recuento leucocitario mayor de 15.000 células se ha relacionado con una tasa mayor de fracasos del TADE y de retorno al hospital<sup>7,8</sup>. Sorprendentemente factores como la diabetes, el tabaquismo, la obesidad y la edad elevada no parecen relacionarse con una mayor tasa de reingresos<sup>9</sup>.

En el Reino Unido las IPPB suponen el 1,2% de los ingresos hospitalarios y aproximadamente la mitad de ellas requieren una pauta antimicrobiana intravenosa inicial<sup>10</sup>. Existen numerosas experiencias de tratamiento de formas moderadas y severas de IPPB mediante programas TADE como modelo alternativo al ingreso hospitalario, que pretende acortar o evitar estancias hospitalarias<sup>11-14</sup>. Está bien documentado el ahorro económico que supone en relación a la hospitalización convencional<sup>15,16</sup>.

Existe gran interés en determinar factores asociados a evolución clínica desfavorable en pacientes tratados por IPPB en régimen de TADE. Seaton *et al.*<sup>17</sup>, en un estudio que incluyó a 963 pacientes, constataron una tasa de evolución clínica desfavorable en el 2,8% de estos pacientes y un 6% requirieron reingreso hospitalario, pese a una cuidadosa selección inicial. Concluyeron que el sexo femenino, la diabetes mellitus y el tratamiento con teicoplanina fueron factores asociados, de forma independiente, al fracaso del TADE. La mediana de tratamiento fue de 3 días. En el mismo trabajo apreciaron que el aumento en la duración del tratamiento parenteral se relacionaba con: infección por SARM, edad avanzada, enfermedad vascular, diagnóstico de bursitis y el tratamiento con teicoplanina.

Con la puesta en marcha de programas de optimización y de uso racional de antimicrobianos, la utilización de pautas de tratamiento antibiótico por vía parenteral inicialmente, continuadas con pautas de administración por vía oral hasta el final de tratamiento empieza a ser habitual en la práctica clínica actual, facilitando el manejo extrahospitalario del paciente.

#### **Tratamiento antibiótico: recomendaciones específicas de tratamiento en TADE:**

Las pautas de tratamiento empleadas en TADE en el caso de IPPB son exactamente las mismas que las empleadas en régimen de hospitalización convencional. Al igual que en el resto de síndromes, las pautas de tratamiento empírico deben seleccionarse conforme a los patógenos más frecuentemente productores de cada uno de los tipos de infección y a la epidemiología local.

Es recomendable siempre que sea posible disponer de cultivos tomados mediante técnica adecuada para dirigir dicho tratamiento. Los antimicrobianos se seleccionarán en base a los criterios expuestos, considerando además su estabilidad a temperatura ambiente en aquellos que requieren más de una dosis diaria (ver capítulo 4).

## RECOMENDACIONES FINALES

- Las pautas de tratamiento antimicrobiano de las IPPB, así como su duración en régimen de TADE deben ser las mismas que para los pacientes en hospitalización convencional. (C-III)
- Es factible el tratamiento de formas moderadas y severas de las IPPB mediante programas TADE con criterios de seguridad, efectividad y eficiencia. (B-II)
- Numerosos pacientes con diagnóstico de celulitis pueden ser derivados directamente desde los Servicios de Urgencias para seguir TADE tras un periodo de observación e inicio de tratamiento antibiótico empírico. En estos pacientes, la presencia de fiebre y recuento leucocitario mayor de 15.000 células se relaciona con una mayor tasa de fracaso del TADE y por consiguiente con un mayor retorno al hospital. (B-III)
- Se recomienda un control clínico más estrecho de las IPPB en pacientes de sexo femenino, diabéticos y en TADE con teicoplanina ya que en algún estudio se han mostrado como factores independientes de fracaso del TADE. (B-III)

## BIBLIOGRAFIA

1. Guía de tratamiento de las infecciones de piel y tejidos blandos. *Rev Esp Quimioterap* 2006; 19:378-94.
2. Mensa J, Soriano A, Llinares P, Barberán J, Montejo M, Salavert M. Guía de tratamiento antimicrobiano de la infección por *Staphylococcus aureus*. *Rev Esp Quimioter* 2013; 26 (Supl. 1):
3. Eron, L. J. Infections of skin and soft tissue: outcomes of a classification scheme. *Clin Infect Dis* 2000; 31, 287 (A432).
4. Lawrence J. Eron. Managing skin and soft tissue infections: expert panel recommendations on key decision points. *J Antimicrob Chemother* 2003; 52 (Supl. S1): i3–i17.
5. Mual A, Solá J, Hernández M, Aragüas C, Machado ML, Oristrell J. Eficacia y seguridad del tratamiento antibiótico endovenoso en pacientes con

- patología infecciosa procedentes del servicio de urgencias. *Emergencias* 2013; 25:31-36.
6. Verastegui JE, Hamada Y, Nicolau DP. Transitions of care in the management of acute bacterial skin and skin structure infections: a paradigm shift. *Expert Rev Clin Pharmacol* 2016; 9(8):1039-45.
  7. Wiler JL, Ross MA, Ginde AA. National study of emergency department observation services. *Acad Emerg Med* 2011; 18:959-965.
  8. Schrock JW, Laskey S, Cydulka RK. Predicting observation unit treatment failures in patients with skin and soft tissue infections. *Int J Emerg Med* 2008; 1:85-90.
  9. Amin AN, Cerceo EA, Deitelzweig SB, *et al.* Hospitalist perspective on the treatment of skin and soft tissue infections. *Mayo Clin Proc* 2014; 89(10):1436-1451.
  10. NHS National Services Scotland. Incidence of hospital episodes by main diagnosis and financial year; and rates per 100,000 <http://www.isdscotland.org/Health-Topics/Hospital-Care/Diagnoses/> [accessed 8 June 2011].
  11. Mirón Rubio M, Estrada Cuxart O, González Ramallo VJ, eds. Tratamiento antimicrobiano domiciliario endovenoso. Madrid: Elsevier-Doyma; 2008,77-86.
  12. Tice AD, Rehm SJ, Dalovisio JR *et al.* Practice guidelines for outpatient parenteral antimicrobial therapy. *Clin Infect Dis* 2004; 38:1651-72.
  13. Paladino JA, Poretz D. Outpatient parenteral antimicrobial therapy today. *Clin Infect Dis* 2010; 51(Suppl 2):S198-S208.
  14. S. Shepperd, H. Doll, R.M. Angus, M.J. Clarke, S. Iliffe, L. Kalra *et al.* Hospital at home admission avoidance. *Cochrane Database Syst Rev* 2008; CD007491.
  15. Chapman ALN, Dixon S, Andrews D *et al.*, Clinical efficacy and cost effectiveness of outpatient parenteral antibiotic therapy (OPAT): a UK perspective. *J Antimicrob Chemother* 2009; 64: 1316.
  16. Gray A, Dryden M, Charos A. Antibiotic management and early discharge from hospital: an economic analysis. *J Antimicrob Chemother* 2012; 67: 2297-2302.
  17. R.A. Seaton, E. Sharp, V. Bezlyak, C.J. Weir. Factors associated with outcome and duration of therapy in outpatient parenteral antibiotic therapy (OPAT) patients with skin and soft-tissue infections. *Int J Antimicrob Agents* 2011; 38: 243-248.

## 8.C ENDOCARDITIS INFECCIOSA

**Autor: Víctor José González-Ramallo. Hospital General Universitario Gregorio Marañón. Madrid**

### INTRODUCCION

Pese a alguna comunicación aislada previa dentro de series generales, el tratamiento ambulatorio de la endocarditis infecciosa (EI) no empieza a desarrollarse hasta la última década del siglo XX. En este periodo, algunos equipos en países como Argentina<sup>1</sup> o Estados Unidos<sup>2</sup> comienzan a completar los tratamientos antibióticos intravenosos de las EI de forma ambulatoria. Estas primeras experiencias se centraban en el tratamiento de EI estreptocócicas dada su menor agresividad y su sencillo tratamiento con ceftriaxona<sup>3</sup>, pero incluían también pacientes con EI de otras etiologías<sup>4</sup>.

En 2001 una revisión de Margaret Andrews y Fordham von Reyn, publicada a raíz del fallecimiento en Estados Unidos de dos pacientes con EI tratados ambulatoriamente, alertaba del riesgo de esta práctica<sup>5</sup>. Los autores recomendaban limitar el tratamiento ambulatorio a los pacientes con baja probabilidad de desarrollar complicaciones. Como norma general, el traslado fuera del hospital no se debía iniciar hasta finalizadas al menos dos semanas de tratamiento antimicrobiano eficaz. Una vez superada esta fase crítica, se podía completar el tratamiento de forma ambulatoria en los pacientes que no estuvieran incluidos en alguno de los siguientes grupos de riesgo:

- Endocarditis protésica
- Endocarditis aórtica
- Microorganismos agresivos, (*Staphylococcus aureus*, *Streptococcus pneumoniae* o del grupo B, bacterias gramnegativas, hongos).
- Complicaciones cardíacas (insuficiencia cardíaca, abscesos paravalvulares, bloqueos de la conducción) o extracardíacas (embolismos sépticos).

Dada la tendencia en los países desarrollados a un incremento en el porcentaje de EI estafilocócicas, protésicas y relacionadas con los cuidados sanitarios, el estricto cumplimiento de los criterios de exclusión de Andrews y von Rein, dejaba fuera de la posibilidad de tratamiento ambulatorio a la mayoría de los pacientes con EI.

Frente a este manejo conservador, se han ido sucediendo durante los últimos quince años, trabajos de diversos grupos especializados que incluyen en sus series pacientes con EI pertenecientes a los grupos de riesgo<sup>6-12</sup>. A ello ha contribuido la comercialización de nuevos antimicrobianos frente a Gram

positivos que por su farmacocinética y menor toxicidad facilitan la ambulatorización del tratamiento intravenoso<sup>13-14</sup>. En las últimas ediciones de las guías de endocarditis británicas<sup>15</sup>, americanas<sup>16</sup> y europeas<sup>17</sup>, ya no se preconiza esta restricción del tratamiento ambulatorio a los pacientes de bajo riesgo, si bien se sigue advirtiendo de la mala evolución de las EI estafilocócicas recomendándose un estrecho control.

No existen ensayos clínicos controlados comparativos de la administración ambulatoria de antibióticos i.v. con el tratamiento hospitalario convencional para la EI, pero sí se han publicado series descriptivas bastante amplias y un ensayo clínico no comparativo<sup>3</sup>. La serie más numerosa es la publicada en 2009 por un grupo neozelandés que trataron a 149 pacientes durante un periodo de ocho años<sup>10</sup>, incluyendo pacientes con elevada comorbilidad y con EI de riesgo (estafilocócicas, protésicas). Sólo se presentaron tres complicaciones serias que probablemente también hubiesen ocurrido en el hospital. Este grupo recurrió con frecuencia a la administración de antibióticos mediante bombas de infusión. También es de destacar la serie del Hospital Clínic de Barcelona<sup>8</sup> que recoge 73 episodios tratados a lo largo de diez años. En este caso se excluyeron las EI protésicas precoces, aquellas por microorganismos difíciles de erradicar o con extensión cardíaca o extracardíaca. En esta serie fue necesario el reingreso de doce pacientes (16%) de los cuales tres fallecieron (4%).

Por último, la serie del Hospital Marqués de Valdecilla<sup>12</sup> aporta la interesante novedad de contemplar la posibilidad de contar con la colaboración del paciente y/o su cuidador para la administración del tratamiento intravenoso. Es este un aspecto importante en el caso de la endocarditis, infección en la que con frecuencia hay que recurrir a la asociación de antimicrobianos varios de los cuales precisan varias dosis diarias. Hay que señalar que esta colaboración, no exime al personal sanitario de la realización de las visitas diarias domiciliarias de control clínico y analítico y de supervisión del tratamiento.

En los últimos años se ha generado gran interés por intentar identificar los factores pronósticos del reingreso en hospitalización convencional de las EI tratadas ambulatoriamente. Un estudio retrospectivo escocés que revisa 80 episodios de EI tratadas ambulatoriamente<sup>18,19</sup> y en el que se registra un porcentaje más elevado de “fracasos” (31,3%) determina que la presencia de insuficiencias cardíaca o renal y el uso de teicoplanina son las variables que se correlacionan de forma independiente con ello.

## **Recomendaciones generales**

El tratamiento ambulatorio de la EI es uno de los mayores retos a los que se puede enfrentar un equipo de TADE. La elevada mortalidad pese a tratamiento correcto y la frecuencia, gravedad y evolución fulminante de sus complicaciones

hacen que sólo unidades de HAD con amplia experiencia y estrecha relación con los servicios hospitalarios implicados (Cirugía Cardíaca, Cardiología, Enfermedades Infecciosas) deban ofertar en su cartera de servicios el tratamiento y seguimiento de las EI.

Estimamos imprescindible asegurar unas premisas para garantizar en lo posible un seguimiento óptimo:

- No trasladar al domicilio durante la fase crítica (primera dos semanas de tratamiento), a excepción de EI por *Streptococcus* del grupo *viridans* sobre válvula natural no complicada en la que se puede adelantar el traslado a los 7 o 10 días<sup>5,16,17</sup>.
- Extremar la vigilancia en las EI por *Staphylococcus aureus*<sup>15</sup> y otros microorganismos agresivos.
- Valoración previa por Cirugía Cardíaca.
- Estabilidad hemodinámica
- Resolución completa de la fiebre.
- Negativización de los hemocultivos.
- Realización los estudios de imagen pertinentes para descartar embolismos periféricos.
- Visita programada al menos diaria por enfermería entrenada<sup>15,16,17</sup>.
- Visita programada al menos dos veces por semana del médico especialista responsable<sup>17</sup>.
- Control telefónico diario por el médico responsable<sup>15</sup>.
- Coordinación estrecha con los servicios de Microbiología, Cardiología y Cirugía Cardíaca con posibilidad de contacto inmediato<sup>16</sup>.
- Explicación detallada al paciente y sus familiares de la naturaleza de la enfermedad y de sus posibles complicaciones<sup>17</sup>.

A la vista de las anteriores necesidades de estrecho control por especialistas, las unidades de HAD entrenadas en el manejo de la EI son el dispositivo asistencial de preferencia para el tratamiento ambulatorio de esta grave enfermedad infecciosa.

## TRATAMIENTO ANTIBIÓTICO

El tratamiento antimicrobiano de la EI suele ser prolongado, con dosis elevadas y frecuentemente con asociaciones de fármacos. Por ello es habitual que nos veamos obligados a asegurar un acceso venoso estable mediante un catéter venoso central de inserción periférica y a recurrir a bombas de infusión electrónica o dispositivos elastoméricos. Todo ello puede tentarnos a intentar pautas más sencillas sin suficiente evidencia científica. En general, dada la

gravedad de la infección, no debemos utilizar antimicrobianos que no hayan demostrado su eficacia y seguridad en esta indicación<sup>15</sup>.

Las pautas de tratamiento empírico en los casos en los que no ha sido posible establecer el diagnóstico etiológico y las específicas para cada microorganismo no deben variar sustancialmente de las iniciadas en el hospital con algunas peculiaridades:

- El por *Streptococcus* del grupo *viridans*: la opción más cómoda es la utilización de ceftriaxona que, además, ha demostrado su eficacia en un ensayo clínico<sup>3</sup>.
- El por *Staphylococcus* sensibles a meticilina: se intentará mantener el tratamiento estándar con cloxacilina a altas dosis lo que requiere de una vía venosa de grueso calibre y de la utilización de una bomba electrónica de infusión o de dispositivos elastoméricos refrigerados con recambios con la colaboración del paciente/cuidador. La solución de cloxacilina, aparte de su alta osmolaridad, aporta una elevada cantidad de sodio que pueden desencadenar cuadros de insuficiencia cardíaca. Para minimizar ambos problemas puede sustituirse por cefazolina. En caso de no ser viable esta alternativa (ausencia de vía venosa adecuada, alergia a betalactámicos) puede utilizarse daptomicina<sup>15</sup> a dosis altas (10 mg/kg/d).
- El por SARM: es una situación poco frecuente en TADE. Puede mantenerse el tratamiento con vancomicina precisando bomba de infusión y vigilancia de niveles séricos o bien sustituirse por daptomicina a dosis altas<sup>15</sup> que se administra una vez al día. Se desaconseja el uso de teicoplanina dadas las experiencias adversas comunicadas.
- El por *Enterococcus*: En los casos de El por *Enterococcus faecalis*, se han reportado casos tratados en TADE con ampicilina a dosis altas mediante bomba de infusión (aunque su estabilidad a temperatura ambiente puede ser inferior a 24 horas) y ceftriaxona (2-4 g/d) y la experiencia en tratamiento ambulatorio es limitada<sup>20</sup>.

## RECOMENDACIONES FINALES

- Los pacientes con EI a los que se le proponga TADE se les deberá haber completado un estudio y estabilizado en hospitalización convencional previamente a ello. (C-I)
- Deberán tener una baja probabilidad de complicaciones, las más frecuentes de las cuales son el desarrollo de insuficiencia cardíaca y de embolismos sistémicos. (C-I)
- Para ello deberán haber cumplido al menos dos semanas de tratamiento correcto en hospitalización convencional (7-10 días en

el caso de *Streptococcus* del grupo *viridans*), con estabilidad clínica y hemodinámica y con hemocultivos de control negativos. (B-II)

- Para otras formas de endocarditis diferentes a la anterior, la decisión de incluir al paciente para un programa de TADE deberá ser siempre consensuada con el equipo médico-quirúrgico del paciente. (C-III)
- La duración del tratamiento antibiótico en régimen de TADE será la misma que se aconseja para el paciente hospitalizado. (B-II)
- Para el tratamiento de la endocarditis por *Streptococcus* del grupo *viridans* en TADE se aconseja ceftriaxona. (A-I)
- Para la endocarditis por *S. aureus* meticilin sensible, se aconseja siempre que sea posible cloxacilina. (C-III)
- 8.C.8 Los pacientes con EI por *S. aureus* meticilin resistente, así como las producidas por *Enterococcus* es difícil que puedan cumplir criterios de TADE. En estos casos, su inclusión en el programa de TADE dependerá de la experiencia del equipo y siempre será consensuada. (C-III)

## BIBLIOGRAFÍA

1. Stamboulia D. Outpatient treatment of endocarditis in a clinic-based program in Argentina. *Eur J Clin Microbiol Infect Dis* 1995; 14:648-54.
2. Tice AD. Experience with a physician-directed, clinic-based program for outpatient parenteral antibiotic therapy in the USA. *Eur J Clin Microbiol Infect Dis* 1995; 14: 655-661.
3. Francioli P, Ruch W, Stamboulia D. Treatment of streptococcal endocarditis with a single daily dose of ceftriaxone and netilmicin for 14 days: a prospective multicenter study. *Clin Infect Dis* 1995; 21:1406-10.
4. Lopardo G. Management of endocarditis: outpatient parenteral antibiotic treatment in Argentina. *Chemotherapy* 2001; 47 (suppl 1):24-32.
5. Andrews MM, von Reyn CF. Patient selection criteria and management guidelines for outpatient parenteral antibiotic therapy for native valve infective endocarditis. *Clin Infect Dis* 2001; 33: 203-209.
6. Larioza J, Heung L, Girard A, Brown RB. Management of infective endocarditis in outpatients: Clinical experience with Outpatient Parenteral Antibiotic Therapy. *South Med J* 2009; 102:575-9.
7. Amodeo MR, Clulow T, Lainchbury J, Murdoch DR, Gallagher K, Dyer A, *et al.* Outpatient intravenous treatment for infective endocarditis: safety, effectiveness and one-year outcomes. *J Infect* 2009; 59:387-93.



8. Cervera C, del Río A, García L, Sala M, Almela M, Moreno A, *et al.* Efficacy and safety of outpatient parenteral antibiotic therapy for infective endocarditis: a ten-year prospective study. *Enferm Infecc Microbiol Clin* 2011; 29:587–592.
9. Partridge DG, O'Brien E, Chapman AL. Outpatient parenteral antibiotic therapy for infective endocarditis: a review of 4 years' experience at a UK centre. *Postgrad Med J* 2012; 88:377-81.
10. Goenaga MA, Kortajarena X, Ibarguren O, García R, Bustinduy MJ, Azkune H; GAMEGI Group. Outpatient parenteral antimicrobial therapy (OPAT) for infectious endocarditis in Spain. *Int J Antimicrob Agent* 2014; 44: 89-90.
11. Lacroix A, Revest M, Patrat-Delon S, Lemaître F, Donal E, Lorréac'h A, Arvieux C, Michelet C, Tattevin P. Outpatient parenteral antimicrobial therapy for infective endocarditis: a cost-effective strategy. *Med Mal Infect* 2014; 44:327-30.
12. Pajarón M, Fernández-Miera MF, Allende I, Arnaiz AM, Gutiérrez-Cuadra M, Cobo-Belaustegui M, Armiñanzas C, de Berrazueta JR, Fariñas MC, Sanroma P; Hospital Valdecilla Endocarditis Study Group. Self-administered outpatient parenteral antimicrobial therapy (S-OPAT) for infective endocarditis: a safe and effective model. *Eur J Intern Med* 2015; 26:131-6.
13. Rehm S, Champion M, Katz DE *et al.* Community-based outpatient parenteral antimicrobial therapy (CoPAT) for *Staphylococcus aureus* bacteraemia with or without infective endocarditis: analysis of the randomized trial comparing daptomycin with standard therapy. *J Antimicrob Chemother* 2009; 63: 1034–42.
14. Dohmen PM, Guleri A, Capone A, Utili R, Seaton RA, González-Ramallo VJ, *et al.* Daptomycin for the treatment of infective endocarditis: results from a European registry. *J Antimicrob Chemother* 2013; 68: 936–942.
15. Gould FK, Denning DW, Elliott TSJ, Foweraker J, Perry JD, Prendergast BD, *et al.* Guidelines for the diagnosis and antibiotic treatment of endocarditis in adults: a report of the Working Party of the British Society for Antimicrobial Chemotherapy. *J Antimicrob Chemother* 2012; 67:269-89.
16. Baddour LM, Wilson WR, Bayer AS, Fowler, VG Jr, Tleyjeh IM, Rybak MJ, *et al.* on behalf of the American Heart Association Committee on Rheumatic Fever, Endocarditis, and Kawasaki Disease of the Council on Cardiovascular Disease in the Young, Council on Clinical Cardiology. Infective Endocarditis in Adults: Diagnosis, Antimicrobial Therapy, and Management of Complications. A Scientific Statement for Healthcare Professionals from the American Heart Association. *Circulation* 2015; 132: 1435-86.
17. Habib G, Lancellotti P, Antunes MJ, Bongiorni MG, Casalta JP, Del Zotti F, *et al.* 2015 ESC Guidelines for the management of infective endocarditis: The Task

Force for the Management of Infective Endocarditis of the European Society of Cardiology (ESC). *Eur Heart J* 2015; 36: 3075-128.

18. Duncan CJ, Barr DA, Ho A, Sharp E, Semple L, Seaton RA. Risk factors for failure of outpatient parenteral antibiotic therapy (OPAT) in infective endocarditis. *J Antimicrob Chemother* 2013; 68:1650-4.

19. Duncan CJ, Barr DA, Seaton A. OPAT outcomes in endocarditis. *BMJ* 2013; 346:f2484.

## 8.D. INFECCIÓN RESPIRATORIA Y NEUMONÍA

**Autor: Miguel Ángel Ponce González.** Hospital Universitario de Gran Canaria Dr. Negrín.

### INTRODUCCION:

El tratamiento antibiótico domiciliario endovenoso (TADE) realizado en una Unidad de Hospitalización a Domicilio puede ser una alternativa al ingreso hospitalario en los pacientes con exacerbación de una enfermedad respiratoria crónica como consecuencia de una infección respiratoria. El EPOC agudizado y la neumonía de la comunidad son de las causas infecciosas más frecuentes de ingreso hospitalario por lo que la posibilidad de manejar a estos pacientes en domicilio con las suficientes garantías de eficacia y seguridad tiene una gran importancia. El ahorro de costes y la evitación de complicaciones nosocomiales cuyo riesgo aumenta con los días de hospitalización incrementan la morbimortalidad, la estancia hospitalaria y, por ende, el gasto. Según la literatura existente un tratamiento completo de TADE cuesta al día aproximadamente una quinta parte de lo que costaría el mismo tratamiento en el hospital (200 frente a 1.000 dólares)<sup>1</sup>. A todo ello se une que el progresivo conocimiento de la seguridad de estos procedimientos ha sido posible gracias al análisis de los casos realizados en diferentes registros, y entre ellos destacan el OPAT International Registry, que a fecha de diciembre de 2003 había analizado pormenorizadamente más de 13.000 casos<sup>2</sup>. También y desde 1997 se han publicado, de la mano de la IDSA (*Infectious Diseases Society of America*), guías de actuación cuya última revisión de junio de 2004 que orientan y ayudan a desarrollar programas de TADE<sup>3</sup>. Actualmente no se discuten ni la seguridad ni la efectividad del TADE. En países como Estados Unidos, donde el coste sanitario repercute sobre los pacientes y las compañías aseguradoras, esta modalidad ha tenido un auge importante. Durante el año 2000 más de 250.000 enfermos recibieron antibióticos por vía parenteral en régimen ambulatorio.

Otro factor importante ha sido el desarrollo de nuevas tecnologías y materiales que han permitido el desarrollo de bombas de infusión realmente portátiles o de accesos vasculares con cánulas menos flebógenas y más duraderas. Las bombas de infusión pequeñas y fiables, ya sean electrónicas o elastoméricas, facilitan los tratamientos que requieren de dosis múltiples al día o de infusión continua, ampliando las posibilidades terapéuticas antibióticas parenterales en domicilio.

Entre las principales indicaciones de TADE en infecciones respiratorias destacan: exacerbación infecciosa de bronconeumopatías crónicas, neumonía bacteriana (comunitaria y nosocomial), bronquiectasias sobreinfectadas, fibrosis quística y absceso pulmonar. No obstante debemos comentar que a pesar de la importancia de la patología infecciosa respiratoria como causa de ingresos hospitalarios, la experiencia en TADE no es tan amplia como con otras patologías infecciosas tales como: osteomielitis, infecciones de tejidos blandos, etc. existiendo en algunos países desde hace varios años programas bien establecidos y diseñados de TADE para estas patologías infecciosas no respiratorias. Existe muy escasa literatura científica sobre efectividad y seguridad del TADE en patología infecciosa respiratoria.

## **TADE en EPOC AGUDIZADO**

La exacerbación en el paciente EPOC se define como un cambio agudo en la situación basal clínica del paciente que suele cursar con aumento de la disnea, de la expectoración y cambio de aspecto de dicha expectoración. Entre un 50 y un 75% de las exacerbaciones de la EPOC son de causa infecciosa. En algo más de la mitad de éstas el agente etiológico es bacteriano, principalmente *Haemophilus influenzae*, *Streptococcus pneumoniae* o *Moraxella catarrhalis*. En los enfermos más graves, *Pseudomonas aeruginosa* adquiere un mayor protagonismo ya que cuanto mayor es la gravedad de la EPOC, mayor es la posibilidad de que sea el agente causal. Esta bacteria es una de los microorganismos más importantes y problemáticos de las bacteriemias provocadas por gérmenes gramnegativos. Suele presentarse con frecuencia en pacientes inmunodeprimidos, con periodos largos de hospitalización, con antecedentes de infecciones graves y con un uso previo de antibióticos de amplio espectro o esteroides orales por agudizaciones previas. Por tanto según la guía de consenso GESEPOC<sup>4</sup>, los pacientes con EPOC con más de 4 ciclos de tratamiento antibiótico en el último año y uso de esteroides orales, función pulmonar con un FEV1 <50% predicho (EPOC GOLD III y IV), presencia significativa de bronquiectasias, y aislamiento de *Pseudomonas* en esputo de fase estable o en una exacerbación previa, se recomiendan generalmente antibióticos parenterales para cubrir adecuadamente este germen que suele ser resistente a los antibióticos orales. La mortalidad por este microorganismo es elevada, llegando al 40%, fundamentalmente en las primeras 48 horas del inicio

y sobretodo en relación con el foco pulmonar y con un tratamiento antimicrobiano inadecuado (> 4 ciclos de tratamiento antibiótico en el último año). Las infecciones por *P. aeruginosa* en los EPOC así como en los pacientes con bronquiectasias implican ingresos prolongados para uso de terapia antibiótica endovenosa dadas las pobres posibilidades de tratamiento oral contra esta bacteria y sus elevadas resistencias. De esta forma estos ingresos pueden ser evitados y optimizados bajo la modalidad de Hospitalización a Domicilio y administración domiciliaria de los mismos.

Como hemos comentado existe escasa literatura científica de manejo de TADE en patología infecciosa respiratoria incluyendo el EPOC agudizado. *Montona et al.*<sup>5</sup> publicaron un estudio de TADE en pacientes respiratorios crónicos donde casi la mitad (47%) eran EPOC agudizados y confirmaron que el TADE autoadministrado y controlado mediante el ingreso en una Unidad de Hospitalización a Domicilio es un sistema seguro y eficaz para el manejo de las infecciones respiratorias en los pacientes con enfermedad respiratoria crónica, pudiendo ser los pacientes directamente derivados desde el Hospital de Día de Enfermedades Respiratorias a la Unidad de Hospitalización a Domicilio, lo cual permite evitar tanto las asistencias a los servicios de urgencias como los ingresos hospitalarios convencionales. Otro estudio a destacar es el de *Garde et al.*<sup>6</sup> sobre 87 pacientes con infección respiratoria por *P. aeruginosa* entre los cuales está el EPOC agudizado de la unidad de Hospitalización a Domicilio del Hospital de Donostia (San Sebastián) donde observaron igualmente que el TADE es útil especialmente en el tratamiento de esta infección respiratoria para reducir estancias medias hospitalarias dada la duración habitual del tratamiento de esta bacteria que se recomienda entre 10-14 días. Uno de los estudios más recientes publicados en nuestro país sobre pacientes con EPOC agudizado ingresados en una unidad de Hospitalización a Domicilio es el de *Díaz Lobato et al.* en 2005<sup>7</sup>. Ochenta pacientes ingresados en planta de Neumología y que cumplían criterios de estabilidad clínica y gasométrica, fueron aleatorizados al tercer día de ingreso a continuar en régimen de hospitalización convencional o a TADE. Los resultados demostraron que una unidad de Hospitalización a Domicilio formada por Neumólogos y personal de enfermería entrenado en enfermedades respiratorias, permite la recuperación del paciente sin un aumento de la tasa de reingresos, recaídas o fracasos terapéuticos.

El propio consenso nacional de la EPOC (GESEPOC)<sup>4</sup> considera que las unidades de HaD son una alternativa de asistencia para pacientes con agudizaciones infecciosas de EPOC que no sufren de acidosis respiratoria. *Ram et al.*<sup>8</sup> realizaron un metaanálisis confirmando que las unidades de hospitalización alternativas son seguras en comparación con la hospitalización convencional, teniendo en cuenta que los pacientes con trastornos mentales, cambios radiológicos o electrocardiográficos, comorbilidades significativas y bajo apoyo social no deben ser incluidas en estos programas. Otro metaanálisis publicado

por *Jeppensen et al.*<sup>9</sup> confirma la efectividad y seguridad de las unidades de Hospitalización a Domicilio en pacientes con EPOC agudizado. A pesar de estos metaanálisis, la literatura existente demuestra que la HAD y la TADE aún no es lo suficientemente común en el EPOC agudizado de causa infecciosa así como para otras infecciones respiratorias, junto con el bajo número de neumólogos que participan activamente en las HAD.

En la actualidad y dada la escasa literatura existente de TADE en EPOC agudizado, nuestro grupo de trabajo de TADE de la SEHAD está pendiente de publicar un trabajo multicéntrico en nuestro país en 562 episodios de EPOC agudizado estadio III y IV GOLD demostrando la efectividad y seguridad de TADE en estos pacientes. Hemos observado que el TADE en pacientes con EPOC agudizado con criterios de antibioticoterapia parenteral es efectivo y seguro, absteniéndose una curación o mejoría muestra mejoría en el 92,2% de los casos. Nuestro estudio demuestra que la necesidad de terapia intravenosa no siempre debe ser un criterio de admisión en planta de hospitalización para el EPOC agudizado aunque precise de antibioticoterapia parenteral. Consideramos que la evitación de un ambiente nosocomial en estos pacientes manejados en unidades de HAD puede ser beneficioso en términos de menos complicaciones. De esta manera los pacientes con EPOC agudizado y necesidad de TADE se pueden evitar o reducir las estancias hospitalarias sin aumentar los reingresos hospitalarios y las complicaciones. Sin embargo, se requieren más estudios para confirmar estos datos.

## **TADE en NEUMONIA**

**A) Neumonía de la comunidad:** En cuanto a los criterios de inclusión para el manejo de la neumonía de la comunidad (NAC) en domicilio mediante TADE podrían ser aquellos pacientes con PSI (*Pneumonia Severity Index*) tipo PSI III que pueden ser derivados desde el propio servicio de urgencias o bien pacientes con PSI IV o V tras estabilización en planta convencional o bien la escala de Fine I y II con comorbilidad. La gran mayoría de las publicaciones se basan en la continuidad de los tratamientos antibióticos que han comenzado en el hospital una vez alcanzada la estabilidad clínica del paciente, no considerando la TADE como una alternativa desde el inicio del tratamiento en esta patología infecciosa respiratoria. Sin embargo, existe un estudio publicado en pacientes con NAC en estadio de PSIII donde se plantea la posibilidad de tratar desde el inicio en su domicilio tras 24 horas de observación inicial en Urgencias<sup>10</sup>.

La guía TADE de la Sociedad Española de Medicina Interna publicada en 2008 coordinada por *Miron M, et al.*<sup>11</sup> recomienda el manejo de la NAC en HaD según el siguiente algoritmo de actuación (Figura 2)

Entre los estudios a destacar sobre NAC manejada en domicilio con TADE debemos destacar el de *Richards et al.*<sup>12</sup> realizado sobre una muestra de 55 pacientes con NAC Fine III y IV en Nueva Zelanda. En dicho estudio se obtuvo resultados equiparables respecto a seguridad en pacientes ingresados en planta convencional frente al domicilio, complicaciones, días de TADE y satisfacción de los pacientes.

Otro de los pocos estudios que debemos mencionar en este caso en nuestro país es el de *Regalado de los Cobos et al.*<sup>13</sup> donde se revisaron los casos de neumonía adquirida en la comunidad remitidos de urgencias a HAD con mayoritariamente Levofloxacino y Ceftriaxona IV. La eficacia de HaD en el tratamiento de neumonía adquirida en la comunidad fue menor en los pacientes con mayor gravedad definida por medio de diferentes escalas de predicción clínica (PSI y CURB 65), pero fue eficaz en un 92,3 % porcentaje de casos en los que está indicado el ingreso hospitalario. Sin embargo, no se estudiaron parámetros de seguridad de TADE.

También debemos destacar otro estudio publicado de nuestro grupo de trabajo de eficacia y seguridad de la TADE en infecciones respiratorias en general donde se incluyeron pacientes con neumonía comunitaria e incluso nosocomial, además de bronquiectasias y fibrosis quística siendo derivados desde el hospital de día respiratorio. Los resultados de dicho estudio confirmaron que el TADE administrado y controlado mediante el ingreso en HAD fue un procedimiento seguro y eficaz, pudiendo realizarse mediante derivación desde el hospital de día y por lo tanto evitando ingresos en hospitalización convencional<sup>14</sup>.

## **B) Neumonía nosocomial:**

Las infecciones nosocomiales también pueden ser tributarias de ser atendidas en el marco de un programa de TADE. No hay trabajos de suficiente calidad metodológica que permitan estratificar o reconocer de forma fehaciente los factores asociados a un pronóstico favorable. En general, al igual que en otras infecciones graves con elevado riesgo de morbimortalidad, se puede contemplar el tratamiento parenteral en régimen domiciliario, una vez confirmada la buena evolución clínica en respuesta al fármaco administrado y si no hay otras complicaciones que puedan ser causa de inestabilidad clínica.

La guía de TADE de la Sociedad Española de Medicina Interna también propone un algoritmo de decisión para pacientes con neumonía nosocomial con evolución favorable tras su estancia en planta de hospitalización convencional, para ser seguidos en hospitalización a domicilio (figura 3).

## TADE en FIBROSIS QUISTICA

La fibrosis quística (FQ) es la enfermedad genética letal más frecuente en la población caucasiana y es, probablemente, la enfermedad crónica cuya supervivencia se ha incrementado más llamativamente en los últimos 25 años gracias a las mejoras en el tratamiento antibiótico. En los pacientes afectados de FQ se incrementan las exacerbaciones y los ingresos a partir de la segunda década de la vida, de tal forma que el paciente y la familia se van familiarizando con muchos efectos del tratamiento y no existen razones por las que no pueda llevarse a cabo en el propio domicilio del enfermo. De hecho, podemos afirmar que donde existe más experiencia en TADE en patología respiratoria crónica es en esta patología.

Existe una revisión Cochrane sobre el TADE en la fibrosis quística publicada en el año 2008 donde se incluyeron ensayos controlados aleatorios en los que se comparaba el tratamiento a domicilio con antibióticos intravenosos frente al tratamiento con antibióticos intravenosos administrado en el hospital en pacientes con dicha patología<sup>15</sup>. Los estudios incluían adultos y niños y se incluyeron todos los tipos de antibióticos y regímenes administrados por vía intravenosa. Las alteraciones personales, familiares y en los patrones de sueño y alimentación fueron menos importantes en los sujetos que permanecían en casa que en aquellos hospitalizados. La terapia en el domicilio fue una opción más económica para las familias y para el hospital. Concluyeron que, a corto plazo, la terapia en el domicilio no se asocia a peores resultados para los pacientes y en general, reduce las alteraciones sociales. La decisión de intentar prestar el tratamiento a domicilio debe ser individualizada y basada en la disponibilidad de recursos locales apropiados.

Walters *et al.*<sup>16</sup> estudió los criterios de selección que deben cumplir los pacientes para optar a TADE en fibrosis quística. Este estudio, aleatorizado y controlado sobre 17 pacientes con FQ se concluyó que, aunque el aumento de los parámetros de función pulmonar (volumen espiratorio forzado en el primer segundo y capacidad vital forzada) después de la terapia antibiótica fue discretamente inferior en los enfermos que recibieron TADE, la mejoría de la mayoría de los parámetros que midieron la calidad de vida fue superior en los que recibieron el tratamiento en su domicilio. Además, se observó que existieron claras ventajas económicas cuando se llevó a cabo el tratamiento en el domicilio, siendo los efectos secundarios escasos en ambos grupos.

A destacar un consenso sobre TADE en fibrosis quística publicado en la revista Archivos de Bronconeumología (revista oficial de la Sociedad Española de Neumología y Cirugía Torácica, SEPAR) en el año 2003<sup>17</sup> cuyo objetivo fue diseñar un adecuado programa de asistencia domiciliaria dados sus importantes beneficios, ya que éste contribuye a mejorar la calidad de vida del paciente con

fibrosis quística y sus familias y supone un ahorro importante para el hospital. En ese consenso se concluye que las ventajas del TADE superan los inconvenientes, sobre todo porque permite al enfermo continuar su vida normal en el trabajo o los estudios, aspectos que se ponen más de manifiesto cuando el paciente llega a la edad adulta.

En 2008 se publicó un interesante estudio por Martínez Meca *et al.*<sup>18</sup> en el que se valoró la seguridad de los ciclos de TADE en una unidad de fibrosis quística, incluyendo datos de 55 pacientes en un periodo de 5 años. Se analizaron las características de los pacientes, tipo de antibioterapia, acceso venoso utilizado, así como los dispositivos de administración, complicaciones surgidas y resolución de las mismas. Su conclusión fue que el TADE es una modalidad terapéutica que, ajustándose a unos criterios de inclusión y exclusión predeterminados, presenta escasas complicaciones y permite reducir el número de estancias hospitalarias.

En nuestra propia experiencia neumológica con estos pacientes consideramos que el uso del TADE en esta patología aumente progresivamente en los próximos años debido a la mayor expectativa de vida de estos enfermos y que la terapia domiciliaria es la elegida por la población adulta con fibrosis quística. En manejo de TADE en domicilio incluso en modalidad de autoadministración.

### **OTROS: Absceso pulmonar. Trasplante pulmonar**

Como ya hemos revisado y comentado entre las patologías infecciosas respiratorias, la fibrosis quística, la neumonía y las reagudizaciones de la broncopatía crónica cuentan algunas, aunque escasas series publicadas, mientras que para otras entidades respiratorias, como el absceso pulmonar y el empiema, es prácticamente inexistente. Únicamente existen estudios en patología pleural y terapia domiciliaria centrados en los derrames neoplásicos y su drenaje paliativo. Tras revisar la literatura de forma exhaustiva hemos encontrado una revisión de pocos casos (n=20) de la unidad de Hospitalización a Domicilio del Hospital Vall d'Hebron durante los años 2006-2009<sup>19</sup> que evaluó la seguridad y la eficacia del tratamiento intravenoso en pacientes con empiema y/o absceso pulmonar realizado en el domicilio. Los criterios de inclusión para el ingreso en la unidad de domiciliaria fueron los habituales (estabilidad clínica, apoyo familiar, posibilidad de contacto telefónico y consentimiento informado), así como haber realizado un mínimo de una semana de tratamiento antibiótico por vía intravenosa intrahospitalario. La ausencia de drenaje de los abscesos y empiemas no fue un criterio de exclusión para continuar tratamiento antibiótico endovenoso en domicilio. Según los resultados de este estudio se ha objetivado una seguridad adecuada similar a otras patologías infecciosas respiratorias. Ningún drenaje torácico presentó complicaciones y se retiraron incluso sin complicaciones.



Por último, consideramos que en el caso de pacientes sometidos a trasplante pulmonar, también es posible realizar el seguimiento en unidades de Hospitalización a Domicilio con experiencia previa. La evitación de ingresos en pacientes inmunodeprimidos para recibir tratamientos parenterales tras rechazo crónico (esteroides parenterales) o bien por infecciones oportunistas (antivíricos parenterales, antifúngicos, antibióticos nebulizados) hacen que esta modalidad asistencial sea de gran utilidad. No existe literatura en este sentido, pero podemos aportar nuestra experiencia en la unidad de HaD del Hospital Universitario de Gran Canaria. En la actualidad y desde el año 2007 hemos realizado el tratamiento y seguimiento de 13 pacientes trasplantados pulmonares (6 fibrosis quística, 1 discinesia ciliar primaria, 1 linfangioleiomiomatosis, 3 EPOC grave, 1 HTP primaria grave) derivados desde consulta monográfica de Neumología por infecciones oportunistas o rechazo crónico, con buenos resultados y adecuado grado de satisfacción y sin complicaciones

## RECOMENDACIONES FINALES

- El TADE es seguro y efectivo en el tratamiento de las infecciones respiratorias (B-II)
- Las pautas de tratamiento antimicrobiano para las infecciones respiratorias deben ser las mismas que en pacientes hospitalizados convencionalmente incluyendo los antibióticos antipseudomónicos (C-III).
- No hay diferencias de seguridad y efectividad en el tratamiento de infecciones respiratorias con TADE: EPOC agudizado, neumonía de la comunidad (NAC), fibrosis quística (FQ) y bronquiectasias no-FQ (B-II).
- Existe escasa evidencia de infecciones respiratorias tipo absceso pulmonar y empiema pleural tratado con TADE (C-III)
- La duración del TADE en infecciones respiratorias será la misma que la aconsejada en los pacientes hospitalizados convencionalmente (B-II)
- El TADE en infecciones respiratorias por *Pseudomonas aeruginosa*, incluyendo las cepas multirresistentes, es seguro y efectivo (B-II).
- Los pacientes respiratorios crónicos deben continuar con las terapias respiratorias a domicilio necesarias (oxigenoterapia, aerosolterapia y ventilación no invasiva domiciliaria) así como otros tratamientos habituales en las agudizaciones respiratorias tales como esteroides intravenosos u orales (A-I)

## BIBLIOGRAFIA

1. Dalovisio JR, Juneau J, Baumgartem K, Kateiva J. Financial impact of a home intravenous antibiotic program on a Medicare managed care program. *Clin Infect Dis* 2000; 30: 639-42.
2. Esposito S, Noviello S, Leone S, Tice A, Seibold G, Nathwani D, Scaglione, International OPAT Registry. Outpatient parenteral antibiotic therapy (OPAT) in different countries: a comparison. *Int J Antimicrob Agents* 2004; 24: 473-8.
3. Goenaga MA, Millet M, Garde C, Carrera JA, Arzelus E. About the guidelines for outpatient parenteral antimicrobial therapy. *Clin Infect Dis* 2004; 39:1730-1.
4. Guideline for diagnosis and treatment of COPD Enfermedad Pulmonar Obstructiva Cronica (EPOC) – Spanish Guideline of COPD (GesEPOC). *Arch Bronconeumol*; 48:2-58 (2012)
5. Montóna C, Pomaresa C, Mujal A. Tratamiento antibiótico domiciliario endovenoso en la enfermedad respiratoria crónica. *Arch Bronconeumol* 2013; 49(4):173–175
6. Garde C, Millet M, Goenaga MA, Arzelus E, Cuende A, Sarasqueta C, *et al.* Tratamiento de la infección respiratoria por *Pseudomonas aeruginosa* en pacientes adultos en hospitalización a domicilio: características clínicas y evolutivas así como análisis de los factores pronósticos de recidiva. *Enferm Infecc Microbiol Clin* 2009; 27:257–62
7. Diaz Lobato S, Gonzalez Lorenzo F, Gómez Mendieta M.A., Mayoraes Alises S, *et al.* *Arch Bronconeumol* 2005; 41(1); 5-10
8. Ram S, Wedzicha JA, Wright J, Greenstone M. Hospital at home for patients with acute exacerbations of chronic obstructive pulmonary disease: systematic review of evidence. *Br Med J* 2004; 329:315-316.
9. Jeppesen E, Brurberg KG, Vist GE, Wedzicha JA, Wright JJ, Greenstone M, Walters JA. Hospital at home for acute exacerbations of chronic obstructive pulmonary disease. *Cochrane Database Syst Rev* 2012;5.
10. Auble T, Yealy D, Fine M. Assessing prognosis and selecting an initial site of care for adults with community-acquired pneumonia. *Inf Dis Clin Norh Am* 1998; 12:741-59.

11. Mirón Rubio M, Estrada Cuxart O, González Ramallo VJ. Protocolos de tratamiento antimicrobiano domiciliario endovenoso (TADE). 1ª edición. Madrid: Sociedad española de Medicina Interna. Capítulo XI. Neumonías adquiridas en la comunidad e infecciones pleurales.155-159. Elsevier 2008.
12. Richards D, Toop L, Epton M, McGeoch G, Town G, Wynn-Thomas S, *et al.* Home management of mild to moderately severe community- acquired pneumonia: A randomised controlled trial. *Med J Aust* 2005;183:235–8.
- 13.-Regalado de Los Cobos J, Felipe Aizpuru Barandiaran b, Esther Oceja Barrutieta, Maria de Juan Rodriguez, Leire Apraiz Ruiz *et al.* *Med Clin (Barc)* 2010; 135(2):47–51
14. Montón C, Pomares X, Mugal A. Tratamiento antibiótico domiciliario endovenoso en la enfermedad respiratoria crónica. *Arch Bronconeumol* 2013; 49:173–17
15. Marco T, Asensio O, Bosque M, de Gracia J, Serra C. Administración de antibióticos intravenosos en el domicilio para la fibrosis quística (Revisión Cochrane traducida). En: *La Biblioteca Cochrane Plus*, 2008 Número 4. Oxford: Update Software Ltd. Disponible en: <http://www.update-software.com>. (Traducida de *The Cochrane Library*, 2008 Issue 3. Chichester, UK: John Wiley & Sons, Ltd.).
16. Wolter JM, Bowler SD, Nolan PJ, McCormack JG. Home intravenous therapy in cystic fibrosis: a prospective randomized trial examining clinical, quality of life and cost aspects. *Eur Respir J* 1997; 10:896-900.
17. Escribano MA. Diagnóstico y tratamiento de la exacerbación infecciosa de la Fibris Quística. *Arch Bronconeumol* 2001; 37: 316-324
18. Martínez-Meca A, San Juan D, Fernández Peñalba ML, Gómez de María I, Requeijo E, *et al.* Seguridad del tratamiento antibiótico intravenoso domiciliario en pacientes adultos con fibrosis quística. *Rev Patol Respir* 2008; 11(2): 61-66
19. Pardos-Gea J, Maza U, Pérez-López J, San Jose Laporte A. *Enferm Infecc Microbiol Clin* 2011; 29(3):232–242.

## 8.E INFECCION INTRAABDOMINAL, ABSCEOS INTRAABDOMINALES E INFECCION DE VIA BILIAR

**Autor: Manuel Mirón Rubio.** Hospital de Torrejón. Madrid

### INTRODUCCION

No son frecuentes en la literatura las referencias al tratamiento de la infección intraabdominal (IIA) en los programas de antibioterapia parenteral ambulatoria. En el registro OPAT internacional con más de 10.000 casos no aparece listada entre las infecciones más frecuentes. Tampoco en otras series con elevado número de casos se hace referencia a este tipo de infección<sup>2-4</sup>, o el número de pacientes incluidos resulta anecdótico<sup>5</sup>. La mayoría de publicaciones se limitan a análisis descriptivos de patologías concretas como diverticulitis<sup>6-8</sup>, infección de vía biliar<sup>9,10</sup>, absceso hepático<sup>11,12</sup>, apendicitis<sup>13</sup> o fístula pancreática con infección<sup>14</sup>.

Esta escasez de información justifica la falta de consenso en los criterios de ingreso en programas TADE, tanto generales para la IIA como específicos para cada patología. En la actualidad estos criterios se basan en experiencias personales y opiniones de expertos. Así se han utilizado como criterios de ingreso en HAD para la diverticulitis aguda: edad < de 80 años, ASA I-II (clasificación de riesgo anestésico), ausencia de signos clínicos de complicación como peritonitis, vómitos o distensión abdominal severa, y un grado I-II en la clasificación de Hinchey<sup>7</sup>.

La mayoría de las IIA precisan un periodo previo de hospitalización o de estancia en una unidad de observación de urgencias debido a la necesidad de realizar procedimientos invasivos o quirúrgicos y a la evolución imprevisible de algunos procesos cuando se realiza tratamiento conservador. En base a las experiencias publicadas, sólo en la diverticulitis aguda no complicada resulta eficaz y seguro el tratamiento en HAD de pacientes procedentes directamente de Urgencias<sup>8</sup>. En estos pacientes se recomienda la valoración por el servicio de Cirugía previo al ingreso domiciliario. Para el resto de casos el periodo previo de hospitalización va a depender de la severidad de la infección y del nivel de resolución de la misma con procedimientos invasivos, por lo que habrá que individualizar cada caso.

Los datos disponibles del TADE en la IIA han mostrado buenos resultados de eficacia y seguridad. En dos trabajos sobre diverticulitis la evolución fue favorable en la totalidad de los casos y no hubo reingresos durante el periodo de TADE<sup>6,8</sup>. Los mismos resultados se obtuvieron en un estudio que incluía pacientes con colecistitis aguda<sup>9</sup>. El 97% de los 109 pacientes con absceso hepático en el estudio de Chang *et al.* presentó buena evolución, y el retorno al

hospital por cualquier causa se produjo únicamente en el 8% de los casos<sup>12</sup>. Este porcentaje llegó al 20% en un análisis español que incluía 30 pacientes<sup>11</sup>. En otro estudio con niños con apendicitis aguda la tasa de curación tras recibir TADE fue del 92%, mientras que sólo 6 de los 87 niños incluidos reingresaron por complicaciones. Tras el alta de HAD el porcentaje de reingresos varía entre el 0 y el 20% según el tipo de infección<sup>7,9,11</sup>. El riesgo de reingreso se ha relacionado con la fiebre y la edad mayor de 70 años en la diverticulitis aguda<sup>1</sup>, y en el absceso hepático con el tamaño y reducción del mismo en el momento del alta, el sexo femenino y el grado de dependencia del paciente<sup>11</sup>.

A pesar de estos buenos resultados existen muy pocos trabajos que comparen los resultados en HAD frente a hospitalización convencional, y los que hay no son aleatorizados<sup>6,7</sup>.

## RECOMENDACIONES GENERALES

Antes del traslado al domicilio los pacientes con IIA deben cumplir, con carácter general, una serie de requisitos:

- Diagnóstico establecido mediante valoración clínica y pruebas de imagen.
- Ausencia de fiebre o temperatura axilar en descenso en las últimas 24-48 horas.
- Mejoría clínica en las últimas 24-48 horas.
- Mejoría radiológica en las últimas 48-72 horas (excepto en aquellos casos en los que no esté indicado el control radiológico).
- Haber intentado el control del foco de infección mediante técnicas invasivas o quirúrgicas cuando esté indicado.
- Obtención de muestras para cultivo cuando sea posible.
- Valoración por el servicio de Cirugía General cuando los pacientes no procedan de este servicio.

El seguimiento del paciente en su domicilio consiste en:

- Contacto diario con el paciente, bien a través de visitas o llamada telefónica
- Visitas médicas con una frecuencia ajustada a las necesidades de cada caso
- Coordinación y comunicación con los servicios de procedencia del paciente (o Cirugía General), Microbiología y, según los casos, con Radiología y Radiología Intervencionista.
- Realización de cuantos controles clínicos, analíticos, radiológicos y microbiológicos sean necesarios para el tratamiento y resolución de la infección.

## TRATAMIENTO ANTIMICROBIANO

En general, podemos considerar que las pautas de tratamiento antimicrobiano de la IIA así como su duración en régimen de TADE deben ser las mismas que para los pacientes en hospitalización convencional.

Se ha establecido con claridad la duración del tratamiento de la IIA cuando se consigue un control adecuado del foco de infección mediante técnicas invasivas o quirúrgicas<sup>15</sup>. Se recomiendan 3 días de tratamiento en la infección leve-moderada, sin factores de riesgo de mala evolución y control de foco adecuado. En la infección grave en el paciente sin shock séptico, control de foco adecuado, recuperación del funcionalismo intestinal y descenso de la PCR mayor o igual al 50% en relación a los valores del día del control de foco se recomiendan 5 días de tratamiento<sup>15</sup>. En el resto de casos la duración del tratamiento debe adecuarse al tipo de infección, gravedad, respuesta clínica y evolución de los marcadores de respuesta inflamatoria.

Las IIA se clasifican en función de diversos criterios entre los que se incluyen: lugar de adquisición de la infección, gravedad, existencia de factores de riesgo de mala evolución y realización de cirugía. La diversidad de situaciones existentes al aplicar estos criterios implica también numerosas opciones terapéuticas. A continuación, se especifican algunas recomendaciones de tratamiento antimicrobiano empírico en base a guías y recomendaciones previamente publicadas<sup>15,16</sup> y se comenta la aplicabilidad de cada una de ellas en el ámbito ambulatorio.

### INFECCIÓN COMUNITARIA LEVE-MODERADA

#### **Sin factores de riesgo de mala evolución:**

Ertapenem es el fármaco que tiene un perfil de administración más adecuado en el ámbito ambulatorio. Una alternativa es la combinación de ceftriaxona y metronidazol. Amoxicilina-clavulánico requiere la participación de un cuidador en la reconstitución y administración del fármaco. Además, el uso de este fármaco está en la actualidad condicionado por los niveles locales de resistencia de *E. coli*, con tasas de 12-15 % de resistencia en aislamientos abdominales. La combinación de gentamicina (en dosis única diaria) o aztreonam (administrado con bomba electrónica de infusión o bomba elastomérica) y metronidazol son alternativas de tratamiento en pacientes alérgicos a betalactámicos.

#### **Con factores de riesgo de mala evolución:**

Ertapenem tiene un perfil de uso más adecuado que tigeciclina que debe administrarse dos veces al día y no es estable a temperatura ambiente, por lo que requiere dos visitas de enfermería o la autoadministración por paciente y/o cuidador. Un estudio puso de manifiesto que tigeciclina puede ser eficaz en dosis única diaria<sup>17</sup>, lo que facilitaría su uso en el ámbito ambulatorio.

## INFECCIÓN COMUNITARIA GRAVE Y NOSOCOMIAL POSOPERATORIA

- **Sin factores de riesgo de mala evolución:** Piperacilina-tazobactam es estable 24 horas a temperatura ambiente por lo que puede administrarse con bomba electrónica de infusión, lo cual facilita el uso con respecto a tigeciclina. También puede utilizarse en bomba elastomérica. Debe asociarse fluconazol en los casos de riesgo de infección por *Candida* sp..
- **Con factores de riesgo de mala evolución:** Meropenem, imipenem y tigeciclina son inestables a temperatura ambiente por lo que deben conservarse refrigerados y su administración requiere la participación del paciente o de un cuidador o dos visitas de enfermería al día en el caso de tigeciclina. Debe asociarse fluconazol en los casos de riesgo de infección por *Candida* sp.. En los pacientes con foco biliopancreático y con una manipulación reciente de la vía biliar (colangiografía retrógrada endoscópica), el tratamiento debe ser activo frente a *P. aeruginosa*.

## INFECCIÓN RECIDIVANTE-PERSISTENTE (PERITONITIS TERCIARIA)

La necesidad de combinar fármacos dificulta el tratamiento de estas infecciones en régimen ambulatorio. Una pauta incluye meropenem (o imipenem), glucopéptido o linezolid, y fluconazol (o candina). La combinación de tigeciclina y amikacina (junto a fluconazol o candina) es una alternativa en pacientes alérgicos a betalactámicos. En todos los casos es necesaria una participación activa del paciente o cuidador para la administración de los fármacos por vía intravenosa.

## INFECCIÓN DE LA VÍA BILIAR

En la colecistitis aguda y la colangitis aguda leve/moderada el tratamiento empírico sugerido es ertapenem. Está indicado amoxicilina- clavulánico en la colecistitis leve sin factores de riesgo de mala evolución, con las limitaciones de uso ya comentadas. La colangitis aguda grave debe tratarse con drenaje endoscópico y un antibiótico con cobertura enterocócica (piperacilina-

tazobactam) o meropenem si hay factores de riesgo de organismos productores de bacterias tipo BLEE.

## NOTAS ADICIONALES

En pacientes con riesgo de infección por *P. aeruginosa* o es preciso añadir un fármaco antipseudomónico específico como amikacina, ceftazidima o cefepima. Debe contemplarse la administración de ceftolozano-tazobactam, ceftazidima-avibactam o colistina en aquellos pacientes tratados previamente con un antibiótico con actividad antipseudomónica y que presenten persistencia o recidiva de la IIA.

En los pacientes con riesgo de infección por *Candida* sp. debe añadirse tratamiento antifúngico. Las candidas están indicadas en los pacientes afectos de sepsis grave o shock séptico y en aquellos que han recibido previamente fluconazol.

## RECOMENDACIONES FINALES

- Cualquier IIA puede tratarse en régimen de TADE cuando se cumplen los requisitos para prestar atención sanitaria según este modelo asistencial (C-III)
- La mayoría de las IIA requieren un periodo previo de hospitalización convencional antes del tratamiento en domicilio. Sólo la diverticulitis no complicada puede ser tratada directamente desde Urgencias (B-III)
- Las pautas de tratamiento antimicrobiano de la IIA así como su duración en régimen de TADE deben ser las mismas que para los pacientes en hospitalización convencional (C-III)

## BIBLIOGRAFÍA

1. Esposito S, Noviello S, Leone S, Tice A, Seibold G, Nathwani D, Scaglione F; International OPAT Registry. Outpatient parenteral antibiotic therapy (OPAT) in different countries: a comparison. *Int J Antimicrob Agents* 2004; 24: 473-8.
2. Barr D.A, Semple L, Seaton R A. Outpatient parenteral antimicrobial therapy (OPAT) in a teaching hospital-based practice: a retrospective cohort study



- describing experience and evolution over 10 years. *Int J antimicrob Agents* 2012; 39(5): 407-13.
3. Williams DN. Home intravenous antibiotic therapy (HIVAT): indications, patients and antimicrobial agents. *Int J Antimicrob Agents* 1995; 5(1): 3-8.
4. Seetoh T, Lye DG, Cook AR, *et al.* An outcomes análisis of outpatient parenteral antibiotic therapy (OPAT) in a large Asian cohort. *Int J Antimicrob Agents* 2013; 41(6):569-73.
5. Chapman AL, Dixon S, Andrews D, Lillie PJ, Bazaz R, Patchett JD. Clinical efficacy and cost-effectiveness of outpatient parenteral antibiotic therapy (OPAT): a UK perspective. *J Antimicrob Chemother* 2009; 64: 1316-24.
6. Rodríguez-Cerrillo M, Poza-Montoro A, Fernandez-Diaz E, Matesanz-David M, Iñurrieta Romero A Treatment of elderly patients with uncomplicated diverticulitis, even with comorbidity, at home". *Eur J Intern Med* 2013; 24:430-2.
7. Rueda JC, Jimenez A, Caro A, Feliu F, Escuder J, Gris F, Spuch J, Vicente V Home Treatment of Uncomplicated Acute Diverticulitis. *Int Surg* 2012; 97: 203-9.
8. Rodríguez-Cerrillo M, Poza-Montoro A, Fernandez-Diaz E, Romero AI. Patients with uncomplicated diverticulitis and comorbidity can be treated at home. *Eur J Intern Med* 2010; 21(6): 553-4.
9. Rodríguez-Cerrillo M, Poza-Montoro A, Fernandez-Diaz E, Iñurrieta-Romero A, Matesanz-David M. Home treatment of patients with acute cholecystitis. *Eur J Intern Med* 2012; 23: e10-e13.
10. Shin JH, Chang EY, Chang HK, Kim SM, Han SJ. Home intravenous antibiotic treatment for intractable cholangitis in patients with biliary atresia following Kasai portoenterostomies. *J Korean Surg Soc* 2011; 80(5): 355-61.
11. Pardos-Gea J, Pérez-López J, San José Laporte A, Vilardell Tarrés M. Home intravenous antibiotic therapy of hepatic abscess: Safety, efficacy and predictive factor of hospital readmission. *Med Clin (Barc)* 2010; 134(11): 473-6.
12. Chan DS, Archuleta S, Llorin RM, Lye DC, Fisher D. Standardized outpatient management of *Klebsiella pneumoniae* liver abscesses. *Int J Infect Dis* 2013; 17(3):e185-8.
13. Bradley JS, Behrendt CE, Arrieta AC, Harrison CJ, Loeffler AM, Iaconis JP, Wald ER. Convalescent phase outpatient parenteral antiinfective therapy for children with complicated appendicitis. *Pediatr Infect Dis J* 2001; 20(1): 19-24.
14. Home treatment of patients with pancreatic fistula. Spuch JA, Mirón M, Florit L, Escuder J, Castellote M, Zornoza A. *Cir Esp* 2008 Mar; 83(3): 129-33.
15. Guirao X, Arias J, Badía JM, García-Rodríguez JA, Mensa J, Alvarez-Lerma F, *et al.* Recomendaciones en el tratamiento antibiótico empírico de la infección intraabdominal. *Cir Esp* 2010; 87(2): 63-81.
16. Solomkin JS, Mazuski JE, Bradley JS, Rodvold KA, Goldstein EJ, Baron EJ, *et al.* Diagnosis and Management of Complicated Intra-abdominal Infection in

Adults and Children: Guidelines by the Surgical Infection Society and the Infectious Diseases Society of America. *Clin Infect Dis* 2010; 50(2): 133-64.

17. Lefort A, Lafaurie M, Massias L, Petegnief Y, Saleh-Mghir A, Muller-Serieys C, Le Guludec D, Fantin B: Activity and diffusion of tigecycline (GAR-936) in experimental enterococcal endocarditis. *Antimicrob Agents Chemother* 2003, 47(1): 216-22

## 8.F INFECCIONES OSTEOARTICULARES.

**Autor: M<sup>a</sup> Montserrat Gómez Rodríguez de Mendarozqueta.** Hospital Universitario de Alava.

### INTRODUCCIÓN

Las infecciones osteoarticulares (IOA) suelen requerir un tratamiento antibiótico prolongado, con duraciones comprendidas entre las 2 semanas y los 3-6 meses<sup>1</sup>. En este contexto de tratamiento antibiótico prolongado y de infecciones causadas por patógenos no susceptibles a las opciones de tratamiento orales, el tratamiento antibiótico domiciliario endovenoso (TADE) es una opción a considerar que evita la hospitalización convencional prolongada. Las IOA representan una de las principales indicaciones de TADE, práctica clínica que se utiliza desde hace más de 30 años en muchos países, con suficiente evidencia para apoyar su justificación clínica y rentabilidad. Las cohortes de mayor tamaño muestral publicadas con un adecuado periodo de seguimiento clínico sobre TADE en IOA provienen de Singapur, Glasgow (Reino Unido), Washington (EE.UU.) e Italia que realizan un seguimiento a largo plazo, siendo de hasta 27 meses en la serie de Washington<sup>2,3</sup>.

La duración óptima del tratamiento con antibióticos y la vía de administración no están bien definidas. Un estudio francés evaluó el TADE en infecciones óseas crónicas, concluyendo que el TADE prolongado no necesariamente mejora los resultados, pero sí aumenta los efectos adversos<sup>7</sup>. El tratamiento endovenoso de las IOA puede ser continuado con terapia secuencial oral<sup>1,5</sup>. Antes de iniciar el TADE se debe objetivar la respuesta clínica y analítica. Es recomendable un acceso venoso adecuado y optar por un antimicrobiano con un perfil farmacocinético óptimo<sup>3,6</sup>. Las pautas de tratamiento antibiótico para TADE no difieren de las usadas en hospitalización convencional. Existe un metaanálisis publicado de gran tamaño muestral que no mostró diferencias entre la utilización de TADE y la hospitalización en regimen convencional<sup>9</sup>.

## Recomendaciones generales específicas para programas de TADE

Entre los criterios de inclusión para TADE de IOA están los criterios generales referidos en el capítulo 2 de este documento de consenso, la necesidad de antibiótico parenteral, y la elección de éste según los resultados de los cultivos microbiológicos y la susceptibilidad antimicrobiana. El tratamiento antibiótico de las IOA se debe iniciar empíricamente, tras la toma de las muestras microbiológicas, en régimen de hospitalización convencional<sup>2,3,6</sup>. Una vez que se dispone del resultado del cultivo se puede plantear el tratamiento en programa de TADE, tras objetivar la respuesta clínica y analítica, así como la existencia de suficiente estabilidad clínica para ser atendido en domicilio, tanto respecto a la propia infección como a las posibles comorbilidades asociadas<sup>2,3,6</sup>. Es recomendable disponer de un acceso venoso adecuado (catéter venoso central o central de inserción periférica) y el antimicrobiano seleccionado debe tener un óptimo perfil farmacocinético (vida media larga, máxima estabilidad de la solución reconstituida cuando se deba administrar más de una dosis), una adecuada tolerancia por parte del paciente e idealmente una baja incidencia de reacciones tóxicas<sup>2,3,6</sup>.

Entre los criterios de exclusión se encuentran la incapacidad del paciente y/o el cuidador de comprender los riesgos del tratamiento parenteral y mantener un cuidado apropiado del catéter venoso. También lo serían el hecho de no poder realizar un transporte adecuado de la medicación hasta el domicilio, así como la imposibilidad de realizar un seguimiento clínico y analítico adecuado, para minimizar el riesgo de efectos adversos. Esto es de trascendencia porque alrededor del 25% de los pacientes pueden presentar eventos adversos relacionados con el TADE<sup>2,3</sup>. Las más frecuentes son las complicaciones gastrointestinales, la toxicidad relacionada con el antibiótico, así como la necesidad de reingreso y/o complicaciones asociadas al acceso venoso.

Durante el tratamiento antibiótico domiciliario de las IOA se recomienda realizar control clínico al menos dos veces por semana y control analítico al menos una vez a la semana (hemograma, perfil hepático, función renal, VSG, PCR, CPK (en el caso de utilizar daptomicina), lactato (en el caso de linezolid), monitorización de niveles plasmáticos de fármacos (vancomicina, aminoglucósidos, entre otros), controles microbiológicos según evolución y control radiológico tras varias semanas de tratamiento<sup>2,3,7</sup>. Se debe vigilar la toxicidad renal de los antibióticos, especialmente en paciente con disfunción renal<sup>3</sup>. En la actualidad, hay muy buenos resultados obtenidos con daptomicina en IOA, con menor incidencia de toxicidad en comparación con los glicopéptidos<sup>11,13,17,20</sup>.

Con frecuencia, en presencia de material protésico el tratamiento de las IOA precisa de la combinación de al menos dos antibióticos así como cirugía precoz. El adecuado control quirúrgico de la lesión disminuye la recurrencia, la

necesidad de reingreso, preserva el tejido viable y prevenir la infección sistémica recurrente<sup>1,9,18</sup>.

Una coordinación con los Servicios de Traumatología e Infecciosas y una correcta educación del paciente y cuidador sobre el proceso, posibles complicaciones y efectos adversos son importantes para el éxito del tratamiento<sup>2,3</sup>.

### **Tratamiento antibiótico**

El tratamiento parenteral seguido de tratamiento antibiótico oral es tan eficaz como el tratamiento parenteral de duración prolongada<sup>1,18,19</sup>

Aunque tradicionalmente se elegía la vía intravenosa debido a la baja biodisponibilidad oral de determinados fármacos, actualmente disponemos de antibióticos orales con buena difusión en el tejido óseo y con adecuada tolerabilidad como es el caso rifampicina, quinolonas y linezolid, que se utilizan para desescalar a un tratamiento antimicrobiano oral optimizado<sup>18,21</sup>.

En el caso de tratamientos prolongados, debemos tener en cuenta el posible desarrollo de efectos secundarios, como el desarrollo de mielotoxicidad reversible en tratamientos de más de 15 días y neuropatía en aquellos de más de un mes en relación a linezolid. En ningún caso se debe utilizar rifampicina en monoterapia, ni en terapia combinada en los primeros días de tratamiento antibiótico debido al alto riesgo de aparición de resistencias y a que puede presentar un efecto antagónico con otros fármacos bactericidas (betalactámicos, glucopéptidos, quinolonas) excepto la daptomicina, disminuyendo la actividad bactericida de los mismos por mecanismos que no están del todo claros. Rifampicina se incorpora generalmente tras completar al menos 3-5 días de tratamiento con un primer antibiótico<sup>21</sup>.

La elección del antimicrobiano depende de la susceptibilidad *in vitro* del patógeno, la presencia de comorbilidades, el metabolismo del fármaco y la diseminación en el hueso. Los fármacos más utilizados son cloxacilina, ceftriaxona o cefazolina frente a *S. aureus* susceptible a la meticilina (clindamicina en caso de alergia) y vancomicina (incluida la infusión continua) o teicoplanina frente SARM. La indicación clínica de las penicilinas semisintéticas (ampicilina y amoxicilina) se limitan a la infección enterocócica osteoarticular.

## Tratamiento antibiótico en osteomielitis

La edad del paciente determina el parte el patógeno causante de la osteomielitis. *S. aureus* es la causa más frecuente de osteomielitis hematógena aguda (siendo muy rara en adultos, se presenta sobre todo en vértebras y es más frecuente en la quinta y sexta décadas de la vida).

La osteomielitis subaguda- crónica suele ser secundaria a fracturas abiertas, postquirúrgicas, o infecciones contiguas (creciente prevalencia de infecciones del pie diabético y de enfermedad vascular periférica) y con frecuencia se asocia a la existencia de material de osteosíntesis. Suele ser polimicrobiana (*S. epidermidis*, *Pseudomonas aeruginosa*, *Serratia marcescens* y *Escherichia coli*). La frecuencia con la que se aísla SARM en pacientes con osteomielitis es cada vez mayor.

Se han descrito infecciones causadas por anaerobios, habitualmente asociadas a la extensión contigua de un foco infeccioso, infecciones fúngicas y micobacterianas en pacientes con osteomielitis, aunque éstas son poco frecuentes y generalmente se encuentran en pacientes inmunodeprimidos.

Los regímenes de tratamiento dirigido recomendados se describen a continuación:

- *S. aureus* meticilin sensible (SAMS): Cloxacilina 2gr/6 h. Precisa de la utilización de bomba de infusión portátil electrónica o dispositivo elastomérico refrigerados con recambios con la colaboración del paciente), cefazolina 2 gr/8 h (precisa utilización de bomba de infusión portátil electrónica). En pacientes alérgicos se podría utilizar clindamicina 600 mg cada 8 horas (precisará el uso de bomba electrónica)<sup>1,3</sup>.
- *S. aureus* meticilin resistente (SAMR): se recomienda utilizar vancomicina (precisa bomba de infusión portátil electrónica) a dosis de 15-20 mg/kg/12h para pacientes con función renal normal<sup>1,5,9</sup>. En el caso de cepas con resistencia intermedia a glicopeptidos (GISA) y /o pacientes con intolerancia a los mismos se recomienda la utilización de linezolid 600 mg iv/12h (precisa administración i.v intermitente, de forma manual, dado que no es estable a Tª ambiente). Dada la alta biodisponibilidad oral del linezolid su utilización i.v estaría recomendada cuando no se pudiera utilizar la vía oral. Otra alternativa es utilizar fluorquinolonas (levofloxacino 750 mgr/24 h i.v junto a rifampicina 600 mg/24 h vo<sup>15,19</sup>.
- *Staphylococcus coagulasa negativo* (SCN) meticilin sensible: el tratamiento recomendado es similar al de SAMS, pero la mayoría de las cepas del SNC son resistentes a meticilina; por ello, con frecuencia se plantea la utilización de vancomicina y linezolid<sup>1,5,19</sup>.

- *Streptococcus* sp. ó enterobacterias: puede emplearse ceftriaxona 2 gr/24 h. En alérgicos a betalactámicos se podría emplear quinolonas : Levofloxacino 500–750 mg/24 h vo; Ciprofloxacino, 400 mg/12 h iv or 750–1000 mg/12 h vo.<sup>1,5,19</sup>
- *Enterococcus* sp.: en el caso de *E. faecalis* puede emplearse ampicillina 2 gr/4h-6 h iv (precisa bomba de infusión electrónica). En el caso de *E. faecium* y pacientes alérgicos a betalactámicos puede emplearse vancomicina 15-20 mg/kg/12 h. En el caso de *Enterococcus* sp. resistente a glicopeptidos, se podría emplear daptomicina 8-10 mg/kg/24 h<sup>13,17,20,21</sup>.
- *Pseudomonas aeruginosa*: existen varias posibilidades para TADE, que en general implican el uso de bombas de infusión electrónicas, como Piperacilina/tazobactam 4/0.5 gr/8h ó Ceftazidima 2 gr/8 h iv.<sup>1,5,12</sup>.
- Otros bacilos Gram negativos: el tratamiento debe adaptarse al antibiograma de las cepa aislada. algunas opciones son levofloxacino 500 -750 mgr/24h v.o o ceftriaxona 2gr/24h i.v.<sup>4</sup>.

La duración del tratamiento en la osteomielitis es entre 4 y 8 semanas (incluso 12 semanas si material de osteosíntesis). La mayoría de los autores recomiendan realizar tratamiento antibiótico por vía parenteral durante no menos de 2 semanas con posterior transición a tratamiento oral<sup>1,18,19</sup>.

### Tratamiento antibiótico en espondilodiscitis aguda

Los regimenes de tratamiento dirigido recomendados se describen a continuación:

- SAMS y SCN sensible a meticilina: Cloxacilina 2 g/6h iv (+ rifampicina 600 mg/24 h IV o VO en caso de presencia de material protésico) con terapia secuencial a levofloxacino 500-750 mg/12-24h o linezolid 600 mg/12h + rifampicina 300-450 mg/12h vo,
- SAMR o en caso de alergia a betalactámicos: Vancomicina 15-20 mg/kg/12h IV o linezolid 600 mg/12h IV o daptomicina 6 mg/kg/24h IV+ rifampicina 300-450 mg/12h vo

Daptomicina ofrece la ventaja para TADE de emplearse en una única dosis diaria. El registro EURO-CORE recopiló información de pacientes tratados con distintos regimenes a nivel europeo. Veinticinco de ellos recibieron daptomicina en régimen de tratamiento domiciliario a dosis 4–6 mg/kg/24h con una

duración mediana de 14 días, sin que se observaron efectos adversos relevantes<sup>11,13,20</sup>.

La duración del tratamiento será de 2 semanas por vía IV y 4-6 semanas por vía oral. En caso de espondilodiscitis aguda por SARM, se recomienda tratamiento por vía endovenosa durante 4 semanas y una duración total de al menos de 12 semanas.

### **Tratamiento antibiótico en artritis séptica**

El tratamiento antibiótico se inicia tras realizar drenaje precoz de la articulación para disminuir la destrucción articular, reducir la presión intraarticular y obtener muestras de líquido sinovial, hemocultivos y otros cultivos en función del contexto clínico. Debe cubrir el espectro bacteriano más probable en adultos. Por tanto ser activo frente a *S. aureus*, incluyendo el SAMR, seguido de *Streptococcus* sp. y bacilos Gram negativos. Si existe sintomatología que sugiera infección por *Neisseria meningitidis*, o *Neisseria gonorrhoeae*, se debe dirigir el tratamiento hacia estos gérmenes<sup>10</sup>.

La duración del tratamiento IV debe ser al menos de 1-2 semanas (en función de apirexia, mejoría clínica y descenso de PCR) continuando posteriormente por vía oral hasta completar 4-6 semanas<sup>14,7</sup>.

Las pautas de tratamiento específicas para cada microorganismo en régimen de TADE, no deben variar de las usadas en hospitalización convencional, con algunas particularidades<sup>3,7,9,10,14</sup>.

- En la artritis por SAMS se recomienda en TADE cloxacilina 2 gr/6h iv.. En pacientes alérgicos betalactámicos es posible emplear clindamicina 600 mg/8 horas iv.<sup>11</sup>. Es posible realizar tratamiento secuencial vía oral con clindamicina 450 mg/6-8h o cefadroxilo 1 g/8h-12h.
- En la artritis por SAMR se recomienda en TADE utilizar vancomicina a dosis de 15-20 mg/kg/12h IV para pacientes con función renal normal, linezolid 600 mg/12 h iv (cuando no es posible su utilización oral) o daptomicina 8-10 mg/kg/24 h IV. Es posible realizar terapia secuencial por vía oral con cotrimoxazol 160/800 mg un comp/8h o clindamicina 450/6-8h o linezolid 600 mg/12 h. La dosis de cotrimoxazol puede disminuirse a dosis de 2 comprimidos/12 horas y en caso de intolerancia hasta 1 comp/8h o 12 horas. Debe asociarse ácido fólico a dosis de 15 mg/24h.

- En la artritis séptica por *Streptococcus sp.* (*S. pneumoniae*, *pyogenes* y *agalactiae*) para TADE se recomienda ceftriaxona 2 g/24h. Es posible realizar terapia secuencial con amoxicilina 1 g/8h o levofloxacino 500 mg/24h. En infecciones por *S. pyogenes* se recomienda asociar clindamicina. En infecciones por *S. agalactiae* valorar asociar un aminoglucósido. En infecciones estreptocócicas la duración puede reducirse a 2-4 semanas.
- En la artritis séptica por *Neisseria spp* es posible emplear ceftriaxona 2 gr/24h IV durante 10-14 días. Tras la mejoría clínica puede utilizarse cefixima 200 mg/12h o una fluorquinolona (ciprofloxacino 750 mg/12 h o levofloxacino 500 mg/día) por vía oral.
- En artritis por enterobacterias puede emplearse ceftriaxona 2 g/24h. En tratamiento secuencial puede utilizarse ciprofloxacino 750 mg/12h.
- En artritis por *P. aeruginosa* como opciones para TADE, siempre según antibiograma tenemos piperacilina/tazobactam 4/0.5 gr/8h o ceftazidima 2 gr/8 h iv. o cefepima 2 gr/8 h. En cepas susceptibles es posible realizar terapia secuencial con ciprofloxacino 750 mg/12 VO.

### Tratamiento antibiótico en bursitis aguda

En casos de sepsis o pacientes inmunocomprometidos se administrará tratamiento IV. La bursitis prepatelar tiene una mayor agresividad clínica, por lo que recomienda antibioterapia IV.

La duración del tratamiento antibiótico será de 7-10 días. En pacientes con sepsis o inmunocomprometidos la duración del tratamiento IV será de 10-14 días, completando posteriormente 7-10 días de tratamiento oral.

- Si SAMS: Cloxacilina 2 g/4-6h IV o clindamicina 600mg/8h IV
- Si SAMR o sepsis: Vancomicina 15-20 mg/kg/12 h IV, linezolid 600 mg/12 h IV (si no es posible su utilización por vía oral, dada su excelente biodisponibilidad oral), o daptomicina 8-10 mg/kg/24 h IV<sup>7,10,14</sup>.

### Tratamiento antibiótico en infecciones de prótesis articulares

La infección de la prótesis articular es una grave complicación del implante de la misma, a veces de difícil diagnóstico. Precisa con frecuencia de tratamiento



quirúrgico y tratamiento antibiótico prolongado. El tipo de cirugía y el tratamiento antibiótico dependen del tiempo de evolución de la infección, del microorganismo causante y de las características individuales de cada paciente.

La duración del tratamiento IV en caso de una Infección protésica aguda (IPA) o infección hematógena aguda (IHA) será de 2-4 semanas. Posteriormente la terapia secuencial se mantendrá VO durante 8-10 semanas más, realizándose en total un mínimo de 12 semanas. La duración del tratamiento IV en caso de una infección protésica tardía o crónica (IPC) será de 1-2 semanas. Se continuará con terapia secuencial por vía oral hasta cumplir 6 semanas tras la retirada del implante. En caso de realizarse recambio en un tiempo, la duración total será de 6-8 semanas.

El antibiótico utilizado debe ser bactericida, poseer un espectro de actividad contra gérmenes que se adhieren a las superficies, son de lento crecimiento y producen biopelículas. En un estudio multicéntrico realizado en Italia las infecciones de prótesis representaron el 20% de las infecciones osteoarticulares tratadas en régimen de TADE<sup>16</sup>.

Los regímenes de tratamiento dirigido recomendados se describen a continuación:

- En infecciones causadas por *S. aureus* meticilin sensible y SCN sensible, cloxacilina 2 g/4 h iv (en bomba de infusión electrónica) ± rifampicina en caso de existir material protésico durante 7 a 14 días. Para continuar con tratamiento secuencial con levofloxacino 750 mg/24h vo, + rifampicina 600 mg/24h vo<sup>8</sup>
- En infecciones causadas SARM y o resistente a meticilina, se recomienda en TADE vancomicina 1 g/12h (15-20 mg/kg/12h) iv o daptomicina 8–10 mg/kg/24 h iv + cloxacilina 2 g/4 h iv. Para continuar con tratamiento secuencial con levofloxacino 750 mg/24h vo. + rifampicina 600 mg/24h v.o<sup>8</sup>
- En alérgicos a B-lactámicos daptomicina 8–10 mg/kg/24 h iv + fosfomicina, 2 g/6 h iv (en bomba de infusión electrónica)<sup>8</sup>.

Aunque daptomicina tiene un adecuado perfil para el tratamiento de la infección articular protésica, no hay todavía un elevado número de estudios de su uso en TADE<sup>17</sup>. Sin embargo, es bien tolerado y no precisa monitorización de niveles séricos.

- En infecciones de prótesis por *Streptococcus* spp. puede utilizarse en TADE ceftriaxona 2 g/24h. En este caso la duración del tratamiento i.v es

de 2-6 semanas. Alternativa en pacientes alérgicos a betalactámicos, vancomicina 1 g/12h (15-20 mg/kg/12h) iv. Para continuar con tratamiento secuencial levofloxacin 750 mg/24h vo, ± rifampicina 600 mg/24h vo <sup>15,18, 8</sup>.

- Si el germen implicado en la infección es *Enterococcus* sensible a penicilina, se puede utilizar ampicilina 12 gr/24h en infusión continua o 2 g/6 h (ambas pautas precisan el uso de una bomba de infusión electrónica)<sup>15,18</sup>
  - *E. faecalis*: ampicilina 2 g/6 h iv; ± Ceftriaxone iv 2 g/24 h. En alérgicos a betalactámicos, es posible utilizar vancomicina iv 1 g/12 h (15-20 mg/kg/12 h) durante 2-6 semanas, antes de desescalar a tratamiento oral, con amoxicilina 1 g/ 8h vo. (linezolid en alérgicos) ± rifampina vo. <sup>8</sup>
  - *E. faecium*: vancomicina 1 g/12h (15-20 mg/kg/12h) iv durante 2-6 semanas, posteriormente se puede continuar con tratamiento con Linezolid vo <sup>8</sup>
- Si el germen responsable es *P. aeruginosa* puede emplearse meropenem 1 gr/8h iv (en infusor elastomérico en frío), piperacilina/tazobactam 4g/8h, ceftazidima 2 gr/8h iv. Para terapia secuencial en base al antibiograma, ciprofloxacino 750 mg/12h vo <sup>15,18</sup>.
- Para infecciones por *Enterobacter* sp: piperacilina/tazobactam 4,5 g/8h, meropenem 1g/8h o ertapenem 1 g/24h. Piperacilina/tazobactam y meropenem se administrarán preferiblemente en perfusión extendida. Para terapia secuencial puede emplearse ciprofloxacino 750 mg/12h según antibiograma<sup>15,18</sup>.

En el caso de no disponer de cultivos o ser estos negativos, la mayoría de los expertos recomiendan el uso de vancomicina 1g/12 h i.v o daptomicina 8- 10 mg/Kg/24h (por ser los estafilococos los responsables de la mayoría de las infecciones) + ceftazidima 2 g/8h o cefepime 1 g/8 h (se puede usar en perfusión continua a partir de la 2ª dosis). En alérgicos a betalactámicos vancomicina o daptomicina iv + aztreonam 2 g/8 h iv.

## RECOMENDACIONES FINALES

- El tratamiento de las IOA requiere en ocasiones de la combinación de tratamiento quirúrgico y tratamiento antibiótico (A-II)
- El tratamiento parenteral seguido de tratamiento antibiótico oral es tan eficaz como el tratamiento parenteral a largo plazo. (B-III)

- Se aconseja una coordinación estrecha con los servicios de traumatología y enfermedades infecciosas (B-III).
- Las pautas de tratamiento antimicrobiano de las IOA así como su duración en régimen de TADE deben ser las mismas que para los pacientes en hospitalización convencional (C-III)
- Cuando se realiza correctamente, el TADE ofrece mayor comodidad para el paciente, disminuye el riesgo de infecciones nosocomiales y reduce el costo para el sistema de salud (B-III).

## BIBLIOGRAFIA

1. Hatzenbuehler J, Pulling TJ. Diagnosis and management of osteomyelitis. *Am Fam Physician* 2011; 84(9):1027-33.
2. Chapman AL, Seaton RA, Cooper MA, Hedderwick S, Goodall V, Reed C, Sanderson F, Nathwani D; BSAC/BIA OPAT Project Good Practice Recommendations Working Group. Good practice recommendations for outpatient parenteral antimicrobial therapy (OPAT) in adults in the UK: a consensus statement. *J Antimicrob Chemother* 2012; 67(5):1053-62.
3. Candel FJ, Julián-Jiménez A, González-Del Castillo J. Current status in outpatient parenteral antimicrobial therapy: a practical view. *Rev Esp Quimioter* 2016; 29(2):55-68.
4. MacKenzie M, Rae N, Nathwani D. Outcomes from global adult outpatient parenteral antimicrobial therapy programmes: A review of the last decade. *International Journal of Antimicrobial Agents* 2014; 43: 7– 16
5. Conterno LO, Turchi MD. Antibiotics for treating chronic osteomyelitis in adults. *Cochrane Database Syst Rev* 2013; 9: CD004439.
6. Tice AD, Rehm SJ, Dalovisio JR, Bradley JS, Martinelli LP, Graham DR, *et al.* N. Practice guidelines for outpatient parenteral antimicrobial therapy. *Clin Infect Dis* 2004; 38:1651–72.
7. T. Galpérine, F. Ader, P. Piriou, T. Judet, C. Perronne, L. Bernard. Antibiothérapie parentérale ambulatoire (APA), par voie intraveineuse dans les infections ostéoarticulaires Outpatient parenteral antimicrobial therapy (OPAT) in bone and joint infections. *Médecine et maladies infectieuses* 2006; 36: 132– 137
- 8.. Ariza J, Cobo J, Baraia-Etxaburu J, De Benito N, Bori G, Corona P, Esteban J, Horcajada JP, Lora-Tamayo J, Murillo O, Palomino J, Parra J, Pigrau C, Del Pozo JL, Riera M, Rodriguez D, Sánchez-Somolinos M, Soriano A, Del Toro MD, De la Torre B, on behalf of the Spanish Network for the Study of Infectious Diseases and the Sociedad Española de Enfermedades Infecciosas Microbiología Clínica (SEIMC) along with expert orthopedic surgeons from the Spanish Group of

Septic Pathology of the Locomotive System (GEPSAL). *Enfermedades Infecciosas y Microbiología Clínica* 2017; 35:189-195.

9. Stengel D, Bauwens K, Sehoul J, Ekkernkamp A, Porzsolt F. Systematic review and meta-analysis of antibiotic therapy for bone and joint infections. *Lancet Infect Dis* 2001; 1: 175–88.

10. CJ Mathews, VC. Weston, A. Jones, *et al* G. Bacterial septic arthritis in adults. *Lancet* 2010; 375:846-55

11. B Almirante. Clinical experience with daptomycin use in Spain. Global findings from EU-CORE database. *Med Clin (Barc)* 2010; 135 Suppl 3:23-8.

12. Joseph A. Paladino, and Donald Poretz. Outpatient Parenteral Antimicrobial Therapy Today. *Clin Infect Dis* 2010;51 (Suppl 2).

13. R. Andrew Seaton, Konstantinos N. Malizos, Pierluigi Viale, Panagiotis Gargalianos-Kakolyris, Teresa Santantonio, Enzo Petrelli, Rashidkhan Pathan, Markus Heep and Ricardo L. Chaves. Daptomycin use in patients with osteomyelitis: a preliminary report from the EU-CORESM database. *J Antimicrob Chemother* 2013; 68: 1642–1649.

14. Lalani T. Overview of osteomyelitis in adults and Septic arthritis in adults. UpToDate. Disponible en: [https://www.uptodate.com/contents/overview-of-osteomyelitis-in-adults?source=search\\_result&search=Overview%20of%20osteomyelitis%20in%20adults%20and%20Septic%20arthritis%20in%20adults&selectedTitle=1~150](https://www.uptodate.com/contents/overview-of-osteomyelitis-in-adults?source=search_result&search=Overview%20of%20osteomyelitis%20in%20adults%20and%20Septic%20arthritis%20in%20adults&selectedTitle=1~150).

Última consulta: 20 Abril 2017.

15. Zimmerli W, Trampuz A, Ochsner PE. Prosthetic-joint infections. *N Engl J Med* 2004; 351:1645–54.

16. Esposito S, Leone S, Noviello S, Ianniello F, Fiore M, Russo M, *et al*. Outpatient parenteral antibiotic therapy for bone and joint infections: an Italian multicenter study. *J Chemother* 2007; 19:417–22.

17. Lalani T, Boucher HW, Cosgrove SE, Fowler VG, Kanafani ZA, Vigi iani GA, *et al*. Outcomes with daptomycin versus standard therapy for osteoarticular infections associated with *Staphylococcus aureus* bacteraemia. *J Antimicrob Chemother* 2008; 61:177–82;

18. DR Osmon, EF Berbari, AR Berendt, *et al*. Diagnosis and management of prosthetic joint infection: clinical practice guidelines by the Infectious Diseases Society of America. *Clin Infect Dis* 2013; 56:e

19. Spellberg B, Lipsky BA. Systemic antibiotic therapy for chronic osteomyelitis in adults. *Clin Infect Dis* 2012; 54: 393e407.

20. JA. Crompton, DS. North, SA. McConnell, KC Lamp. Safety and efficacy of daptomycin in the treatment of osteomyelitis: results from the CORE Registry. *J Chemother* 2009; 21:414-21.

## 8-G INFECCIONES DEL SISTEMA NERVIOSO CENTRAL

**Autor: Miguel Ángel Goenaga Sánchez. OSI Donostialdea**

### INTRODUCCIÓN

La administración de tratamientos antimicrobianos domiciliarios endovenosos (TADE) se lleva a cabo desde el inicio de los setenta del siglo pasado<sup>1</sup>. En nuestro país existe una dilatada experiencia con miles de pacientes tratados fundamentalmente a cargo de Unidades de Hospitalización a Domicilio<sup>2,3</sup>. Es sabido que casi cualquier infección puede ser tratada, total o parcialmente, con antibióticos parenterales en el domicilio del paciente, pero también es conocido que la mayoría de los datos de los que disponemos se centran en infecciones del tracto respiratorio y de piel y tejidos blandos. En el caso de las infecciones del sistema nervioso (ISNC), la situación es algo diferente, con menos experiencia y en consecuencia con menos publicaciones al respecto, debido a la mayor complejidad de éstas y que sus complicaciones presentan un manejo de mayor complejidad, siendo potencialmente graves en algunas ocasiones.

Las ISNC comprenden varias entidades diferentes como son las meningitis, encefalitis, meningoencefalitis, abscesos cerebrales o espinales, así como las infecciones asociadas a derivaciones del líquido cefalorraquídeo (LCR). Todas ellas son consideradas infecciones graves, tanto por la naturaleza del tejido donde asientan como por sus posibles complicaciones y morbilidad asociada.

De forma global, el manejo clínico de las ISNC presenta una serie de particularidades, entre las que se encuentran:

1. El inicio del tratamiento no se debe diferir, tratándose en algunos casos, como las meningitis meningocócicas, de auténticas urgencias vitales.
2. La vía de administración del tratamiento ha de ser casi siempre endovenosa.
3. Los antibióticos han de usarse a dosis elevadas y han de presentar buena penetración en tejido cerebral y en el LCR.
4. Se ha de realizar una vigilancia estrecha de las posibles complicaciones, que en algunos casos pueden requerir cirugía, incluso urgente.
5. Hay que valorar la necesidad de tratamientos adyuvantes, como el uso de corticoides o anticomieles, en determinados casos.

Por todo ello, en la práctica habitual los pacientes que presentan este tipo de infecciones deben ingresar en el hospital, tanto para el diagnóstico como para el tratamiento inicial, requiriendo incluso de unidades de cuidados intensivos para su tratamiento y control. La gravedad de las ISNC va a depender de factores como el estado general del paciente, la localización del proceso infeccioso, su

mecanismo de producción, la presencia de cuerpos extraños (derivaciones), y la virulencia del agente etiológico. Estos factores condicionan la elección de los antimicrobianos administrados y la duración del tratamiento. Así un tratamiento puede durar desde 7 días, como en el caso de algunas meningitis, hasta meses en determinados abscesos o infecciones asociadas a derivaciones de LCR. Durante los primeros días de tratamiento, la evolución del proceso infeccioso es más impredecible y existe un mayor riesgo de complicaciones graves; por ello en esta etapa se requiere un control más exhaustivo. Los pacientes que superan este período y presentan una mejoría en sus funciones neurológicas no suelen presentar nuevas complicaciones, ni recaídas, si se mantiene el tratamiento correcto. Por todo ello, y a semejanza de otras infecciones, existe un grupo de pacientes que va a requerir tratamientos antibióticos parenterales prolongados y que, tras su administración inicial en el hospital y tras obtenerse la estabilidad clínica, presentando baja probabilidad de complicaciones, pueden ser seguidos y tratados en el domicilio.

Como se ha comentado previamente, existe escasa bibliografía acerca del tratamiento de ISNC en régimen de TADE. A finales de la pasada centuria se publicaron experiencias de tratamientos en niños con meningitis en el ambiente extrahospitalario<sup>4,5</sup>. Sin duda el trabajo más conocido y citado es publicado por Tice *et al.*<sup>6</sup> quienes revisaron a 68 pacientes que recibieron tratamientos antimicrobianos parenterales extra hospitalarios en el período comprendido entre 1986-1997. Dichos pacientes fueron tratados por meningitis (29 casos), abscesos cerebrales (19 casos), infecciones asociadas a derivaciones del LCR (6 casos), encefalitis (5 casos), abscesos epidurales (5 casos), entre otros. La duración de los tratamientos osciló entre 2 y 89 días (media 18 días). Sólo 5 pacientes no habían tenido período previo de hospitalización y la duración de la hospitalización tradicional del resto de los casos fue igual a 9,5 días de media. El agente etiológico más frecuente fue el *S. pneumoniae* y el antibiótico más utilizado ceftriaxona. Los pacientes fueron seleccionados cuidadosamente y evaluados al menos dos veces por semana. Todas las infecciones curaron, sin ocurrir fallecimientos o complicaciones muy graves. A destacar que dos pacientes presentaron crisis (1 con un absceso y otro con meningitis) y que el 16% de los pacientes requirieron hospitalización tras iniciar el TADE, aunque por razones no relacionadas directamente con el mismo. Debido a estas complicaciones, los autores plantean la posibilidad de tratamiento anticomial preventivo en casos seleccionados, así como la necesidad de informar de esta posibilidad a pacientes y cuidadores. Además de esta publicación monográfica existen series de casos, más o menos amplias, difundidas por los grupos de estudio con experiencia en TADE y comunicados en congresos nacionales e internacionales, siendo un buen ejemplo de ello el presentado por Cuende *et al.*<sup>7</sup> en el IX Congreso de HAD con su experiencia con 22 pacientes. De éstos se puede extrapolar que el tratamiento de estas infecciones supone algo menos 5% del total de los tratamientos antibióticos parenterales en domicilio.

## REQUISITOS PARA TRATAR CON SEGURIDAD Y EFICACIA LAS ISNC EN TADE:

En su estudio Tice *et al.*<sup>6</sup> se enumeran una serie de condiciones que deberían cumplir los candidatos a completar su tratamiento antibiótico en régimen de TADE, que coinciden con las expuestas en el capítulo 2 de este documento.

### ¿Con qué experiencias internacionales o nacionales contamos?

A nivel internacional, a finales de la pasada centuria, se publicaron algunas experiencias de tratamientos en niños con meningitis en el ambiente extrahospitalario<sup>4,5</sup>

Pero sin duda el trabajo más conocido y citado es el de Tice<sup>6</sup> y colaboradores quienes revisaron a 68 pacientes que recibieron tratamientos antimicrobianos parenterales extra hospitalarios en el período comprendido entre 1986-1997. Dichos pacientes fueron tratados por meningitis (29 casos), abscesos cerebrales (19 casos), infecciones de derivaciones del LCR (6 casos), encefalitis (5 casos), abscesos epidurales (5 casos), y con un caso neurosífilis, absceso intraespinal, absceso subdural y hematoma infectado. La duración de los tratamientos osciló entre 2 y 89 días (media 18 días, mediana 17 días). Sólo 5 pacientes no habían tenido período previo de hospitalización y la duración de la hospitalización tradicional del resto de los casos fue de 9,5 días de media. El agente etiológico más frecuente fue el *S. pneumoniae* y el antibiótico más utilizado ceftriaxona. Los pacientes fueron seleccionados cuidadosamente y evaluados al menos dos veces por semana. Todas las infecciones curaron, sin ocurrir fallecimientos o complicaciones muy graves. A destacar que dos pacientes presentaron crisis (1 con un absceso y otro con meningitis) y que el 16% de los pacientes requirieron hospitalización tras iniciar el TADE, aunque por razones no relacionadas con estar en tratamiento fuera del hospital.

Recientemente el grupo de Hensey<sup>7</sup> ha publicado su experiencia en el tratamiento de meningitis en 29 niños. Tras una mediana de 6 días de tratamiento intrahospitalario y al menos 4 días estando afebriles, fueron tratados en régimen TADE una mediana de 9 días. Los autores concluyen que niños con meningitis pueden ser tratados fuera del hospital y que la decisión del lugar de tratamiento y el momento del mismo van a depender de la edad, la duración del tratamiento y la presencia de fiebre.

A nivel nacional, existen experiencias publicadas, dentro de las series generales de los centros, en este tipo de tratamientos, existiendo alguna comunicación monográfica con tratamientos con este tipo de infecciones<sup>2,3,8</sup>.

**¿Es suficiente?:** Contestar esta pregunta es complejo, pero parece que, si se tienen los recursos adecuados y un equipo con experiencia en este tipo de

tratamientos en domicilio, estas infecciones pueden ser tratadas con seguridad con antibióticos parenterales en el domicilio

**¿Cuáles son las infecciones, dentro de las ISNC, más frecuentemente tratadas, según las series?:** Dentro de las ISNC existe experiencia en el tratamiento de meningitis, encefalitis, meningoencefalitis, abscesos cerebrales o espinales, o las infecciones de las derivaciones del líquido cefalorraquídeo(LCR).

**¿Requieren estos tratamientos algún cuidado especial?:**En el trabajo de Tice *et al.*<sup>6</sup>, dos pacientes presentaron crisis (1 con un absceso y otro con meningitis) y el 16% de los pacientes requirieron hospitalización tras iniciar el TADE, aunque por razones no relacionadas con estar en tratamiento fuera del hospital.

Debido a estas complicaciones los autores plantean la posibilidad de tratamiento anticomitial preventivo en casos seleccionados, así como de informar de esta posibilidad a pacientes y cuidadores.

## CONCLUSIONES

Basándonos en los datos existentes, y teniendo en cuenta sus limitaciones, podemos afirmar que, si se sigue un proceso correcto de selección de paciente, se conocen las complicaciones propias<sup>9</sup> (crisis comiciales), y se dispone de los medios y recursos pertinentes, éstas pueden ser tratadas con seguridad en los domicilios (C-III). De esta forma, procesos como ciertas meningitis, meningoencefalitis herpéticas o abscesos cerebrales pueden finalizar el tratamiento en régimen de TADE sin añadir un mayor número de complicaciones que las de la hospitalización convencional, con un buen resultado clínico.

## RECOMENDACIONES FINALES

- Las infecciones del SNC pueden ser tratadas con seguridad en el domicilio del paciente, de manera que ciertas meningitis, meningoencefalitis herpéticas o abscesos cerebrales pueden finalizar el tratamiento mediante TADE sin añadir un mayor número de complicaciones que las de la hospitalización convencional con un buen resultado clínico (C-III).
- Las pautas de tratamiento antimicrobiano de las infecciones del SNC así como su duración en régimen de TADE deben ser las mismas que para los pacientes en hospitalización convencional (C-III)



## BIBLIOGRAFÍA

1. Tice AD. Outpatient parenteral antimicrobial Therapy. En: Mandell, Douglas, and Bennett's Principles and practice of infectious diseases. Philadelphia: Churchill Livingstone Elsevier, 2010;699-703.
2. Horcajada JP, García L, Benito N, Cervera C, Sala M, Olivera A *et al*. Hospitalización a domicilio especializada en enfermedades infecciosas. Experiencias de 1995 a 2002. *Enferm Infecc Microbiol Clin* 2007; 25:429-36.
3. Cuende A, Goienetxe M, Elizegi E, Basterretxea A, García M *et al*. Registro vasco de antibioterapia parenteral 2009-2010. XV Congreso de la Sociedad Española de Enfermedades Infecciosas y Microbiología Clínica (SEIMC). Málaga, 1-4 junio 2011; 681.
4. Powell KR, Mawhorter SD. Outpatient treatment of serious infections in infants and children with ceftriaxone. *J Pediatr* 1987; 110:898-901.
5. Waler JA, Rathore MH. Outpatient management of pediatric bacterial meningitis. *Pediatr Infect Dis* 1995; 14:89-92.
6. Tice AD, Strait K, Ramey R, Hoaglund P. Outpatient parenteral antimicrobial therapy for central nervous system infectious. *Clin Infect Dis* 1999; 29:1394-9.
7. Hensey CC, Sett A, Connell TG, Bryant PA. A Comparison of Hospital Versus Outpatient Parenteral Antibiotic Therapy at Home for Pyelonephritis and Meningitis. *Pediatr Infect Dis J* 2017; 36(9):827-832.
8. Cuende A, Goienetxe M, Linazisoro A, Arzelun E, Carrera JA *et al*. Infecciones de SNC: Tratamiento antimicrobiano parenteral en domicilio. En: Libro Abstracts de IX Congreso Nacional de HAD. San Sebastián 2008; Mesa 1 Código 004.
9. Porezt DM. Direct involvement of physicians is vital to outpatient parenteral therapy for central nervous system infections. *Clin Infect Dis* 1999; 29:1400-01.

## 8.H. NEUTROPENIA FEBRIL

**Autor:** Pedro Sanroma Mendizábal. **Hospital** Marqués de Valdecilla. Santander

## INTRODUCCIÓN

La neutropenia inducida por quimioterapia es una complicación frecuente en pacientes onco-hematológicos. Con anterioridad a la utilización de antibioterapia empírica las infecciones representaban el 70 % de la mortalidad en pacientes con leucemia aguda y neutropenia<sup>1</sup>. Las guías de consenso recomiendan la evaluación precoz de todos los pacientes con neutropenia, y

enfatan en la importancia del inicio temprano del tratamiento empírico con antibióticos de amplio espectro<sup>2</sup>, con lo que se consigue mejorar el pronóstico<sup>3</sup>. El riesgo de complicaciones infecciosas aumenta con las neutropenias severas de más de 7 días de duración, siendo muy importante evaluar el riesgo de complicaciones en un paciente con neutropenia febril, para ello la herramienta pronóstica más validada es la escala del *Multinational Association of supportive care in cáncer* (MASCC)<sup>4</sup>.

Clásicamente se ha recomendado el tratamiento ambulatorio por vía oral para pacientes de bajo riesgo, y el tratamiento endovenoso intrahospitalario para pacientes de alto riesgo, sin embargo son múltiples las experiencias que demuestran la viabilidad de realizar el seguimiento clínico de la neutropenia fuera del hospital de forma segura y coste/efectiva, tanto después de quimioterapia de leucemia aguda mieloblástica<sup>5</sup>, incluso en pacientes ancianos<sup>6</sup>, como después del trasplante de progenitores hematopoyéticos, autólogo<sup>7,9</sup> o alogénico<sup>8</sup> y algunos países han formulado recomendaciones de consenso<sup>9</sup>.

Aunque existen numerosas guías dirigidas al abordaje y tratamiento de pacientes con neutropenias de moderado-alto riesgo, no es así en el caso del abordaje y tratamiento de estos pacientes en su domicilio.

En este documento se revisa la información existente sobre el manejo de la neutropenia de moderado-alto riesgo, y más concretamente en el manejo ambulatorio de la misma, realizándose una serie de recomendaciones, basadas en la mejor evidencia disponible, sobre criterios de inclusión en programas de HAD de estos pacientes, criterios de reingreso hospitalario, aspectos generales de la infección, medidas higiénico medio ambientales para su manejo domiciliario, determinación de pruebas complementarias necesarias, aspectos relacionados con la infección asociada a catéter, la utilización de Factor estimulante de crecimiento de colonias de granulocitos, profilaxis antimicrobiana, pautas de antibioterapia empírica, así como pautas indicadas en casos de infección por microorganismos multiresistentes, para terminar con un resumen de recomendaciones generales.

## DEFINICIONES

- Neutropenia: Hay diferentes definiciones de neutropenia, nos referimos a Neutropenia severa si el número de neutrófilos es <500 células/mcl.
- Neutropenia profunda: si son <100 células/mcl.
- Neutropenia de bajo riesgo: Pacientes con un recuento absoluto de neutrófilos < 500 cells/microL durante ≤ 7 días, y aquellos sin comorbilidades ni evidencia de disfunción significativa de hígado o riñón<sup>2</sup>.

- Neutropenia de moderado-alto riesgo: Pacientes con un recuento absoluto de neutrófilos  $<100/\mu\text{L}$  durante  $> 7$  días.<sup>2, 10, 11</sup>, o con comorbilidades y/o evidencia de disfunción hepática o renal significativa, independientemente de la duración de la neutropenia.
- Fiebre neutropénica persistente es aquella que se mantiene al menos cinco días tras haberse iniciado tratamiento antibacteriano empírico de amplio espectro<sup>2</sup>.
- Fiebre recrudescente es un episodio febril que se repite después de la defervescencia inicial durante un curso de terapia antibacteriana de amplio espectro<sup>2</sup>.

---

#### **CRITERIOS DE SELECCIÓN DE PACIENTES CON NEUTROPENIA DE MODERADO-ALTO RIESGO PARA INCLUSIÓN EN PROGRAMA DE SEGUIMIENTO DOMICILIARIO<sup>11</sup>**

- Lugar de residencia a una distancia abarcable del hospital en función de las características del programa TADE disponible.
- Aceptación del oncólogo o hematólogo responsable del seguimiento del paciente para inclusión en el programa.
- Capacidad de cumplimiento con los requisitos logísticos, incluyendo frecuentes visitas de equipo médico y de enfermería.
- Presencia de familiar o cuidador durante 24 horas diarias.
- Acceso a teléfono y medios de transporte 24 horas al día.
- No antecedentes de incumplimiento terapéutico

#### **CRITERIOS DE REINGRESO HOSPITALARIO<sup>9</sup>**

- Pacientes con inestabilidad hemodinámica o con necesidad de monitorización o de frecuentes controles de tensión arterial, saturación de oxígeno o constantes vitales.
- Mal cumplimiento terapéutico y de seguimiento de normas.

#### **ASPECTOS GENERALES DE LAS INFECCIONES EN PACIENTES CON NEUTROPENIA DE MODERADO-ALTO RIESGO**

- Una infección grave puede ocurrir con mínimos síntomas y signos. La fiebre puede ser el signo más temprano y único de la infección. Es crítico el reconocimiento temprano de la fiebre neutropénica y el inicio del tratamiento antibacteriano empírico inmediatamente después de que se hayan obtenido los hemocultivos y antes de que se hayan completado otras investigaciones<sup>17</sup>, pues pueden progresar rápidamente dando lugar a hipotensión u otras complicaciones potencialmente mortales<sup>12</sup>. Las directrices internacionales abogan por la administración de la terapia antibacteriana empírica dentro de los 60 minutos de presentación en todos los pacientes que presentan una fiebre neutropénica<sup>11</sup>.
- La presencia de signos de síndrome de respuesta inflamatoria sistémica (SIRS), incluyendo taquicardia, taquipnea, o hipotensión en un paciente neutropénico afebril que está recibiendo glucocorticoides concomitantes, debe elevar la sospecha de infección<sup>2</sup>.
- Aproximadamente el 80% de las infecciones identificadas se cree que surgen de la flora endógena del paciente<sup>2</sup>. Las bacterias grampositivas son las causas más frecuentemente documentadas, pero las bacterias gramnegativas se asocian generalmente con las infecciones más graves.
- La mucositis inducida por quimioterapia afecta a todo el tubo digestivo, el paso al torrente sanguíneo de la flora endógena de la boca y el tracto gastrointestinal causa la mayoría de los episodios de fiebre neutropénica. El 80% de las infecciones tienen origen en la flora endógena, favorecidas por la rotura de barreras<sup>2</sup>.
- La proporción de bacterias grampositivas respecto a bacterias gramnegativas como la causa de la bacteriemia en pacientes con cáncer y neutropenia se mantiene en aproximadamente 60:40<sup>13</sup>.
- Aunque las bacterias anaerobias son abundantes en el tracto alimentario, son patógenos infrecuentes en pacientes con fiebre neutropénica<sup>13</sup>.
- Las infecciones polimicrobianas son infrecuentes, pero su frecuencia parece estar aumentando<sup>14</sup>.
- El riesgo de infecciones fúngicas invasivas aumenta con la duración y la gravedad de la neutropenia, el uso prolongado de antibióticos y el número de ciclos de quimioterapia. Los hongos raramente son la causa del primer episodio febril en pacientes neutropénicos. Más comúnmente, las infecciones por hongos invasivas se producen posteriormente como una causa de fiebre neutropénica persistente o recurrente<sup>15</sup>.
- Las infecciones virales, especialmente por herpes virus humano, son comunes en pacientes de alto riesgo con neutropenia inducida por quimioterapia y se previenen eficazmente con profilaxis antiviral.

- La mayoría de infecciones por herpes virus 1 y 2 se deben a reactivación de infecciones latentes en pacientes seropositivos. Las infecciones por otros herpes virus (Citomegalovirus, Epstein Barr virus, herpes virus 6) se dan sobre todo en receptores de trasplante alogénico de médula ósea.
- Una vez iniciado el tratamiento antibiótico empírico, este deberá mantenerse por lo menos hasta la recuperación de neutrófilos por encima de 500 células/mm<sup>3</sup>.<sup>2</sup>
- En pacientes con fiebre inexplicable se recomienda que el régimen inicial se continúe hasta la recuperación de neutrófilos > 500 células / mm<sup>3</sup>.<sup>2</sup>
- Una fiebre persistente inexplicable con el paciente clínicamente estable, raramente requiere cambios en la pauta antibiótica.<sup>2</sup>

## **MEDIDAS HIGIÉNICAS Y MEDIOAMBIENTALES PARA EL MANEJO DOMICILIARIO**

- La higiene de manos es la forma más efectiva de prevenir la transmisión de la infección.<sup>11</sup>
- No se requiere ningún equipo de protección específico (por ejemplo, batas, guantes y máscaras) durante el cuidado de rutina de los pacientes neutropénicos. Sin embargo, cuando se prevé el contacto con fluidos corporales, se deben seguir las precauciones estándar de barrera.<sup>11</sup>
- Los pacientes con neutropenia, que no sean receptores de HSCT (*hematopoietic stem-cell transplantation*), no necesitan estar aislados en una habitación. Deben adoptarse medidas standard de barrera en todos los pacientes<sup>11</sup>.
- No deben permitirse plantas y flores secas o frescas en la habitación del paciente.<sup>19</sup>
- Deberán tomarse alimentos bien cocinados, evitando comidas preparadas. Se ha visto que evitando frutas y hortalizas crudas no se disminuyó la tasa de infección o muerte.<sup>15</sup>
- Debe evitarse el contacto del paciente con otras personas con infecciones transmisibles por aire, gotitas y contacto directo, debiendo utilizarse protección con máscara y guante si el contacto es inevitable.<sup>2</sup>
- Salvo casos muy excepcionales, la mayoría de los pacientes con neutropenia no requieren ventilación específica en la habitación.<sup>19</sup>
- Los pacientes deben ducharse diariamente, inspeccionando la piel a fin de detectar cualquier signo orientativo de infección, especialmente inserciones vasculares y periné.<sup>19</sup>
- Durante la menstruación no se permitirá el uso de tampones.<sup>19</sup>
- Los termómetros rectales, enemas, supositorios y exámenes rectales están contraindicados.<sup>19</sup>

- Los pacientes con mucositis deberán realizar enjuagues bucales 4-6 veces al día con agua estéril, solución salina normal o soluciones de bicarbonato de sodio. Los pacientes deben cepillarse los dientes  $\geq 2$  veces al día con un cepillo de dientes suave y regular.<sup>11</sup>
- Deberán evitarse órtesis dentarias durante la neutropenia.<sup>2</sup>
- Debe evitarse el contacto con mascotas domésticas.<sup>2</sup>

## **RECOMENDACIONES GENERALES PARA SEGUIMIENTO DOMICILIARIO EN PACIENTES CON NEUTROPENIA DE MODERADO-ALTO RIESGO**

- **EVALUACIÓN CLÍNICA ANTE APARICIÓN DE EPISODIO FEBRIL**

El interrogatorio y la exploración clínica deben dirigirse a buscar focos de infección: cavidad oral, pulmón, periné, piel, entrada y túnel de catéteres centrales y tracto gastrointestinal. En pacientes con neutropenia severa y fiebre se debe iniciar tratamiento empírico urgente con antibióticos de acuerdo con el perfil epidemiológico y de sensibilidad antimicrobiana de cada centro.<sup>2</sup>

- **EXAMENES COMPLEMENTARIOS ANTE EPISODIO FEBRIL**

- Al inicio de la fiebre deberá determinarse hemograma completo con recuento de leucocitos, plaquetas, niveles séricos de creatinina, nitrógeno ureico, electrolitos, transaminasas y bilirrubina total.<sup>2</sup>
- Al menos 2 tandas de hemocultivos con una muestra extraída simultáneamente de cada luz de catéter venoso central, o de vía periférica. Si no hay catéter central se tomarán muestras de dos diferentes venopunciones.<sup>2</sup>
- Deberán tomarse muestras para cultivo de cualquier lugar con sospecha de infección<sup>2</sup>.
- Urocultivo.<sup>2</sup>
- Coprocultivo y toxina *Clostridium difficile* si existe diarrea.<sup>2</sup>
- Se realizará una radiografía de tórax en pacientes con signos o síntomas respiratorios.<sup>2</sup>

- **SEGUIMIENTO POSTERIOR DEL PACIENTE ESTABLE DURANTE PERIODO DE NEUTROPENIA**

- Evaluación diaria con revisión de síntomas y exploración física<sup>20</sup>.
- Hemograma y bioquímica (glucosa, urea, electrolitos, creatinina, bilirrubina total y enzimas hepáticos). El hemograma, la función

renal y electrolitos se repetirán diariamente, las pruebas hepáticas semanalmente<sup>20</sup>.

- Antígeno galactomanano semanal<sup>20</sup>.

## UTILIZACIÓN DE FACTOR ESTIMULADOR DE CRECIMIENTO DE NEUTRÓFILOS

GCSF (Filgrastim®): Se utilizará cuando la probabilidad de fiebre durante la neutropenia es superior al 20%. Dosis: 5 mcg/kg/día, vía subcutánea, desde 24 a 72 horas tras la última dosis de quimioterapia, hasta la recuperación de neutrófilos.<sup>17</sup>

## TRATAMIENTO ANTIBIÓTICO

Las pautas de tratamiento antimicrobiano en la neutropenia febril, así como su duración en régimen de TADE deben ser las mismas que para los pacientes en hospitalización convencional.

La experiencia de los programas TADE en neutropenia febril ha ido aumentando en los últimos años, demostrando su eficacia, su seguridad y mejorando la calidad de vida del paciente.<sup>21</sup> Por otro lado, el TADE también se ha mostrado eficiente en el tratamiento ambulatorio de la neutropenia febril de bajo riesgo. Hendricks *et al.* evidenciaron en un estudio aleatorizado que los pacientes que recibían TADE tenían un coste medio total un 49% inferior al de los pacientes hospitalizados, y además con unos resultados de eficacia clínica y seguridad similares.<sup>22</sup>

Como tratamientos antibióticos ambulatorios, en un estudio publicado por Egerer *et al.*<sup>23</sup> se evidenció que la infusión de ceftazidima durante 24 horas en bomba de perfusión portátil en pacientes con neutropenia febril tras altas dosis de quimioterapia y posterior trasplante periférico de células madre fue efectiva y segura.

Un estudio aleatorizado en pacientes oncológicos pediátricos con neutropenia febril de bajo riesgo demostró que el TADE con cefepime era efectivo y seguro en comparación con el grupo de pacientes ingresados en HC. Los baremos estudiados de calidad de vida fueron claramente superiores en el grupo de pacientes sometido a TADE.<sup>24</sup>

## RECOMENDACIONES FINALES

- El TADE en pacientes neutropénicos es efectivo, seguro y eficiente, incluso en pacientes pediátricos. (B-III)
- El TADE en pacientes con neutropenia febril mejora los parámetros de calidad de vida con respecto a los pacientes ingresados en hospitalización convencional. (B-II).
- Las pautas de tratamiento antimicrobiano en la neutropenia febril, así como su duración en régimen de TADE deben ser las mismas que para los pacientes en hospitalización convencional. (C-III)

## BIBLIOGRAFÍA

1. Hersh EM, Bodey GP, Nies BA, Freireich EJ. Causes of death in acute leukemia: a ten-year study of 414 patients from 1954-1963. *JAMA* 1965; 193:105-9.
2. Freifeld AG, Bow EJ, Sepkowitz KA, *et al.* Clinical practice guideline for the use of antimicrobial agents in neutropenic patients with cancer: 2010 update by the infectious diseases society of America. *Clin Infect Dis* 2011; 52(4):e56-e93.
3. Zuckermann J, Moreira LB, Stoll P, *et al.* Compliance with a critical pathway for the management of febrile neutropenia and impact on clinical outcomes. *Ann Hematol* 2008; 87(2):139-45.
4. Klastersy J, Paesmans M, Georgala A, Muanza F, Plehiers B, Dubreucq L *et al.* Outpatient oral antibiotics for febrile neutropenic cancer patients using a score predictive for complications. *J Clin Oncol* 2006; 24(25). 4129-34.
5. Møller T, Nielsen OJ, Welinder P, *et al.* Safe and feasible outpatient treatment following induction and consolidation chemotherapy for patients with acute leukaemia. *Eur J Haematol* 2010; 84(4):316-22.
6. Bermúdez A, Pérez-Vázquez G, Insunza A, *et al.* FLAGIDA-lite is an effective regimen for patients between 70 and 80 years with acute myeloid leukemia or refractory anemia with excess blasts-2 and is feasible as outpatient treatment. *Am J Hematol* 2012; 87(1):42-4.
7. Martínez-Cibrian N, Magnano L, Gutiérrez-García G, *et al.* At home autologous stem cell transplantation in multiple myeloma with and without G-CSF administration: a comparative study. *Bone Marrow Transplant* 2016; 51(4):593-5.
8. Bergkvist K, Larsen J, Johansson UB, *et al.* Hospital care or home care after allogeneic hematopoietic stem cell transplantation patients' experiences of care and support. *Eur J Oncol Nurs* 2013;17(4):389-95.



9. Martino M, Lemoli RM, Girmenia C, *et al.* Italian consensus conference for the outpatient autologous stem cell transplantation management in multiple myeloma. *Bone Marrow Transplant* 2016;51(8):1032-40.
10. Baden LR, Swaminathan S, Angarone M, Blouin G, Camins BC, Casper C, *et al.* Prevention and Treatment of Cancer-Related Infections, Version 2.2016, NCCN Clinical Practice Guidelines in Oncology. *J Natl Compr Canc Netw* 2016;14(7):882-913.
11. Flowers CR, Seidenfeld J, Bow EJ, *et al.* Antimicrobial prophylaxis and outpatient management of fever and neutropenia in adults treated for malignancy: American Society of Clinical Oncology clinical practice guideline. *J Clin Oncol* 2013;31(6):794-810.
12. Sickles EA, Greene WH, Wiernik PH. Clinical presentation of infection in granulocytopenic patients. *Arch Intern Med* 1975; 135(5):715-9.
13. **Gudiol C, Bodro M, Simonetti A, *et al.* Changing aetiology, clinical features, antimicrobial resistance, and outcomes of bloodstream infection in neutropenic cancer patients. *Clin Microbiol Infect* 2013; 19(5):474-479.**
14. Pagano L, Caira M, Nosari A, *et al.* Etiology of febrile episodes in patients with acute myeloid leukemia: results from the Hema e-Chart Registry. *Arch Intern Med* 2011; 171(16):1502-3.
15. Gardner A, Mattiuzzi G, Faderl S, *et al.* Randomized comparison of cooked and noncooked diets in patients undergoing remission induction therapy for acute myeloid leukemia. *J Clin Oncol* 2008; 26(35):5684-8.
16. Bell MS, Scullen P, McParlan D, *et al.* Neutropenic sepsis guidelines. Northern Ireland Cancer Network, Belfast 2010. p. 1-11.
17. Ozer H, Armitage JO, Bennett CL, *et al.* 2000 update of recommendations for the use of hematopoietic colony-stimulating factors: evidence-based, clinical practice guidelines. American Society of Clinical Oncology Growth Factors Expert Panel. *J Clin Oncol* 2000; 18(20):3558-85.
18. Siegel JD, Rhinehart E, Jackson M, *et al.* 2007 Guideline for isolation precautions: preventing transmission of infectious agents in health care settings. *Am J Infect Control* 2007; 35:S65-164.
19. Guidelines for preventing opportunistic infections among hematopoietic stem cell transplant recipients, MMWR Recomm Rep, 2000, vol. 49:1-125.

20. De Naurois J, Novitzky-Basso I, Gil MJ, Marti Marti F, Cullen MH, Roila F. Management of febrile neutropenia: ESMO Clinical Practice Guidelines. *Ann Oncol* 2010; 21 (Suppl 5): v252-v256.
21. Tice AD. Outpatient parenteral antibiotic therapy for fever and neutropenia. *Infect Dis Clin North Am* 1998; 12(4):963-977
22. Hendricks AM, Trice E, Talcott JA. Costs of home versus inpatient treatment for fever and neutropenia: analysis of a multicenter randomized trial. *J Clin Oncol* 2011; 29:3984-3989.
23. Egerer G, Goldschmidt H, Salwender H *et al.* Efficacy of continuous infusion of ceftazidime for patients with neutropenic fever after high-dose chemotherapy and peripheral blood stem cell transplantation. *Int J Antimicrob Agents* 2000;15:119-123.
24. Orme LM, Babl FE, Barnes C *et al.* Outpatient versus inpatient IV antibiotic management for pediatric oncology patients with low risk febrile neutropenia: a randomized trial. *Pediatr Blood Cancer* 2014; 61(8):1427-33.

## **8-I. INFECCIONES POR BACTERIAS MULTIRRESISTENTES**

**Autores: Elena Delgado Mejía. Hospital Son Espases. Palma de Mallorca**

**Manuel del Río Vizoso. Hospital Son Espases. Palma de Mallorca.**

### **INTRODUCCIÓN**

La mayoría de la bibliografía existente acerca de la eficacia y seguridad del TADE hace referencia a infecciones por microorganismos sensibles, siendo la evidencia menor para microorganismos con resistencia antibiótica.

Los pacientes con infecciones producidas por una bacteria multirresistente (MMRR) suelen tener mayor comorbilidad y dependencia física, representando un grupo con importante impacto sanitario y económico debido a la alta frecuencia de ingresos hospitalarios y a la utilización de antibióticos. Además, en muchos casos estos pacientes deben permanecer en habitaciones individuales, dificultando la gestión de ubicación de pacientes en el área hospitalaria<sup>1</sup>.

Por todo ello, resulta muy interesante la administración del tratamiento antibiótico en el mismo domicilio de los pacientes, suponiendo una alternativa eficaz y segura, con una elevada satisfacción del paciente y un ahorro significativo en costes<sup>2,3</sup>.

Gran parte de los datos publicados provienen de subpoblaciones de estudios más generales; no obstante, todos ellos muestran alta seguridad y eficacia, elevada satisfacción del paciente y ahorro significativo en costes en la administración domiciliaria.

## DEFINICION

Se define bacteria MR a aquella que presenta resistencia a, al menos, un agente de tres o más categorías de antimicrobianos diferentes<sup>4</sup>. Los microorganismos que tienen mayor susceptibilidad para presentar multirresistencia son *Staphylococcus aureus*, *Enterococcus* spp, *Enterobacteriaceae*, *Pseudomonas aeruginosa* y *Acinetobacter* spp.

Como recomendación general se tendrá en cuenta que las pautas de tratamiento antimicrobiano en las infecciones por bacterias multirresistentes, así como su duración en régimen de TADE deben ser las mismas que para los pacientes en hospitalización convencional. A continuación, se describe la evidencia científica disponible del tratamiento de las infecciones causadas por los microorganismos mencionados en el contexto de resistencia antibiótica, y las posibilidades de realizarlo en régimen de TADE.

## TRATAMIENTO ANTIBIÓTICO

### ***Staphylococcus aureus* resistente a la meticilina (SARM)**

A pesar de que la mayoría de las infecciones nosocomiales están producidas por microorganismos gramnegativos, los grampositivos suponen una amenaza creciente. De este modo, según el "European Centre for Disease Prevention and Control" (ECDC), en España el 25,3% de todas las cepas de *S. aureus* son resistentes a la meticilina.

SARM es el agente causal de una gran variedad de infecciones. Las más frecuentes son las infecciones vasculares, osteoarticulares, respiratorias y las IPPB.

A pesar de que la vancomicina tradicionalmente ha sido considerada el tratamiento de primera línea, actualmente la selección del antimicrobiano se realiza en base al origen de la infección, a los valores de CMI de la vancomicina y, en el caso del tratamiento empírico, a la epidemiología local de los aislados con CMI a la vancomicina  $\geq 1,5$  mg/l<sup>6</sup>. En estos casos el tratamiento de elección sería daptomicina, excepto en neumonía, meningitis y endoftalmitis, en los que sería linezolid, con una biodisponibilidad oral del 100%.

Daptomicina supone una opción idónea para el TADE debido a su posología de administración única diaria, no precisar monitorización de niveles plasmáticos (a

diferencia de la vancomicina) y menor tasa de efectos adversos que la vancomicina en relación a nefrotoxicidad principalmente<sup>7</sup>. Como desventaja presenta un coste más elevado que ésta<sup>8,9</sup>. Las indicaciones aprobadas de daptomicina son celulitis, bacteriemia y endocarditis, siendo importante destacar que no debe utilizarse para el tratamiento de neumonía, ya que daptomicina es inhibida por el surfactante pulmonar.

Recientemente se ha aprobado dalbavancina, un nuevo fármaco endovenoso indicado para IPPB en adultos con excelente actividad frente a cocos grampositivos, incluyendo SARM. Su posología recomendada es de 1500 mg en perfusión única o bien 1000 mg al inicio del tratamiento seguido de 500mg una semana después. Su administración en régimen domiciliario estaría indicada si el paciente requiriese curas o tratamientos adicionales, si no fuese este el caso, podría plantearse un seguimiento ambulatorio del paciente. El tratamiento con dalbavancina estaría indicado en el caso de necesidad de tratamiento prolongado con vancomicina, ya que ofrecería como ventaja su régimen de administración con la reducción asociada de complicaciones secundarias a la terapia parenteral en múltiples dosis, y en caso de pacientes con insuficiencia renal<sup>10</sup>.

Linezolid y tedizolid son alternativas terapéuticas con excelente biodisponibilidad oral. Cabe resaltar que linezolid no está aprobado para el tratamiento de endocarditis por SARM, y tedizolid únicamente está indicado para IPPB. Debido a que son tratamientos orales, la opción de TADE se reservaría para pacientes con dificultad para la absorción intestinal del paciente o aquellos con insuficiencia renal en los que estaría limitada la utilización de vancomicina<sup>11</sup>.

Durante el periodo de tratamiento se deben guardar las medidas habituales de higiene, control y prevención del microorganismo, siendo la higiene de manos la base de las medidas a adoptar en domicilio. El resto de medidas (bata, guantes, mascarilla) vendría determinado por los procedimientos que se vayan a realizar al paciente. No existe riesgo para los acompañantes del paciente a no ser que estén inmunodeprimidos o presenten heridas, úlceras, sondas, drenajes o catéteres<sup>12</sup>.

### **Enterococo vancomicina resistente (EVR)**

Los enterococos forman parte de la microbiota de humanos, de ellos, el *E. faecalis* y *E. faecium* son las especies más abundantes del tracto intestinal. *E. faecalis* es el más frecuente en nuestro medio (80-90%), sin embargo, es importante destacar que en las últimas décadas se ha producido un aumento importante de infecciones por *E. faecium*. Este último hecho conlleva una

importancia añadida, ya que es *E. faecium* el que presenta mayor resistencia antibiótica.

Hoy en día son considerados importantes patógenos nosocomiales debido a su dificultad de tratamiento, condicionado por su multirresistencia intrínseca y a su capacidad para adquirir nuevos genes de resistencia antibiótica. En las últimas décadas se ha observado un aumento en las tasas de resistencia de *E. faecium* a la vancomicina y a la ampicilina, superando el 80% en muchos países europeos, entre ellos España. Este hecho ha promovido la aparición de antibióticos que son útiles como tratamiento alternativo, como lo son linezolid, tedizolid y daptomicina.

Los enterococos se relacionan principalmente con ITU, bacteriemias, endocarditis, infección intraabdominal y de heridas quirúrgicas.

Actualmente la evidencia científica del tratamiento de infecciones por enterococo con resistencias antibióticas es escasa; centrándose la mayoría de ella en el enterococo resistente a la vancomicina (EVR). Daptomicina es una buena alternativa de tratamiento por las razones ya expuestas y, aunque hay evidencia disponible de su administración en domicilio, no la hay como tratamiento específico para enterococo<sup>9</sup>.

Linezolid y tedizolid también tienen actividad frente al enterococo resistente a la vancomicina. Como se ha indicado en el anterior apartado, su utilización en TADE quedaría reservada para pacientes con dificultad en la absorción intestinal<sup>11</sup>.

### **Enterobacterias productoras de betalactamasas de espectro extendido (BLEE)**

La detección de pacientes con riesgo de padecer una infección por una enterobacteria MR es clave, ya que iniciar el tratamiento empírico de forma inapropiada conllevaría un aumento de la morbimortalidad<sup>13</sup>. Para una correcta elección del tratamiento empírico debemos tener en cuenta el tipo de infección, la situación epidemiológica local y los factores individuales del paciente.

A este respecto se realizó un estudio multicéntrico con el objetivo de detectar factores de riesgo individuales para infección por enterobacterias tipo BLEE<sup>18</sup>. Los factores de riesgo para infecciones por enterobacterias tipo BLEE en infecciones comunitarias fueron diferentes de los de las infecciones nosocomiales. Así en infecciones de origen comunitario se hallaron como factores de riesgo: la edad, las IACS, las ITU de repetición, el hecho de ser portador de sonda vesical y el haber llevado antibiótico previo (específicamente fluoroquinolonas y cefalosporinas). En cambio, en las infecciones nosocomiales los factores de riesgo para tener una infección por enterobacteria tipo BLEE fueron la estancia media hospitalaria, los procedimientos invasivos, el uso

previo de antibióticos (principalmente cefalosporinas y fluoroquinolonas) y la existencia de colonización previa por este tipo de germen<sup>14</sup>.

A continuación, se describen los datos reflejados en la literatura acerca del tratamiento para enterobacterias tipo BLEE:

- **Carbapenems:**

Se consideran el tratamiento de elección en infecciones invasivas y su uso como tratamiento empírico ha demostrado ser un factor independiente para disminuir la mortalidad. En el año 2012 se publicó un metaanálisis que comparaba 21 estudios observacionales en el que no hubo diferencias en mortalidad cuando se comparaba carbapenem con un  $\beta$ -lactámico asociado a un inhibidor de  $\beta$ -lactamasas, tanto en el tratamiento empírico como en el dirigido; en cambio, si se describieron diferencias cuando se comparaba con cualquier otro antibiótico que no fuese un betalactámico con inhibidor de  $\beta$ -lactamasas, siendo la mortalidad inferior cuando se utilizaba un carbapenem como tratamiento empírico o dirigido.<sup>15</sup>

Los carbapenems disponibles son meropenem, ertapenem, e imipenem. Todos los carbapenems son similares en cuanto a espectro, aunque con diferencias significativas en la antimicrobiana, ya que ertapenem no tiene actividad frente a *P.aeruginosa* ni a *Acinetobacter* spp. La administración domiciliaria de meropenem e imipenem requeriría de la participación del propio paciente o su cuidador, así como su adiestramiento en el manejo de dispositivos de infusión portátiles dada la inestabilidad de estos antibióticos a temperatura ambiente. Ertapenem, en cambio, tiene la ventaja de ser de administración única diaria<sup>16</sup>.

Un estudio realizado en pacientes con infección urinaria por *E.coli*-BLEE concluye que ertapenem es una buena alternativa de tratamiento, tanto por su efectividad clínica y comodidad en su administración, como por la disminución de camas ocupadas en hospitalización convencional con la reducción de costes que ello supone<sup>16</sup>.

Se han realizado 2 estudios retrospectivos que comparan ertapenem con meropenem e imipenem para tratamiento de bacteriemias por microorganismos productores de BLEE, no encontrándose diferencias estadísticamente significativas en relación a mortalidad<sup>17,18</sup>.

- **Piperacilina-Tazobactam** ( $\beta$ -lactámico asociado a inhibidor de  $\beta$ -lactamasa): escasa y variable experiencia en infección sistémica. Suponen una alternativa terapéutica para pacientes con bacteriemia por *E. coli*-BLEE de foco urinario o biliar cuando las cepas son sensibles in vitro<sup>19</sup>.
- **Cefalosporinas:** no existen datos suficientes para recomendar este tratamiento en infecciones graves, incluso cuando las cepas son sensibles in

vitro<sup>18</sup>. Se ha sugerido que el uso de cefepime en dosis mayores a las habituales podría ser útil en infecciones no graves<sup>20</sup>.

- **Tigeciclina:** aunque no se considera de primera elección, la tigeciclina se considera como alternativa, excepto en ITU por las bajas concentraciones que alcanza en orina<sup>21</sup>.
- **Fosfomicina:** buenos resultados in vitro e in vivo frente a ITU provocadas por *E. coli*-BLEE<sup>22</sup>.

### **Enterobacterias productoras de carbapenemasas:**

Las infecciones producidas por bacterias con carbapenemasas son principalmente de origen nosocomial y están asociadas con altas tasas de mortalidad. Se recomienda que los carbapenems sean la base del tratamiento como base de una terapia combinada siempre que la CMI de meropenem sea <8mg/L. Por lo tanto, se recomienda tratamiento con meropenem 2g/8-6h en infusión continua durante 3 horas, lo cual dificulta su administración en domicilio, debido a su inestabilidad a Tª ambiente y a la necesidad de bombas elastoméricas para su administración, cuya velocidad de infusión no es programable ya que está predeterminada para un volumen de llenado concreto.

Los tratamientos a los que habitualmente son sensibles son la colistina, fosfomicina, tigeciclina y algunos aminoglucósidos. En 2014 se realizó una revisión sistemática de las enterobacterias productoras de carbapenemasas en la que se incluyeron 20 estudios no randomizados y las infecciones más frecuentes fueron la bacteriemia, la neumonía y las ITU. Esta revisión evidenció que el tratamiento combinado fue más efectivo que la monoterapia en infecciones graves. Las combinaciones de antibióticos más utilizadas fueron: tigeciclina con gentamicina, tigeciclina con colistina; y carbapenem con colistina, sin identificar una pauta más eficaz que otra<sup>28</sup>.

No existe en el momento actual ninguna referencia bibliográfica específica acerca del tratamiento de infecciones por microorganismos productores de carbapenemasas en programas TADE, así mismo, sí que hay experiencia en la utilización de tigeciclina, colistina y carbapenems.

### ***Pseudomonas aeruginosa:***

*P. aeruginosa* causa infecciones graves con elevada morbimortalidad en pacientes inmunodeprimidos y principalmente en el ámbito hospitalario, en unidades de cuidados intensivos y en pacientes oncohematológicos. Además, es la causa más frecuente de infección respiratoria crónica en la fibrosis quística. Las infecciones nosocomiales generalmente incluyen neumonías, bacteriemias, infección de herida quirúrgica e ITU.

*P. aeruginosa* es naturalmente resistente a la mayoría de las penicilinas, las cefalosporinas de primera, segunda y muchas de las de tercera generación (salvo ceftazidima y cefepime), las tetraciclinas, el cotrimoxazol y la rifampicina. Tiene la capacidad de producir varios mecanismos de resistencia, como la producción de beta-lactamasas, pérdida de porinas, producción de carbapenemasas o producción de enzimas modificadoras. Cada uno de estos mecanismos condiciona la resistencia a un fármaco o grupo de fármacos. Por lo tanto, el tratamiento de infecciones por *P. aeruginosa* MR debe incluir antimicrobianos seleccionados según el antibiograma.

Los antibióticos con actividad antipseudomonas son: Penicilinas antispeudomónicas (piperacilina-tazobactam); cefalosporinas de tercera generación (ceftazidima y ceftazidima/avibactam), cefalosporinas de cuarta generación (cefepime), nuevas cefalosporinas: ceftolozano-tazobactam, monobactam (aztreonam), carbapenems (imipenem, meropenem), fluorquinolonas (ciprofloxacino y levofloxacino), aminoglicósidos (amikacina y tobramicina), polimixinas (colistina) y fosfomicina. Todos ellos disponibles para su administración en régimen de TADE.

Las infecciones producidas por *P. aeruginosa* MMRR son cada vez más frecuentes y suponen un gran problema de salud pública. El TADE supone una alternativa eficaz para el tratamiento de infecciones producidas por este microorganismo, teniendo como ventajas las propias del ámbito domiciliario, además de la mejora en el control de la diseminación de bacterias multirresistentes.

La mayoría de las opciones de tratamiento a las que puede ser sensible *P. aeruginosa* MMRR pueden administrarse en régimen de TADE, como colistina inhalada o endovenosa, amikacina, tobramicina, e incluso ceftazidima/avibactam y ceftolozano/tazobactam.

Ceftolozano/tazobactam y la ceftazidima/avibactam han sido recientemente aprobados para el tratamiento de ITU y para infecciones intraabdominales complicadas, en este caso, asociado a metronidazol. Además de estas indicaciones clínicas, se han descrito casos clínicos de infecciones graves en los que no había otra opción de tratamiento, como abscesos intraabdominales, neumonía, bacteriemia y osteomielitis, con buenos resultados clínicos<sup>23</sup>. Son fármacos bien tolerados, sus efectos secundarios más frecuentes son diarrea y eosinofilia. Se ha evaluado su administración en bombas electrónicas y elastoméricas<sup>24</sup>; y se ha propuesto su administración en infusión continua, posible en administración con bomba electrónica, para pacientes con altos índices de resistencia antibiótica.



### ***Acinetobacter* spp:**

Se trata de una bacteria con gran capacidad para desarrollar mecanismos de resistencia antibiótica. Principalmente está asociado a infecciones nosocomiales, siendo las más frecuentes son la neumonía asociada a ventilador, bacteriemias, infecciones de catéter, infecciones del tracto urinario (sobre todo asociadas a sonda vesical), e infección de herida quirúrgica.

Para las cepas con resistencia antibiótica las opciones terapéuticas son limitadas, siendo las polimixinas, minociclina y tigeciclina las principales opciones. De todos los tratamientos disponibles, la colistina es el más frecuentemente utilizado y podría administrarse en régimen de TADE, teniendo en cuenta que para su administración sería necesario realizar docencia al paciente o a su cuidador para su administración domiciliaria. No existe actualmente evidencia científica acerca de infecciones por *Acinetobacter* sp. que hayan recibido tratamiento en programas TADE.

### **RECOMENDACIONES FINALES**

- El TADE se ha evidenciado como efectivo y seguro en las infecciones por bacterias MMRR. (A-II)
- Las pautas de tratamiento antimicrobiano en las infecciones por bacterias multirresistentes (MR), así como su duración en régimen de TADE deben ser las mismas que para los pacientes en hospitalización convencional. (C-III)
- Durante el periodo de tratamiento se deben guardar las medidas habituales de higiene, control y prevención del microorganismo, siendo la higiene de manos la base de las medidas a adoptar en domicilio. (A-II).
- La administración domiciliaria de meropenem requiere de la participación del propio paciente o su cuidador, así como su adiestramiento en el manejo de dispositivos de infusión portátiles dada la inestabilidad de este antibiótico a temperatura ambiente. (A-II)
- Daptomicina supone una opción idónea para el TADE como alternativa a vancomicina debido a su posología de administración única diaria, no precisar monitorización de niveles plasmáticos y menor tasa de efectos adversos que la vancomicina en relación a nefrotoxicidad principalmente. (B-II)

## BIBLIOGRAFIA

1. Pérez-López J, Pardos-Gea J, San José Laporte A, Almirante Gragera B, Marian Oltean D, Vilardell Tarrés M. Antibioticoterapia intravenosa domiciliaria en el tratamiento de las infecciones causadas por microorganismos multirresistentes. *Med Clin (Barc)* 2012; 138(13):557-561.
2. Mujal A, Sola J, Hernandez M, Villarino MA, Machado ML, Baylina M, *et al.* Safety and effectiveness of home intravenous antibiotic therapy for multidrug-resistant bacterial infections. *Eur J Clin Microbiol Infect Dis* 2015; 34:1125-1133.
3. Cosgrove SE, Carmeli Y. The impact of antimicrobial resistance on health and economic outcomes. *Clin Infect Dis* 2003; 36(11):1433-7.
4. Magiorakos P, Srinivasan A, Carey RB, Carmeli Y, Falagas ME, Giske CG, *et al.* Multidrug-resistant, extensively drug-resistant and pandrug-resistant bacteria: an international expert proposal for interim standard definitions for acquired resistance. *Clin Microbiol Infect* 2012; 18(3):268–81.
5. Paladino J a, Poretz D. Outpatient parenteral antimicrobial therapy today. *Clin Infect Dis* 2010; 51 Suppl 2(Suppl 2):S198-208.
6. Mensa J, Llinares P, Picazo JJ, Bouza E, Borges M, Serrano R, *et al.* Guía de tratamiento de la infección producida por *Staphylococcus aureus* resistente a meticilina. 2008; 21(4):234–58.
7. Shrestha NK, Mason P, Gordon SM, Neuner E, Nutter B, O'Rourke C, *et al.* Adverse events, healthcare interventions and healthcare utilization during home infusion therapy with daptomycin and vancomycin: a propensity score-matched cohort study. *J Antimicrob Chemother* 2014; 69(5):1407–15.
8. Seaton RA, Gonzalez-Ramallo VJ, Prisco V, Marcano-Lozada M, Gonzalez-Ruiz A, Gallegos B, *et al.* Daptomycin for outpatient parenteral antibiotic therapy: a European registry experience. *Int J Antimicrob Agents* 2013; 41(5):468–72.
9. Rodríguez-Baño J, Barberán J, Cercenado GE, Morosini GMI, *et al.* Daptomicina en el paciente con hospitalización a domicilio. *Med Clin* 2010; 135(3):48–54.
10. Raad I, Darouiche R, Vazquez J, Lentnek A, Hachem R, Hanna H, *et al.* Efficacy and Safety of Weekly Dalbavancin Therapy for Catheter-Related

Bloodstream Infection Caused by Gram-Positive Pathogens. *Clin Infect Dis* 2005; 40:374-80.

11. McCool R, Gould IM, Eales J, Barata T, Arber M, Fleetwood K, *et al.* Systematic review and network meta-analysis of tedizolid for the treatment of acute bacterial skin and skin structure infections caused by MRSA. *BMC Infect Dis* 2017; 17:39.
12. Alkiza ME, Arriola E, Basterretxea M, Díaz I, Esparza MH, García-arenzana JM, *et al.* Guía de actuación ante *Staphylococcus aureus* resistente a meticilina (SARM) en centros gerontológicos, sociosanitarios y unidades de media-larga estancia. 2013; 39(5):329–41.
13. Kumar A, Ellis P, Arabi Y, Roberts D, Light B, Parrillo JE, *et al.* Initiation of inappropriate antimicrobial therapy results in a five fold reduction of survival in human septic shock. *Chest* 2009; 136(5):1237–1248.
14. Tumbarello M, Sanguinetti M, Montuori E, Trecarichi EM, Posteraro B, Fiori B, *et al.* Predictors of mortality in patients with bloodstream infections caused by extended-spectrum-beta-lactamase-producing Enterobacteriaceae: importance of inadequate initial antimicrobial treatment. *Antimicrob Agents Chemother* 2007; 51(6):1987–1994.
15. Vardakas KZ, Tansarli GS, Rafailidis PI, Falagas ME. Carbapenems versus alternative antibiotics for the treatment of bacteraemia due to Enterobacteriaceae producing extended-spectrum  $\beta$ -lactamases: a systematic review and meta-analysis. *J Antimicrob Chemother* 2012; 67(12):2793–2803.
16. Bazaz R, Chapman ALN, Winstanley TG. Ertapenem administered as outpatient parenteral antibiotic therapy for urinary tract infections caused by extended-spectrum-beta-lactamase-producing Gram-negative organisms. *J Antimicrob Chemother* 2010; 65(7):1510–1513.
17. Collins VL, Marchaim D, Pogue JM, Moshos J, Bheemreddy S, Sunkara B, *et al.* Efficacy of ertapenem for treatment of bloodstream infections caused by extended-spectrum- $\beta$ -lactamase-producing Enterobacteriaceae. *Antimicrob Agents Chemother* 2012; 56(4):2173–2177.
18. Lee N-Y, Lee C-C, Huang W-H, Tsui K-C, Hsueh P-R, Ko W-C. Carbapenem therapy for bacteremia due to extended-spectrum- $\beta$ -lactamase-producing *Escherichia coli* or *Klebsiella pneumoniae*: implications of ertapenem susceptibility. *Antimicrob Agents Chemother* 2012; 56(6):2888–2893.

19. Rodríguez-Baño J, Navarro MD, Retamar P, Picón E, Pascual Á.  $\beta$ -Lactam/ $\beta$ -lactam inhibitor combinations for the treatment of bacteremia due to extended-spectrum  $\beta$ -lactamase-producing *Escherichia coli*: a post hoc analysis of prospective cohorts. *Clin Infect Dis* 2012; 54(2):167–174.
20. Lee N-Y, Lee C-C, Huang W-H, Tsui K-C, Hsueh P-R, Ko W-C. Cefepime Therapy for Monomicrobial Bacteremia Caused by Cefepime-Susceptible Extended-Spectrum Beta-Lactamase-Producing Enterobacteriaceae: MIC Matters. *Clin Infect Dis* 2012; 56(4):488–495.
21. Kelesidis T, Karageorgopoulos DE, Kelesidis I, Falagas ME. Tigecycline for the treatment of multidrug-resistant Enterobacteriaceae: a systematic review of the evidence from microbiological and clinical studies. *J Antimicrob Chemother* 2008; 62(5):895–904.
22. Falagas ME, Lourida P, Poulikakos P, Rafailidis PI, Tansarli GS. Antibiotic treatment of infections due to carbapenem-resistant Enterobacteriaceae: systematic evaluation of the available evidence. *Antimicrob Agents Chemother* 2014; 58(2):654–663.
23. Munita JM, Aitken SL, Miller WR, Perez F, Rosa R, Shimose LA, et al. Multicenter Evaluation of Ceftolozane/Tazobactam for Serious Infections Caused by Carbapenem-Resistant *Pseudomonas aeruginosa*. *Clin Infect Dis* 2017; 65(1):158-161.
24. Terracciano J, Rhee EG, Walsh J. Chemical Stability of Ceftolozane/Tazobactam in Polyvinylchloride Bags and Elastomeric Pumps. *Curr Ther Res Clin Exp* 2017; 84:22-25

## 8-J. INFECCIONES ASOCIADAS A TERAPIA BIOLÓGICA.

**Autor: Marcos Pajarón Guerrero. Hospital Marqués de Valdecilla. Santander**

### INTRODUCCIÓN

Las terapias biológicas están basadas en la administración exógena de diversos tipos de moléculas sintéticas relacionadas con la respuesta inmunitaria (anticuerpos, receptores solubles, citocinas o antagonistas de citocinas.)<sup>1</sup> El objetivo es la modulación de un determinado mecanismo molecular implicado en la etiopatogenia de la enfermedad autoinmune de base, intentando no alterar el resto de funciones inmunitarias del individuo o haciéndolo de la manera más leve posible. En general, el efecto inmunosupresor es menor en comparación con los inmunosupresores clásicos, sin embargo, sí pueden

predisponer a la adquisición y/o reactivación de ciertas enfermedades infecciosas.<sup>2</sup>

Las indicaciones terapéuticas se centran en el ámbito de los trasplantes para control del rechazo, la enfermedad onco-hematológica y la enfermedad autoinmune (artritis reumatoide, espondilitis anquilopoyética, artritis psoriásica, artritis crónica juvenil, enfermedad inflamatoria intestinal complicada, esclerosis múltiple).<sup>3</sup>

El uso de estos fármacos está ampliamente extendido dada la prevalencia cada vez más elevada de las enfermedades previamente comentadas, motivando la aparición cada vez más frecuente de efectos secundarios, siendo las infecciones las más habituales con una importante repercusión en la morbilidad de estos pacientes.<sup>4-5</sup>

*Pérez-Sola et al.<sup>6</sup> analizaron la incidencia de infecciones en pacientes que recibían tratamiento con anti-TNF. Se analizaron 6969 pacientes observándose una prevalencia de infecciones graves entre el 4 y el 13%, con una incidencia de 5/100 pacientes/año. Las infecciones más frecuentes fueron las IPPB (12,18 casos/1.000 pacientes/año), la neumonía (5,97 casos/1.000 pacientes/año), la cistitis (3,92 casos/1.000 pacientes/año), la tuberculosis (3,51 casos/1.000 pacientes/año) y las infecciones articulares (3,76 casos/1.000 pacientes/año). Los patógenos más frecuentes fueron S. aureus, S. epidermidis, E. coli, P. aeruginosa y Salmonella spp. El virus de la varicela zóster y el virus del herpes simple causaron la mayoría de los casos de infecciones virales con germen identificable. La candidiasis mucocutánea fue la más frecuente entre las infecciones fúngicas. La incidencia de infecciones por gérmenes oportunistas incluido hongos e infecciones bacterianas no habituales es en nuestro medio muy baja. La mortalidad fue del 3%, siendo sus principales causas la neumonía, la sepsis, la tuberculosis, la infección abdominal y la endocarditis infecciosa.<sup>6</sup> En este estudio se alcanzó el diagnóstico microbiológico solamente en un 40% de los casos, careciendo de identificación microbiológica la mitad de los fallecidos. El pronóstico de estos pacientes puede variar en función del diagnóstico etiológico siendo crucial la adecuada recogida de muestras microbiológicas.<sup>7</sup>*

## **PRINCIPALES AGENTES BIOLÓGICOS**

En la Tabla 8 y 9 se exponen de forma resumida, los principales agentes biológicos de los que se dispone en la actualidad, y las principales infecciones asociadas a cada agente biológico. Los anti-TNF, son los agentes biológicos de los que se dispone de mayor experiencia en su uso lo que obliga a prestarles una mayor atención. La aparición constante de nuevos fármacos obliga a revisar frecuentemente la lista de fármacos implicados y sus posibles efectos secundarios.

## RECOMENDACIONES GENERALES ESPECIFICAS PARA PROGRAMAS TADE

El TADE en estos pacientes con una elevada morbilidad requiere de una cuidadosa evaluación tanto clínica como socio-familiar previa a su traslado al domicilio en un intento de prevenir complicaciones durante el mismo.<sup>8-9</sup> El TADE en este grupo de pacientes no está estandarizado porque no se dispone de ensayos clínicos comparativos de la administración ambulatoria de antibióticos endovenosos con el tratamiento hospitalario convencional ni de series descriptivas al respecto. Sin embargo, se recomienda iniciar una terapia antibiótica de amplio espectro de cara a un rápido control de la infección y desescalar en función del antibiograma y de acuerdo a las actuales guías clínicas en cuanto se disponga de documentación microbiológica.<sup>10-12</sup>

Así se recomienda como estrategia de actuación ante un paciente con fiebre asociada a tratamiento con un agente biológico:

- Inicialmente es necesario valorar el riesgo de infección grave lo que determinara el lugar del tratamiento ya sea ambulatorio, en un programa TADE o en hospitalización convencional. Esta valoración reunirá aspectos de comorbilidad, enfermedad de base y tipo de inmunosupresión, además de la situación clínica del paciente.
- Se indicará la extracción de hemograma con perfil hepático, coagulación y perfil de sepsis para evaluar severidad de la infección.
- Previo al traslado al domicilio; revisaremos las muestras microbiológicas ya recogidas y reevaluar la necesidad de recoger más muestras en función de la clínica que presente el paciente. En la detección de infecciones víricas se realizará el antígeno o PCR para CMV, también la detección de antígeno y cultivo viral de frotis nasofaríngeo para HVS-HVZ. Por último, confirmar o no, la infección fúngica a través de la prueba de galactomanano y/o el antígeno micelio para candidas.
- Pruebas de imagen: se solicitará en un principio una radiografía de tórax, posteriormente dependiendo de la evolución del proceso infeccioso se evaluará la necesidad de más pruebas de imagen en función de la sospecha del foco.

## TRATAMIENTO ANTIBIÓTICO

- Se recomienda la utilización empírica de dos antimicrobianos de forma combinada para cubrir adecuadamente infecciones tanto por microorganismos gramnegativos como grampositivos hasta la confirmación microbiológica y resultados de antibiograma. En caso de asociación de antibióticos se valorará la posibilidad de autoadministración del TADE por parte del paciente y/o su cuidador

- La elección de un antibiótico dependerá fundamentalmente entre otros factores, del mapa de resistencias frente a antimicrobianos que presenta una determinada comunidad o centro sanitario.
- Las pautas de tratamiento antimicrobiano en las infecciones asociadas a terapia biológica, así como su duración en régimen de TADE deben ser las mismas que para los pacientes en hospitalización convencional.
- Los antimicrobianos más frecuentemente empleados son; los carbapenems (meropenem, imipenem, ertapenem), las penicilinas antipseudomónicas (piperacilina-tazobactam), las cefalosporinas con actividad antipseudomónica (cefepima, ceftazidima), asociados a un glicopéptido como la vancomicina o teicoplanina, sin embargo, si se sospecha SAMR se valorará el uso de la daptomicina.
- Recientemente se han incorporado nuevos antimicrobianos, como el ceftolozano-tazobactam y la ceftazidima-avibactam, ambas útiles fundamentalmente en el tratamiento de infecciones por microorganismos gramnegativos multirresistentes; en el ámbito de las infecciones producidas por grampositivos disponemos de tedizolid, ceftarolina y dalvancina. En cualquier caso, estos antimicrobianos preferiblemente se emplearán en la terapia dirigida con documentación microbiológica, o en su defecto en pacientes con sospecha clínica elevada de infección por microorganismos multirresistente.
- En caso de alergia a la penicilina o carbapenémicos se valorará tratamiento antibiótico con aztreonam asociado a teicoplanina.
- Se sospechará infección fúngica si persiste fiebre pasados 3-5 días del inicio de la pauta antibiótica. Por lo que se recomienda añadir caspofungina, como antifúngico empírico a la espera resultados microbiológicos.<sup>13</sup>
- Se sospechará infección vírica ante una clínica sugestiva de infección viral o persistencia de la fiebre a pesar del tratamiento antibiótico antibacteriano y antifúngico óptimo, o según los antecedentes del agente biológico utilizado. Si se sospecha o confirma infección grave por CMV se utilizará ganciclovir. Si la sospecha es por HVS o HVZ se indicará aciclovir. Forcarnet se empleará como alternativa en ambos casos, si existe fracaso terapéutico con los agentes previamente mencionados.<sup>14</sup>

## RECOMENDACIONES FINALES

- Los pacientes con procesos infecciosos relacionados con agentes biológicos deben de reunir criterios de estabilidad clínica y hemodinámica antes de realizar TADE en régimen de HAD. **(B-II)**.
- Las pautas de tratamiento antimicrobiano en las infecciones asociadas a terapia biológica, así como su duración en régimen de TADE deben ser las mismas que para los pacientes en hospitalización convencional. **(C-III)**.
- En el caso del TADE en infecciones víricas, infecciones fúngicas, así como en aquellas causadas por microorganismos oportunistas, se seguirán las recomendaciones terapéuticas recogidas en las guías existentes al respecto. **(C-III)**

## BIBLIOGRAFIA

1. Smolen JS, Aletaha D, Koeller M, Weisman MH, Emery P. New therapies for treatment of rheumatoid arthritis. *Lancet* 2007; 370:1861–74.
2. Koo S, Marty FM, Baden LR. Infectious complications associated with immunomodulating biologic agents. *Infect Dis Clin North Am* 2010; 24(2):285-306.
3. Furst D, Breedveld F, Kalden J, *et al*. Updated consensus statement on biological agents for the treatment of rheumatic diseases, 2007. *Ann Rheum Dis* 2007; 66 Suppl 3:2-22.
4. C. Rodríguez Lozano. Safety of biological therapies: new data from BIOBADASER. *Reumatol Clin*. 2011;6(S3):S1–S6.
5. Saketkoo L, Espinoza L. Impact of biologic agents on infectious diseases. *Infect Dis Clin North Am* 2006; 20:931-61.
6. Pérez-Sola MJ, Torre-Cisneros J, Pérez-Zafrilla B, Carmona L, Descalzo MA, Gómez-Reino JJ, BIOBADASER Study Group. Infections in patients treated with tumor necrosis factor antagonists: incidence, etiology and mortality in the BIOBADASER registry. *Med Clin (Barc)* 2011; 137(12):533–540.
7. Baron EJ, Miller JM, Weinstein MP, Richter SS, Gilligan PH, Thomson RB *et al*. A Guide to Utilization of the Microbiology Laboratory for Diagnosis of Infectious Diseases: 2013 Recommendations by the Infectious Diseases Society of America (IDSA) and the American Society for Microbiology (ASM) IDSA guidelines. *Clin Infect Dis* 2013; 57(4):e22-e121
8. Tice AD, Rehm SJ, Dalovisio JR, Bradley JS, Martinelli LP *et al*. IDSA Practice guidelines for outpatient parenteral antimicrobial therapy. IDSA guidelines. *Clin Infect Dis* 2004;38(12):1651–1672
9. Sanroma P, Sampedor I, González CR, Baños MT. Recomendaciones clínicas y procedimientos en Hospitalización Domiciliaria. Santander: Fundación Marqués de Valdecilla; 2011.



10. Dellinger RP, Levy MM, Rhodes A, Annane D, Gerlach H, Opal SM *et al*. Surviving Sepsis Campaign: international guidelines for management of severe sepsis and septic shock. *Crit Care Med* 2013; 41(2):580–637
11. Mirón M, Estrada Cuixart O, González-Ramallo VJ. Protocolos de tratamiento antimicrobiano domiciliario endovenoso (TADE). 1ªth Ed. Madrid: Elsevier-Doyma 2008
12. Llinares P, Sousa MD. Síndrome Séptico. In: Gomez J, Gobernado M, Fariñas MC, Garcia E, Soriano A, Gil Brusola. Enfoque clínico de los grandes síndromes infecciosos. Madrid: Ergon; 2013, p. 383-91
13. Arnold TM, Sears CR, Hage CA. Invasive fungal infections in the era of biologics. *Clin Chest Med* 2009; 30(2):279-86)
14. M. Salavert, R. Granada, A. Díaz y R. Zaragoza. Papel de las infecciones víricas en pacientes inmunodeprimidos *Med Intensiva* 2011; 35(2):117-125.

**Tabla 1. Solidez de las recomendaciones y calidad de la evidencia.**

| Category /Grading strength of recommendations | Definition                                                                                                                                                                                                                                  |
|-----------------------------------------------|---------------------------------------------------------------------------------------------------------------------------------------------------------------------------------------------------------------------------------------------|
| <b>A</b>                                      | Strongly supports a recommendation for use                                                                                                                                                                                                  |
| <b>B</b>                                      | Moderately supports a recommendation for use                                                                                                                                                                                                |
| <b>C</b>                                      | Marginally supports a recommendation for use                                                                                                                                                                                                |
| <b>D</b>                                      | Supports a recommendation against use                                                                                                                                                                                                       |
| Quality of evidence                           |                                                                                                                                                                                                                                             |
| <b>I</b>                                      | Evidence from at least one properly designed randomized, controlled trial                                                                                                                                                                   |
| <b>II</b>                                     | Evidence from at least one well-designed clinical trial, without randomization; from cohort or case-controlled analytic studies (preferably from 1 center); from multiple time series; or from dramatic results of uncontrolled experiments |
| <b>III</b>                                    | Evidence from opinions of respected authorities, based on clinical experience, descriptive case studies                                                                                                                                     |

**Tabla 2. Tipos de catéteres y posibles complicaciones**

| Tipo de catéter                                                                                      | Sitio de inserción                                                                                                                                                   | Longitud                     | Tasa de BRCV (*)                                 | Comentarios                                                                                                                                                                                                                                                                                                                                                                                                                                   | Duración                                                           |
|------------------------------------------------------------------------------------------------------|----------------------------------------------------------------------------------------------------------------------------------------------------------------------|------------------------------|--------------------------------------------------|-----------------------------------------------------------------------------------------------------------------------------------------------------------------------------------------------------------------------------------------------------------------------------------------------------------------------------------------------------------------------------------------------------------------------------------------------|--------------------------------------------------------------------|
| <b>PERIFÉRICO</b>                                                                                    |                                                                                                                                                                      |                              |                                                  |                                                                                                                                                                                                                                                                                                                                                                                                                                               |                                                                    |
| Sólo permiten la infusión de terapias no vesicantes, con osmolaridad < 500-600 mosm y pH entre 5 y 9 |                                                                                                                                                                      |                              |                                                  |                                                                                                                                                                                                                                                                                                                                                                                                                                               |                                                                    |
| Corto                                                                                                | Inserción en venas del antebrazo.                                                                                                                                    | < 8cm                        | 0,5                                              | Flebitis con uso prolongado.                                                                                                                                                                                                                                                                                                                                                                                                                  | < 7 días                                                           |
| Medio                                                                                                | Se inserta por vía antecubital hasta el segmento proximal de la vena basilíca o cefálica. No penetra en venas centrales y queda en el segmento distal de las mismas. | Variable entre 7,6 y 20,3 cm | 0,2                                              | Tasa más baja de infección que el CVC no tunelizado.                                                                                                                                                                                                                                                                                                                                                                                          | 2 semanas (pueden durar hasta 4-6 semanas)                         |
| <b>CENTRAL</b>                                                                                       |                                                                                                                                                                      |                              |                                                  |                                                                                                                                                                                                                                                                                                                                                                                                                                               |                                                                    |
| Permiten la infusión de terapias vesicantes, con osmolaridad >500-600 mosm y/o pH < 5 o > 9          |                                                                                                                                                                      |                              |                                                  |                                                                                                                                                                                                                                                                                                                                                                                                                                               |                                                                    |
| Catéter central de inserción periférica (CCIP)                                                       | Inserción es a través de una vena periférica (cefálica, basilíca, radial accesoria) hasta la vena cava superior.                                                     | > 20 cm                      | 2,1                                              | Su mantenimiento es más fácil y se asocian con menos complicaciones mecánicas que los CVC no tunelizados.                                                                                                                                                                                                                                                                                                                                     | > 30 días                                                          |
| Catéter venoso central no tunelizado (CVC)                                                           | Para tratamiento temporales. Una o varias luces.<br><br>Se inserta percutáneamente en venas centrales (yugular interna, subclavia o femoral).                        | > 8 cm                       | 2,7                                              | La localización yugular aumenta el riesgo de infección aunque presenta menores complicaciones mecánicas.<br>La localización en subclavia se relaciona con menor riesgo de infección aunque presenta más complicaciones mecánicas (neumotórax, punción lesión nerviosa periférica).<br>La localización femoral se recomienda sólo en niños pues en adultos presenta mayor riesgo de trombosis venosa profunda y de complicaciones infecciosas. | < 30 días<br>(se recomienda menos de 15 días)                      |
| CVC tunelizado                                                                                       | Se inserta en las venas centrales a través de un túnel<br><br>Precisa técnica quirúrgica.                                                                            | >8 cm                        | 1,6                                              | Para tratamientos prolongados. Una ó varias luces.<br>El anclaje se realiza mediante un manguito de dacron, que posteriormente se fibrosa y proporciona una barrera a la migración de los microorganismos.                                                                                                                                                                                                                                    | > 30 días (hasta 6 meses)                                          |
| CVC con reservorio implantable                                                                       | Dispositivo con reservorio implantable totalmente colocado subcutáneo y al que se accede mediante puncionable desde el exterior.<br>Precisa técnica quirúrgica.      | > 8 cm                       | No precisa cuidado de punto de inserción.<br>0,1 | Requiere técnica quirúrgica para su extracción. Precisa heparinización para su mantenimiento                                                                                                                                                                                                                                                                                                                                                  | Permanente<br>(se recomienda su uso en terapias de más de 6 meses) |

BRCV : Bacteriemia relacionada con catéter. (\*) tasa por 1000 días de catéter

**Tabla 3. Recomendación de elección del catéter venoso**

| Terapia osmolaridad < 500, pH 5-9, baja capacidad vesicante       |                                                        |                                                    |                                                                                            |
|-------------------------------------------------------------------|--------------------------------------------------------|----------------------------------------------------|--------------------------------------------------------------------------------------------|
| < 7 días                                                          | 7-14 días                                              | 15-30 días                                         | >30 días                                                                                   |
| Catéter periférico corto                                          | 1ª opción: catéter de línea media.<br>2ª opción: CCIP. | 1ª opción: CCIP.<br>2ª opción : CVC no tunelizado. | CCIP ó CVC tunelizado.<br>CVC totalmente implantado en terapias muy prolongadas > 6 meses. |
| Terapia osmolaridad > 500, pH < 5 o > 9, alta capacidad vesicante |                                                        |                                                    |                                                                                            |
| < 7 días                                                          | 7-14 días                                              | 15-30 días                                         | >30 días                                                                                   |
|                                                                   | 1ª opción : CCIP.<br>2ª opción: CVC no tunelizado.     |                                                    | CCIP ó CVC tunelizado.<br>CVC totalmente implantado en terapias muy prolongadas > 6 meses. |

CCIP: catéter central de inserción periférica; CVC: catéter venoso central

**Tabla 4. Complicaciones asociadas a catéteres que motivaron el traslado al hospital o modificación del tratamiento**

|                                        | Número | Tasa x 1000 días de tratamiento en domicilio |
|----------------------------------------|--------|----------------------------------------------|
| <b>Infecciosas</b>                     |        |                                              |
| Flebitis                               | 66     | 0,64                                         |
| Infección del tunel                    | 1      | 0,01                                         |
| Tromboflebitis supurada                | 2      | 0,02                                         |
| Bacteriemia relacionada con el catéter | 4      | 0,04                                         |
| <b>No infecciosas</b>                  |        |                                              |
| Trombosis                              | 6      | 0,06                                         |
| Pérdida de catéter                     | 37     | 0,36                                         |
| Extravasación                          | 22     | 0,21                                         |
| Otras                                  | 7      | 0,07                                         |
| Total                                  | 145    | 1,4                                          |

Total de días de tratamiento en domicilio 103.253

Total de episodios 9315

Datos del registro TADE 30-12-2016

**Tabla 5. Características de los antimicrobianos más comúnmente utilizados en TADE <sup>(5-9)</sup>**

| Antimicrobiano                   | Dilución              |                  | Protección de la luz | Administración |                 |             | Tiempo infusión (min)       | Riesgo flebitis* | Dispositivo alternativo | Estabilidad                     |          |
|----------------------------------|-----------------------|------------------|----------------------|----------------|-----------------|-------------|-----------------------------|------------------|-------------------------|---------------------------------|----------|
|                                  | Concentración (mg/ml) | Vehículo         |                      | IV directa     | IV intermitente | IV continua |                             |                  |                         | Tª Ambiente                     | Nevera   |
|                                  |                       |                  |                      |                |                 |             |                             |                  |                         | (<25ºC)                         | (2-8ºC)  |
| Aciclovir                        | 5                     | SF 0,9%<br>SG 5% | Sí                   | No             | Sí              | No          | 60                          | 1                | E, BE                   | 7 días SF 0,9%<br>21 días SG 5% | No       |
| Amikacina                        | 0,25-5                | SF 0,9%<br>SG 5% | Sí                   | No             | Sí              | No          | 60                          | 1                | E, BE                   | 24 horas                        | 60 días  |
| Amoxicilina/clavulánico‡         | 20-feb                | SF 0,9%          | No                   | Sí             | Sí              | No          | 30                          | 2                | -                       | Uso inmediato                   | No       |
| Ampicilina                       | 20-30                 | SF 0,9%          | Sí                   | Sí             | Sí              | No          | 30                          | 2                | E, BE                   | 24 horas                        | 4 días   |
| Anfotericina B complejo lipídico | 01-feb                | SG 5%            | Sí                   | No             | Sí              | No          | 60-120                      | 2                | BE                      | 24 horas                        | 7 días   |
| Anfotericina B liposomal         | 0,2-2                 | SG 5%            | Sí                   | No             | Sí              | No          | 30-60                       | 2                | BE                      | 72 horas                        | 7 días   |
| Anidulafungina                   | 0,77                  | SF 0,9%<br>SG 5% | Sí                   | No             | Sí              | No          | 90                          | 1                | BE                      | 48 horas                        | 24 horas |
| Azitromicina                     | 1-2 mg/ml             | SF 0,9%<br>SG 5% | No                   | No             | Sí              | No          | 60 (2mg/ml)<br>120 (1mg/ml) | 1                | BE                      | 24 horas                        | 7 días   |
| Aztreonam                        | oct-20                | SF 0,9%<br>SG 5% | Sí                   | Sí             | Sí              | No          | 20-60                       | 1                | E, BE                   | 48 horas                        | 7 días   |
| Caspofungina                     | 0,2-0,5               | SF 0,9%          | Sí                   | No             | Sí              | No          | 60                          | 1                | E, BE                   | 24 horas                        | 48 horas |
| Cefazolina                       | oct-20                | SF 0,9%<br>SG 5% | Sí                   | Sí             | Sí              | No          | 30-60                       | 1                | E, BE                   | 24 horas                        | 7 días   |
| Cefepime                         | oct-20                | SF 0,9%<br>SG 5% | Sí                   | Sí             | Sí              | Sí§         | 30                          | 1                | E, BE                   | 48 horas                        | 7 días   |
| Cefotaxima                       | 20-50                 | SF 0,9%<br>SG 5% | Sí                   | Sí             | Sí              | No          | 30-60                       | 1                | E, BE                   | 24 horas                        | 7 días   |
| Ceftarolina                      | 12                    | SF 0,9%<br>SG 5% | Sí                   | No             | Sí              | No          | 30                          | 2                | E, BE                   | 6 horas                         | 24 horas |
| Ceftazidima                      | 20                    | SF 0,9%<br>SG 5% | Sí                   | Sí             | Sí              | Sí§         | 30-60                       | 1                | E, BE                   | 24 horas                        | 7 días   |
| Ceftolozano/tazobactam           | 10-may                | SF 0,9%          | Sí                   | No             | Sí              | Sí§         | 60                          | 1                | E, BE                   | 24 horas                        | 7 días   |

|                          |                              |                  |    |    |    |                 |        |   |       |          |          |
|--------------------------|------------------------------|------------------|----|----|----|-----------------|--------|---|-------|----------|----------|
|                          |                              | SG 5%            |    |    |    |                 |        |   |       |          |          |
| Ceftriaxona              | oct-20                       | SF 0,9%<br>SG 5% | Sí | Sí | Sí | No              | 30     | 1 | E, BE | 48 horas | 10 días  |
| Ciprofloxacino           | 02-abr                       | NP               | Sí | No | Sí | No              | 60     | 1 | E, BE | NP       | NP       |
| Claritromicina           | 2                            | SF 0,9%<br>SG 5% | No | No | Sí | No              | 60     | 1 | BE    | 6 horas  | 48 horas |
| Clindamicina             | 06-dic                       | SF 0,9%<br>SG 5% | Sí | No | Sí | No              | 30-60  | 1 | E, BE | 24 horas | No       |
| Cloxacilina              | oct-20                       | SF 0,9%<br>SG 5% | Sí | Sí | Sí | No              | 60     | 2 | BE    | 24 horas | 7 días   |
| Colistina                | 1 MUI/50 mL<br>(1 MIU=80 mg) | SF 0,9%<br>SG 5% | Si | Si | Si | No              | 30     | 1 | E, BE | 8 horas  | 48 horas |
| Dalbavancina             | 01-may                       | SG 5%            | No | No | Sí | No              | 30     | 1 | BE    | 48 horas | 48 horas |
| Daptomicina              | 05-ago                       | SF 0,9%          | No | Sí | Sí | No              | 30     | 1 | E, BE | 12 horas | 24 horas |
| Ertapenem                | oct-20                       | SF 0,9%          | No | No | Sí | No              | 30     | 2 | E, BE | 6 horas  | 24 horas |
| Fluconazol               | 2                            | NP               | Sí | No | Sí | No              | 30-60  | 2 | E, BE | NP       | NP       |
| Fosfomicina              | 16                           | SG 5%            | No | No | Sí | No              | 60     | 3 | E, BE | 24 horas | 96 horas |
| Ganciclovir <sup>#</sup> | 01-may                       | SF 0,9%<br>SG 5% | Sí | No | Sí | No              | 60     | 1 | E, BE | 35 días  | 35 días  |
| Gentamicina              | 01-mar                       | SF 0,9%<br>SG 5% | Sí | No | Sí | No              | 30-120 | 1 | E, BE | 24 horas | 14 días  |
| Imipenem                 | 05-oct                       | SF 0,9%<br>SG 5% | No | No | Sí | No              | 30-60  | 2 | E, BE | 10 horas | 48 horas |
| Levofloxacino            | 5                            | NP               | Sí | No | Sí | No              | 60     | 1 | BE    | NP       | NP       |
| Linezolid                | 2                            | NP               | Sí | No | Sí | No              | 30-120 | 1 | BE    | NP       | NP       |
| Meropenem                | oct-20                       | SF 0,9%          | Sí | Sí | Sí | Sí <sup>§</sup> | 30     | 1 | E, BE | 6 horas  | 24 horas |
| Metronidazol             | 5                            | NP               | No | No | Sí | No              | 60     | 1 | BE    | NP       | NP       |
| Micafungina              | 0,5-2                        | SF 0,9%<br>SG 5% | Sí | No | Sí | No              | 60     | 1 | BE    | 48 horas | 96 horas |
| Moxifloxacino            | 1,6                          | NP               | No | No | Sí | No              | 60     | 1 | BE    | NP       | NP       |
| Penicilina G sódica      | 20.000 –<br>10.000 U/ml      | SF 0,9%          | Sí | Sí | Sí | Sí              | 30     | 2 | E, BE | 24 horas | 24 horas |

|                         |            |                  |    |    |    |                 |        |   |       |          |          |
|-------------------------|------------|------------------|----|----|----|-----------------|--------|---|-------|----------|----------|
| Piperacilina/tazobactam | 40/5-80/10 | SF 0,9%<br>SG 5% | Sí | Sí | Sí | Sí <sup>§</sup> | 30     | 2 | E, BE | 24 horas | 7 días   |
| Rifampicina             | 0,6-1,2    | SF 0,9%<br>SG 5% | No | No | Sí | No              | 180    | 2 | BE    | 24 horas | 72 horas |
| Tedizolid               | 0,8        | SF 0,9%          | No | No | Sí | No              | 60     | 1 | BE    | 24 horas | 24 horas |
| Teicoplanina            | 04-jun     | SF 0,9%<br>SG 5% | Sí | Sí | Sí | No              | 30     | 2 | BE    | 24 horas | 7 días   |
| Tigeciclina             | 0,5        | SF 0,9%<br>SG 5% | No | No | Sí | No              | 30-60  | 2 | E, BE | 24 horas | 48 horas |
| Tobramicina             | 03-abr     | SF 0,9%<br>SG 5% | Sí | No | Sí | No              | 60     | 1 | E, BE | 48 horas | 48 horas |
| Vancomicina             | 5          | SF 0,9%<br>SG 5% | Sí | No | Sí | Sí              | 60     | 2 | E, BE | 24 horas | 4 días   |
| Voriconazol             | 2          | SF 0,9%<br>SG 5% | Sí | No | Sí | No              | 60-120 | 2 | BE    | 8 días   | 8 días   |

\* **Riesgo de flebitis:** 1 bajo, 2 moderado, 3 alto

† **Dispositivo alternativo de administración:** E (Bomba de infusión elastomérica), BE (bomba de infusión electrónica). Consultar datos de estabilidad específicos de cada marca de infusor

‡ Debido a su corta estabilidad, no se recomienda su uso en bombas de perfusión intermitente.

§ **Perfusión extendida o continua.** Cefepime: en bomba de perfusión continua de 24h. Ceftazolina: en bomba de perfusión continua de 24h. Piperacilina/tazobactam: en perfusión extendida de 4h o en bomba de perfusión continua de 24h. Meropenem: en perfusión extendida de 3h. Ceftalozano/tazobactam: en perfusión extendida de 3-4h o en bomba de perfusión continua de 24h.

**NP:** No procede. Antibióticos comercializados en solución para perfusión. No precisan disolución adicional con sueros y su estabilidad se especifica en el envase.



# **Ganciclovir** es un medicamento peligroso que requiere en todos los casos preparación en cabina de seguridad biológica IIb en el Servicio de Farmacia. Se recomienda dispensar con el equipo purgado para minimizar las manipulaciones y administrar con doble guante<sup>17</sup>.

**Tabla 6. Situaciones clínicas subsidiarias de programas TADE**

| <b>Infección</b>                                                                                                        | <b>Comentarios</b>                                                                                                                                                                                                                                                                                                                                                                                                                   |
|-------------------------------------------------------------------------------------------------------------------------|--------------------------------------------------------------------------------------------------------------------------------------------------------------------------------------------------------------------------------------------------------------------------------------------------------------------------------------------------------------------------------------------------------------------------------------|
| Absceso cerebral único o múltiple                                                                                       | Subsidiario de TADE una vez drenado el foco y/o cuando esté indicado por el tamaño del mismo                                                                                                                                                                                                                                                                                                                                         |
| Abscesos intraabdominales y perineales (Hepático, esplénico, pancreático, renal y perirrenal, perirrectal y prostático) | Ídem a anterior                                                                                                                                                                                                                                                                                                                                                                                                                      |
| Artritis, espondilitis y osteomielitis infecciosas                                                                      | Subsidiario de TADE las primeras semanas de tratamiento una vez drenado/desbridado el material óseo o la articulación afecta                                                                                                                                                                                                                                                                                                         |
| Colecistitis y colangitis                                                                                               | Considerar TADE si en la etiología hay la posibilidad de enterobacterias productoras de BLEE, AmpC, etc en las que es recomendable el uso de carbapenems o alternativas de amplio espectro                                                                                                                                                                                                                                           |
| Empiema pleural                                                                                                         | Es recomendable tratamiento inicial con TADE, una vez que tras el drenaje, exista un control parcial del foco, en el tratamiento empírico de empiemas nosocomiales o en situación de riesgo de infección por microorganismos MMRR                                                                                                                                                                                                    |
| Endocarditis infecciosa (EI) e infección de dispositivos intravasculares                                                | Los pacientes con EI no complicada son candidatos a TADE, una vez alcanzada la estabilidad clínica y descartada o realizada la cirugía indicada                                                                                                                                                                                                                                                                                      |
| Enfermedad inflamatoria pélvica (EIP) y absceso tuboovárico (ATO)                                                       | Existe una escala de gravedad: estadios I, II, III y IV, que guía la indicación de ingreso hospitalario y, consecuentemente, la elección del tratamiento. Los estadios II a IV son indicación de tratamiento parenteral. De ellos, el III precisa monitorización ecográfica diaria y el IV (ATO) intervención quirúrgica de drenaje. Serían candidatas a TADE las pacientes con EPI estadio II y durante el postoperatorio de un ATO |

|                                                                                                      |                                                                                                                                                                                                                                                                                                                                                                           |
|------------------------------------------------------------------------------------------------------|---------------------------------------------------------------------------------------------------------------------------------------------------------------------------------------------------------------------------------------------------------------------------------------------------------------------------------------------------------------------------|
| Epididimitis, orquitis y prostatitis bacteriana                                                      | Es recomendable TADE en situación de fracaso previo con tratamiento oral o riesgo de MR.                                                                                                                                                                                                                                                                                  |
| Infección de un dispositivo intracerebral                                                            | Debe realizarse tratamiento iv inicial en las primeras dos semanas. Considerar los patógenos propios de la piel y la probabilidad de colonización por flora no habitual o MR.                                                                                                                                                                                             |
| Infecciones de la piel, tejido celular subcutáneo y fascia, incluyendo las úlceras del pie diabético | La indicación del tratamiento antimicrobiano parenteral y la elección del mismo vendrán condicionadas por extensión y la profundidad de la infección, las comorbilidades del paciente y los posibles mecanismos implicados: dermatopatía previa, vasculopatía periférica y/o alteraciones del retorno venoso o linfático, traumatismo accidental o quirúrgico, mordedura. |
| Infección del retroperitoneo y psoas                                                                 | Tratamiento iv inicial recomendado hasta progresión favorable inicial. El origen puede ser abdominal, vertebral (contigüidad) o metastásico. La etiología de la infección es frecuentemente polimicrobiana.                                                                                                                                                               |
| Neumonía aguda                                                                                       | Pueden completar el tratamiento empírico inicial en régimen TADE todos los pacientes con neumonías agudas con criterios de ingreso hospitalario sin fracaso respiratorio o hemodinámico. Una vez conseguida la defervescencia se recomienda completar los tratamientos con pautas “acortadas” por vía oral.                                                               |
| Neumonía necrosante y absceso de pulmón                                                              | Además de los patógenos respiratorios usuales, incluir en la etiología gramnegativos y anaerobios y no descartar etiología polimicrobiana. El TADE facilita el alta precoz desde la hospitalización convencional.                                                                                                                                                         |
| Infecciones complejas del área ORL                                                                   | Etiología polimicrobiana con la intervención de anaerobios (absceso retrofaríngeo) y la eventualidad de desarrollar complicaciones graves: Sd de Lemierre, mediastinitis, y también meningitis y absceso cerebral por contigüidad.                                                                                                                                        |
| Pielonefritis aguda                                                                                  | La indicación de TADE dependerá de los antecedentes personales, las comorbilidades, la epidemiología microbiana local y la existencia de bacteriemia u otros factores potenciales de                                                                                                                                                                                      |

|  |                                            |
|--|--------------------------------------------|
|  | gravedad (obstrucción de la vía urinaria). |
|--|--------------------------------------------|

Tabla 6a Etiología con tratamiento antibiótico oral no disponible

|              |                                                                                                                                                                                                                                                                                                                                                                                                                                             |
|--------------|---------------------------------------------------------------------------------------------------------------------------------------------------------------------------------------------------------------------------------------------------------------------------------------------------------------------------------------------------------------------------------------------------------------------------------------------|
| Situación 1. | Infecciones por patógenos primarios con resistencia adquirida u oportunistas con resistencia intrínseca en las cuales esté indicada la utilización de: piperacilina-tazobactam, aztreonam, un carbapenem, una cefalosporina de 3ª – 4ª generación, una cefalosporina de 5ª generación asociada a un inhibidor de betalactamasas, amikacina, colistina, tigeciclina, daptomicina, vacomicina o dalvabancina, en monoterapia o en combinación |
| Situación 2. | Infecciones fúngicas invasoras y fungemias en las que está indicada la utilización de anfotericina B o una equinocandina                                                                                                                                                                                                                                                                                                                    |

Tabla 6b. Etiología (o potencial etiología) donde el tratamiento antibiótico endovenoso inicial es recomendable

|                                                                                                                                                                                                                                                                                                                                                                                                                                                                                                                                                                                                                                                 |
|-------------------------------------------------------------------------------------------------------------------------------------------------------------------------------------------------------------------------------------------------------------------------------------------------------------------------------------------------------------------------------------------------------------------------------------------------------------------------------------------------------------------------------------------------------------------------------------------------------------------------------------------------|
| <ul style="list-style-type: none"> <li>➤ Bacteriemias por <i>Staphylococcus aureus</i> y <i>Candida spp.</i></li> <li>➤ Infecciones de adquisición nosocomial previo a conocimiento de resultados microbiológicos</li> <li>➤ Infecciones en pacientes con fracaso tras tratamiento antibiótico previo más de 7 días y en ausencia de resultados microbiológicos</li> <li>➤ Tratamiento inicial de infecciones por: <i>Actinomyces spp</i>, <i>Borrelia spp</i>, <i>Criptococcus neoformans</i> <i>Leishmania spp</i>, <i>Nocardia spp</i>, <i>Treponema pallidum</i>, <i>Listeria monocytogenes</i> o <i>Pneumocystis jirovecii</i>.</li> </ul> |
|-------------------------------------------------------------------------------------------------------------------------------------------------------------------------------------------------------------------------------------------------------------------------------------------------------------------------------------------------------------------------------------------------------------------------------------------------------------------------------------------------------------------------------------------------------------------------------------------------------------------------------------------------|

**Tabla 7. Duración recomendada de los principales síndromes infecciosos**

- Neumonía adquirida en la comunidad: 5 días.
- Agudización de la EPOC: 5 días.
- Neumonía asociada a ventilación mecánica: 8 días
- Infecciones de la esfera ORL: 7 días
- Infecciones cutáneas: 5-10 días.
- Infecciones intraabdominales: entre 4-7 días.
- Infecciones urinarias no complicadas: 1-3 días
- Infecciones urinarias complicadas no graves: 7 días.
- Infecciones urinarias complicadas/graves: 10-14 días.
- Meningitis aguda bacteriana:
  - Meningococo o *Haemophilus influenzae*: 7 días.
  - Neumococo: 10 días.
  - *Listeria monocytogenes*, *Streptococcus agalactiae* y bacilos gramnegativos: 3 semanas.

**Tabla 8. Principales agentes biológicos**

| Agentes biológicos                                                     | Mecanismos inmunomoduladores                                                                                                               | Uso terapéutico                                                                              |
|------------------------------------------------------------------------|--------------------------------------------------------------------------------------------------------------------------------------------|----------------------------------------------------------------------------------------------|
| Globulina antitimocítica:<br><i>ATG</i>                                | Produce destrucción de células T y disfunción de células B                                                                                 | Tratamiento del rechazo agudo, inducción en trasplantes,                                     |
| Anticuerpo monoclonal anticélulas B:<br><i>Rituximab</i>               | Interacciona con antígeno CD20 expresado en linfocitos B produciendo su lisis                                                              | Tratamiento linfomas, artritis reumatoide, esclerosis múltiple y otros procesos autoinmunes. |
| Anticuerpo monoclonal anticélulas T:<br><i>OKT3</i>                    | Unión con CD3 de linfocitos T produciendo su lisis.                                                                                        | Tratamiento rechazo agudo                                                                    |
| Anti CD 52:<br><i>Alemtuzumab</i>                                      | Unión con antígeno 52 localizado en linfocitos T, B, NK provocando su lisis, ocasionando déficit en la inmunidad celular, humoral e innata | Tratamiento de la LLC.                                                                       |
| Inhibidor de la coestimulación células T:<br><i>Abatacept</i>          | Suprime la activación de las células T                                                                                                     | Tratamiento rechazo agudo sin respuesta y Artritis reumatoide refractario a los anti-tnf     |
| Anticuerpos anticitocinas:<br><i>Tocilizumab, Anakinra</i>             | Inhibe la activación de Linfocitos T y síntesis de proteínas de fase aguda                                                                 | Tratamiento artritis reumatoide y artritis crónica juvenil                                   |
| Inhibidores migración de leucocitos:<br><i>Natalizumab, Fingolimod</i> | Impiden la migración de linfocitos al SNC y tracto digestivo                                                                               | Esclerosis múltiple y enfermedad de Crohn sin respuesta                                      |
| Anticuerpo monoclonal contra                                           | Se une al C5 e inhibe la                                                                                                                   | Tratamiento de la hemoglobinuria paroxística                                                 |

|                                                                                                                          |                                                                |                                         |
|--------------------------------------------------------------------------------------------------------------------------|----------------------------------------------------------------|-----------------------------------------|
| proteínas del complemento:<br><i>Eculizumab</i>                                                                          | activación del complemento                                     | nocturna                                |
| Inhibidores del TNF-alfa:<br><i>Infliximab,</i><br><i>Adalimumab,</i><br><i>Certolizumab pegol,</i><br><i>Etanercept</i> | Inhiben los macrófagos, impidiendo la formación de granulomas. | Tratamiento de enfermedades autoinmunes |

(Adaptado de Furst D, *et al. Ann Rheum Dis* 2007; 66 Suppl 3:2-22)

**Tabla 9. Principales enfermedades infecciosas asociadas a cada inmunosupresor**

| Agente Biológico | Principales infecciones asociadas                                                                                                                                |
|------------------|------------------------------------------------------------------------------------------------------------------------------------------------------------------|
| ATG              | Reactivación virus herpes y CMV                                                                                                                                  |
| Rituximab        | Reactivación VHB, LMP,                                                                                                                                           |
| OKT3             | CMV, síndrome linfoproliferativo asociado a VEB, <i>Pneumocystis</i>                                                                                             |
| Alemtuzumab      | Reactivación VVZ, CMV, <i>Pneumocystis</i> , infecciones fúngicas invasivas                                                                                      |
| Abatacept,       | CMV, <i>Pneumocystis</i> , LMP, reactivación tuberculosis                                                                                                        |
| Tocilizumab      | VHZ, diverticulitis perforada, infecciones bacterianas                                                                                                           |
| Anakinra         | Infecciones bacterianas agudas                                                                                                                                   |
| Natalizumab      | LMP                                                                                                                                                              |
| Fingolimod       | Encefalitis VHS, primoinfección grave HVZ                                                                                                                        |
| Eculizumab       | Infecciones por <i>Neisseria</i>                                                                                                                                 |
| Anti TNF         | Reactivación de tuberculosis, micobacterias atípicas, criptococosis, <i>Listeria</i> , <i>Legionella</i> , Leishmaniasis, Nocardiasis, Aspergilosis, Candidiasis |

Adaptado de Koo S, et al. *Infect Dis Clin North Am* 2010; 24(2):285-306)



**Figura 1. Material informativo para paciente/cuidador en la autoadministración**

**ADMINISTRACIÓN ANTIBIÓTICO BOMBA ELASTOMÉRICA**

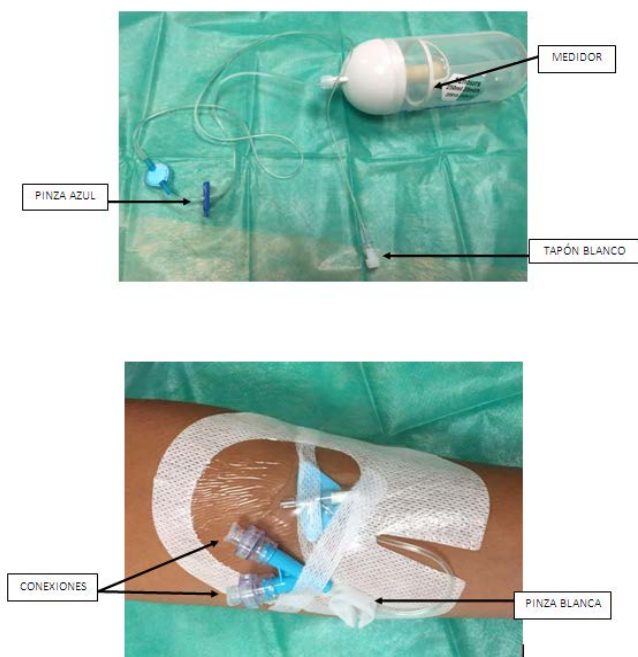

**Material necesario:**

- Bomba elastomérica
- Jeringa precargada con suero fisiológico
- Guantes estériles
- Gasas
- Alcohol
- Gel alcohólico
- Talla

**Modo de empleo:**

1. Sacar la bomba elastomérica 1h antes de su administración.
2. Lavarse las manos con agua y jabón.
3. Aplicarse gel alcohólico.
4. Colocar la talla encima de la mesa.
5. Preparar el material.
6. Quitar el aire a la jeringa precargada.
7. Limpiar una conexión del catéter con alcohol.
8. Despinzar pinza blanca del catéter.
9. Conectar jeringa precargada e introducir 5ml de suero.
10. Desenroscar tapón blanco bomba elastomérica i conectar al catéter.
11. Despinzar pinza azul bomba elastomérica
12. Esperar hasta que el antibiótico acabe de pasar, esto es cuando el medidor está en el 0.
13. Desconectar bomba elastomérica.
14. Conectar jeringa precargada e introducir el resto de suero.
15. Pinzar pinza blanca catéter.

**Figura 2: Manejo de NAC en régimen de Hospitalización a Domicilio**

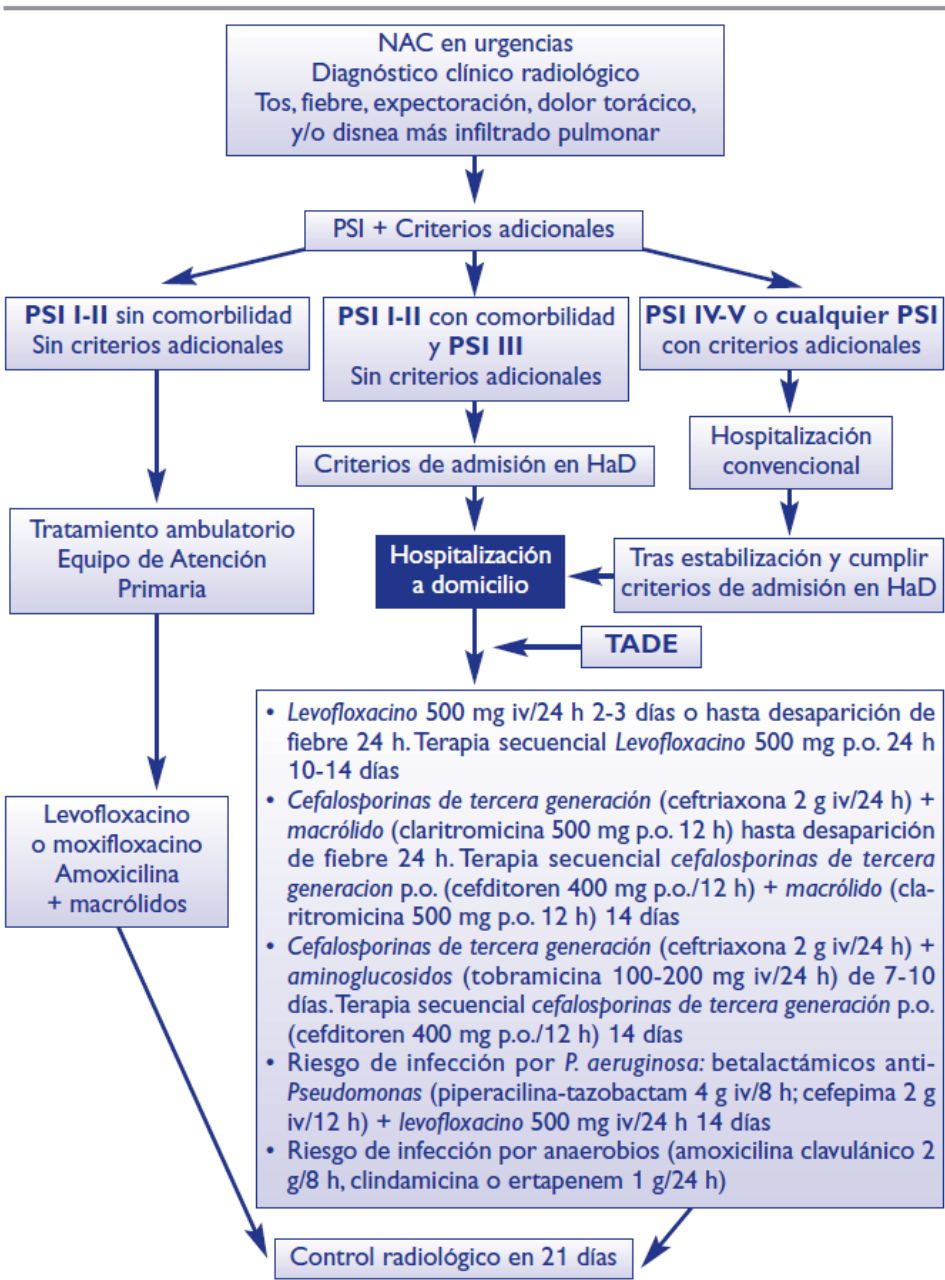

NAC: neumonía adquirida en la comunidad; HaD: hospitalización a domicilio; PSI: pneumonia severity index; TADE: tratamiento antimicrobiano domiciliario endovenoso.

**Figura 3: Manejo de neumonía nosocomial en régimen de Hospitalización a Domicilio**

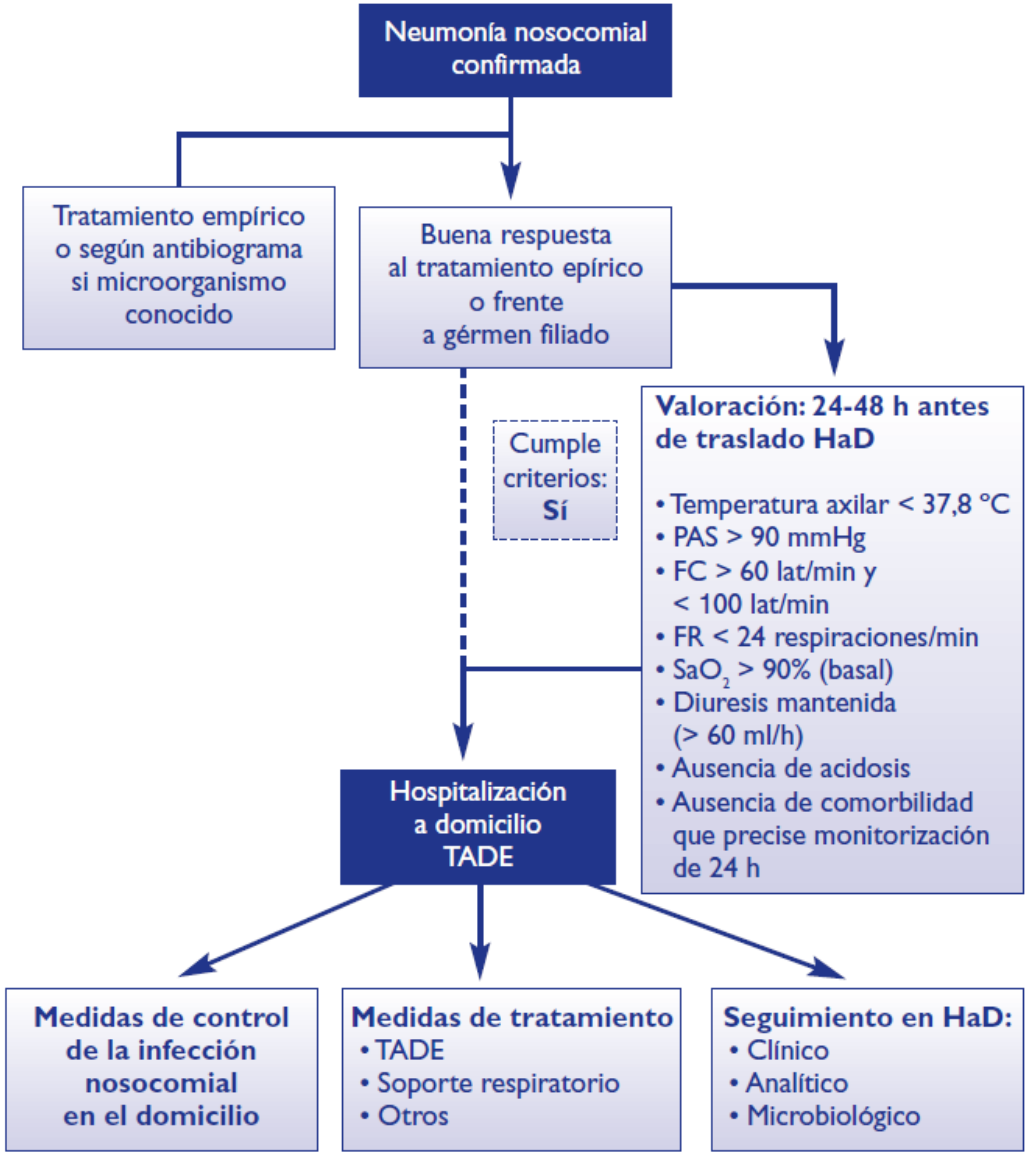

## Anexo 1

- Factores de riesgo de mala evolución: inadecuación del tratamiento antibiótico, shock séptico, inmunodepresión, malnutrición, diabetes, insuficiencia renal crónica, EPOC, cirrosis hepática, > 65 años, peritonitis fecaloidea o con control de foco difícil.
- Clasificación de la gravedad:
  - Infección intraabdominal leve-moderada: SIRS con lactato venoso  $\leq 2$  mmol/l<sup>1</sup>
  - Infección intraabdominal grave:
    - Presencia de cuatro criterios de SIRS o
    - SIRS con fallo de un órgano (sepsis grave), hipotensión que requiere el uso de fármacos vasoactivos (shock séptico) o lactato venoso > de 2 mmol/l

SIRS: Síndrome de respuesta inflamatoria sistémica, caracterizado por la presencia de 2 o más de los siguientes criterios: fiebre  $>38$  °C o  $<36$  °C, frecuencia cardíaca  $>90$  ppm, frecuencia respiratoria  $>20$  rpp, recuento leucocitario  $>12.000$  l/mm<sup>3</sup> o  $<4.000$  l/mm<sup>3</sup> o  $>10\%$  de cayados.

<sup>1</sup>No es imprescindible la determinación del lactato si no hay otros criterios de gravedad.
